# Supplementary material for: Genetically identification of endometriosis and cancers risk in women through a two-sample Mendelian randomization study
Source: PubMed Central journal article supplement (PMC11006903; doi:10.1038/s41598-024-58950-7), 2024-04-10
Supplement: 41598_2024_58950_MOESM5_ESM.pdf [file 41598_2024_58950_MOESM5_ESM.pdf]

**A**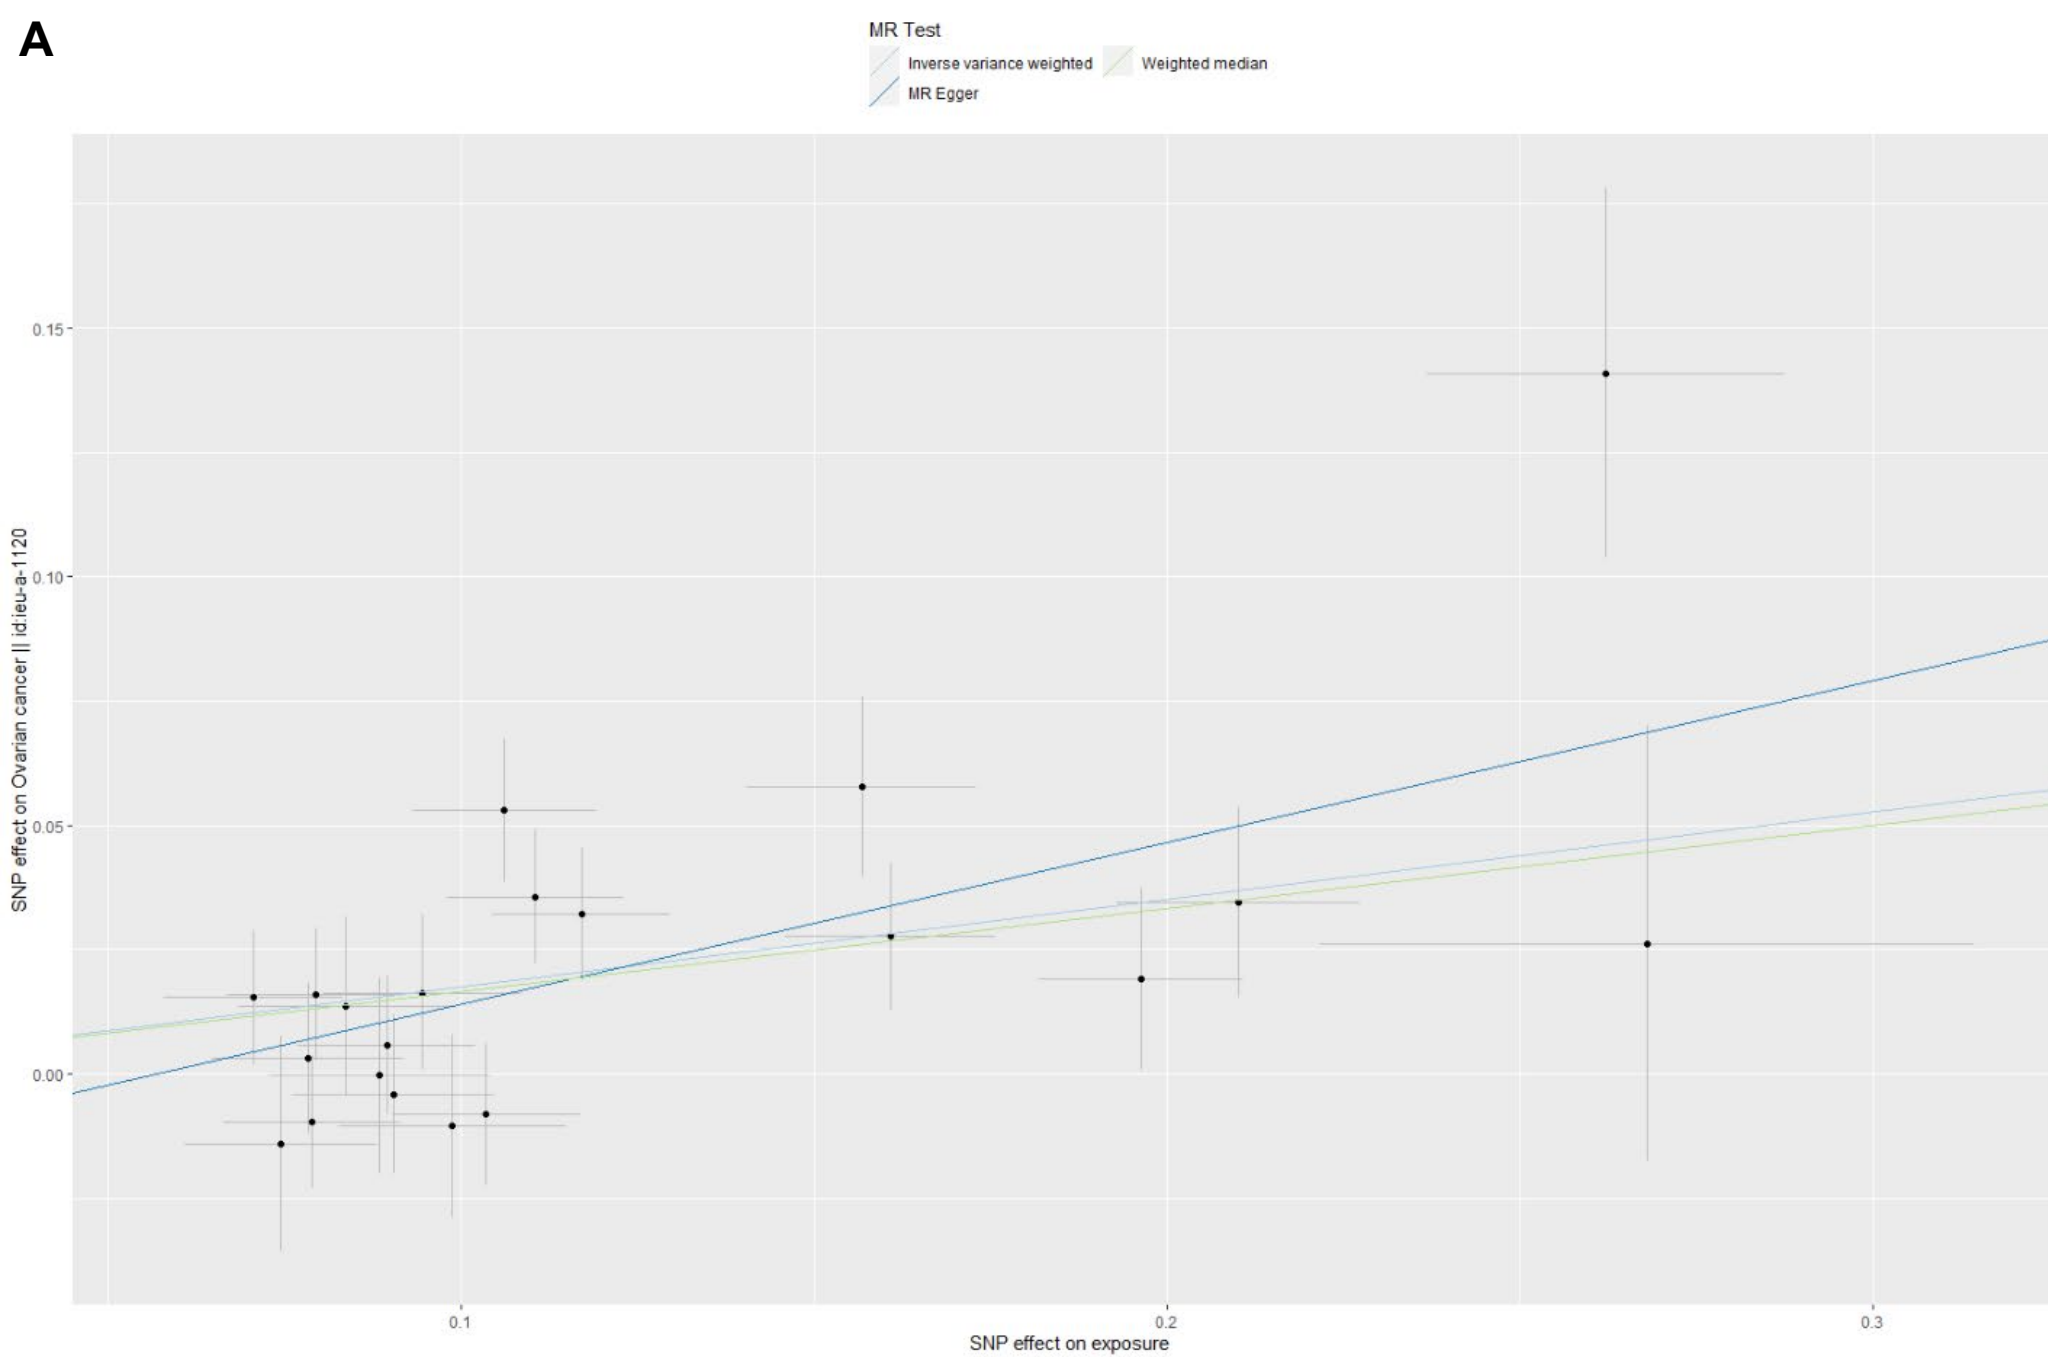

Supplementary Figure 1. Scatter plot (A) and funnel plot (B) of the causal effect of endometriosis on ovarian cancer.

**B**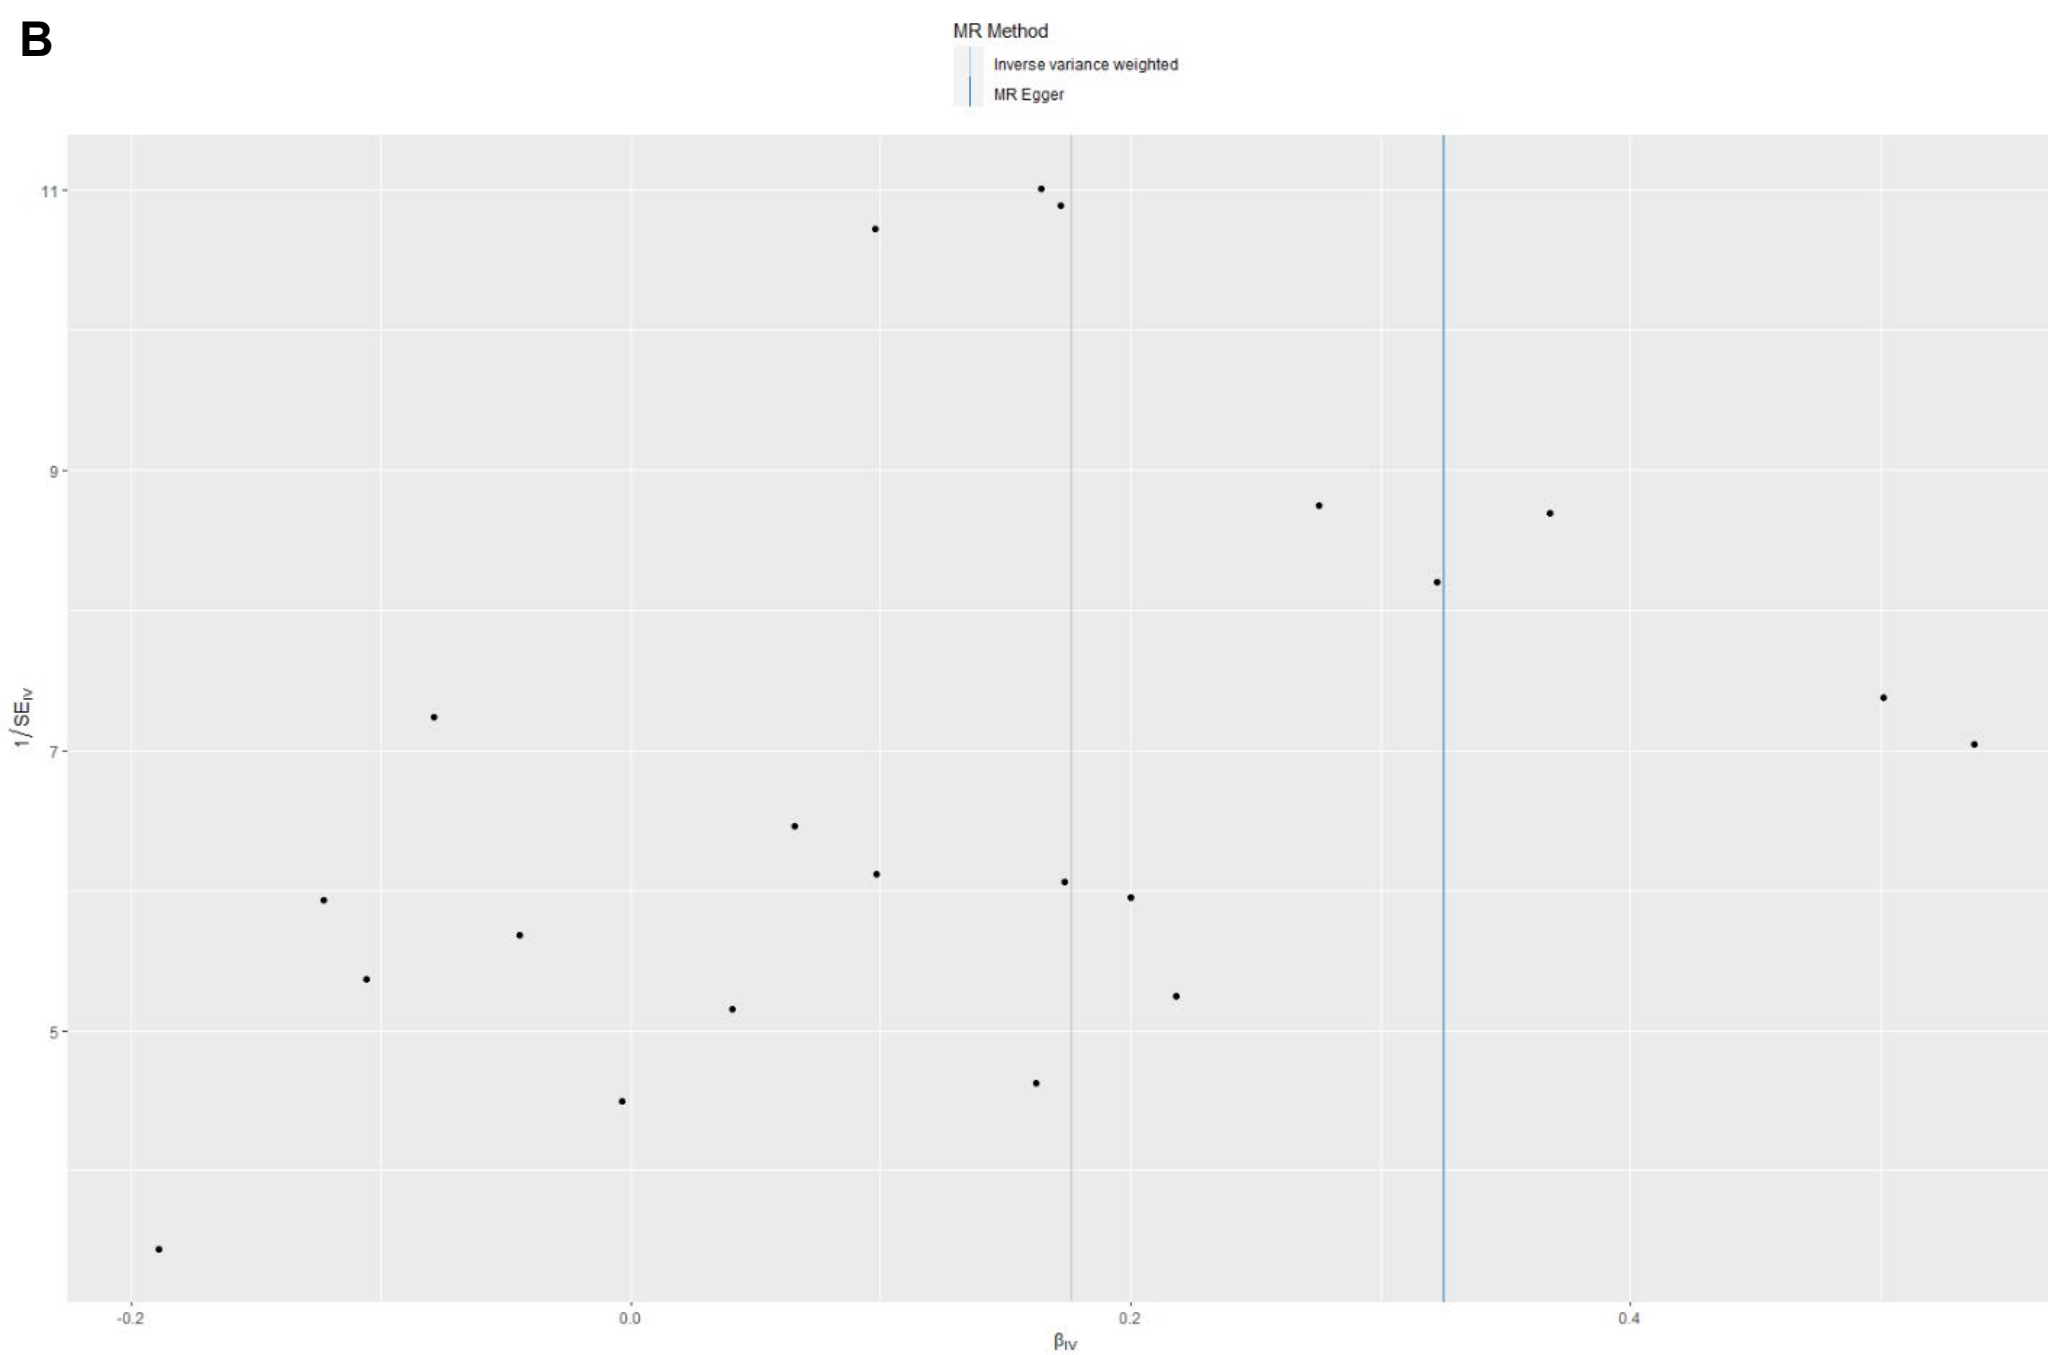

Supplementary Figure 1. Scatter plot (A) and funnel plot (B) of the causal effect of endometriosis on ovarian cancer.

**A**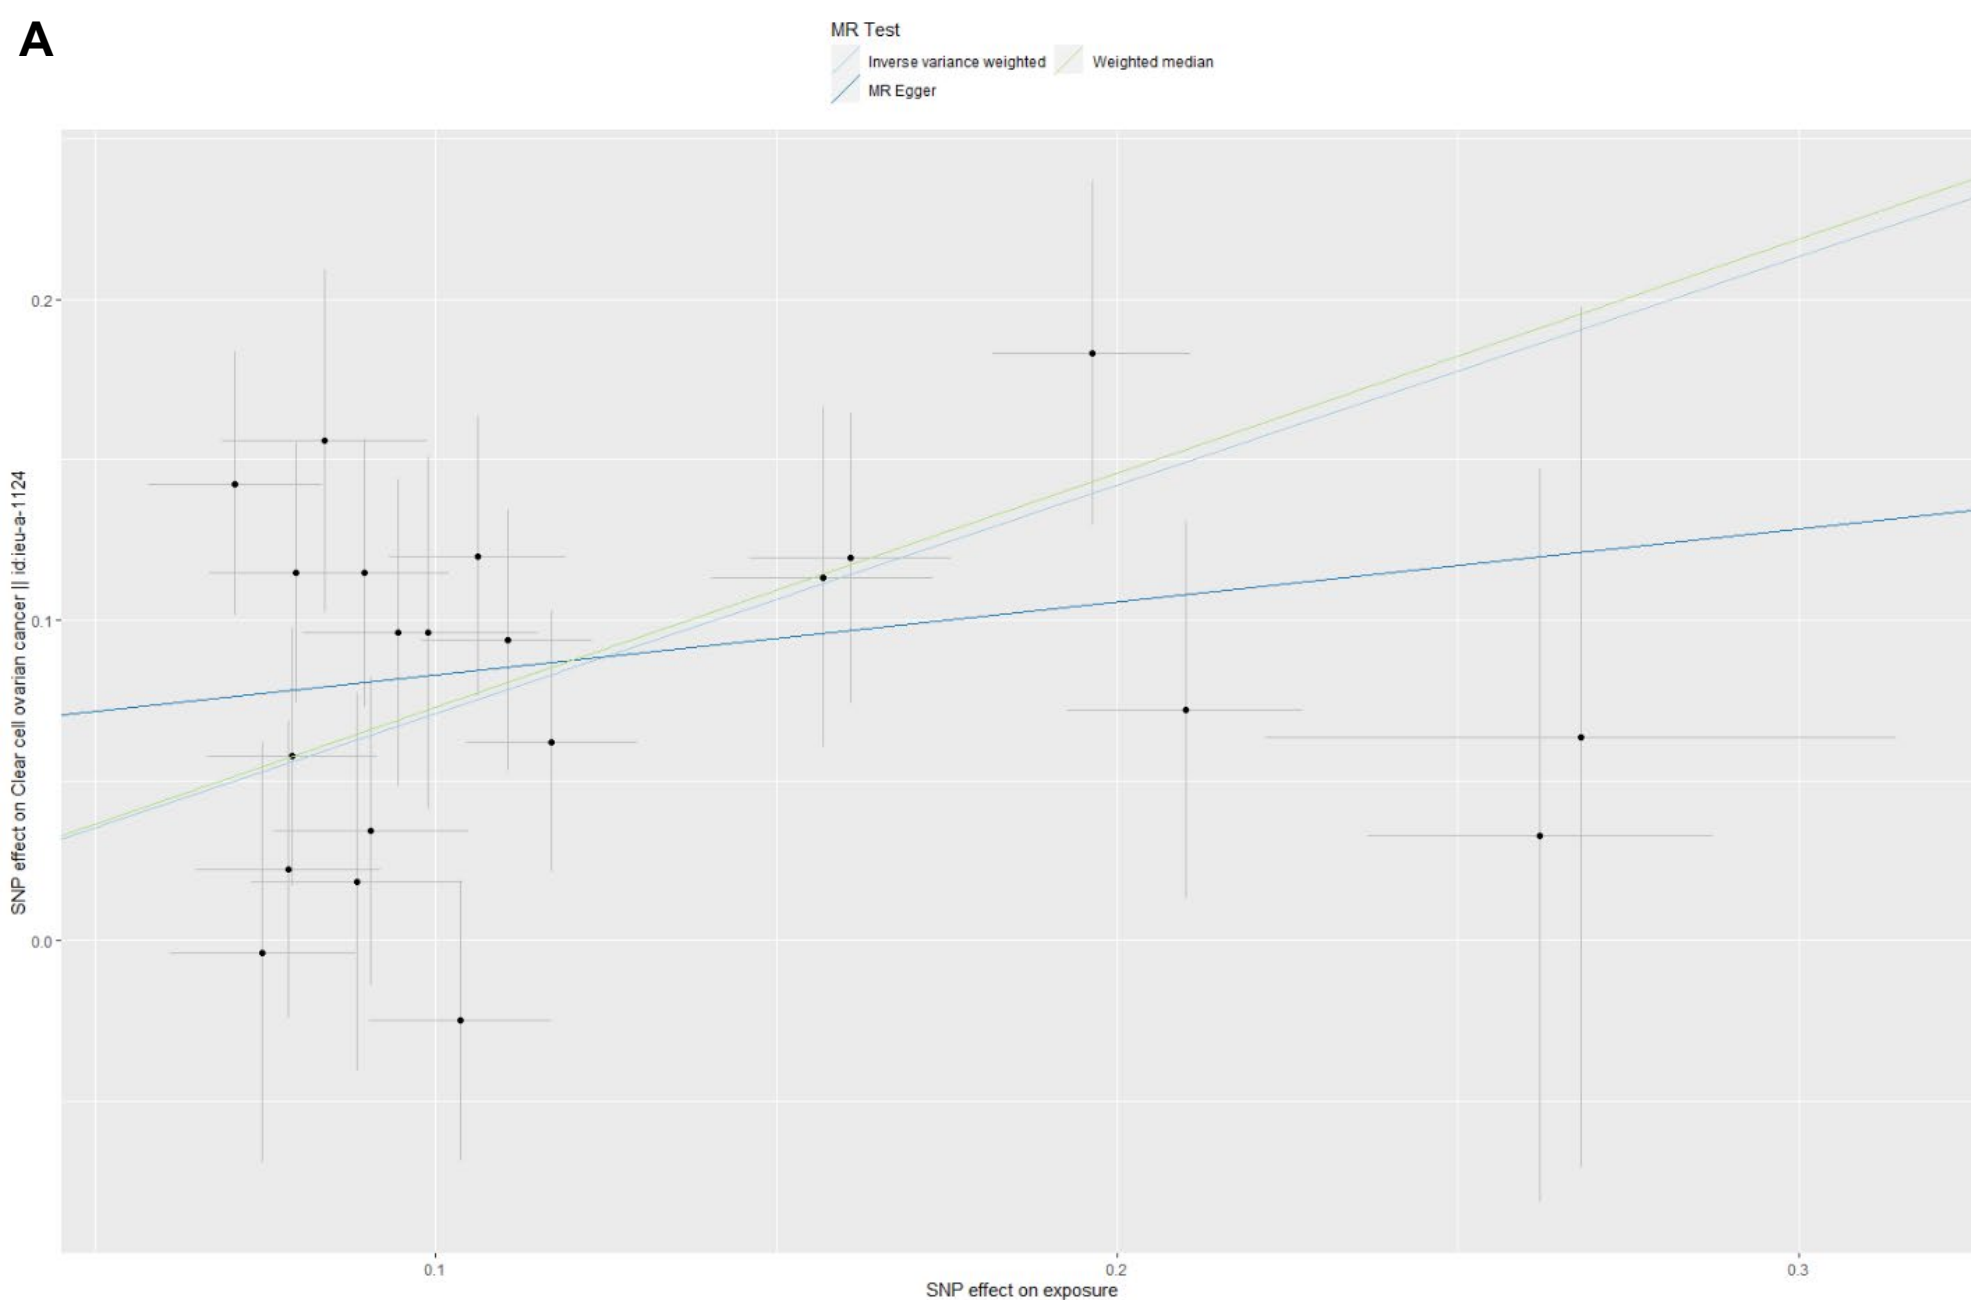

Supplementary Figure 2. Scatter plot (A) and funnel plot (B) of the causal effect of endometriosis on clear cell ovarian cancer.

**B**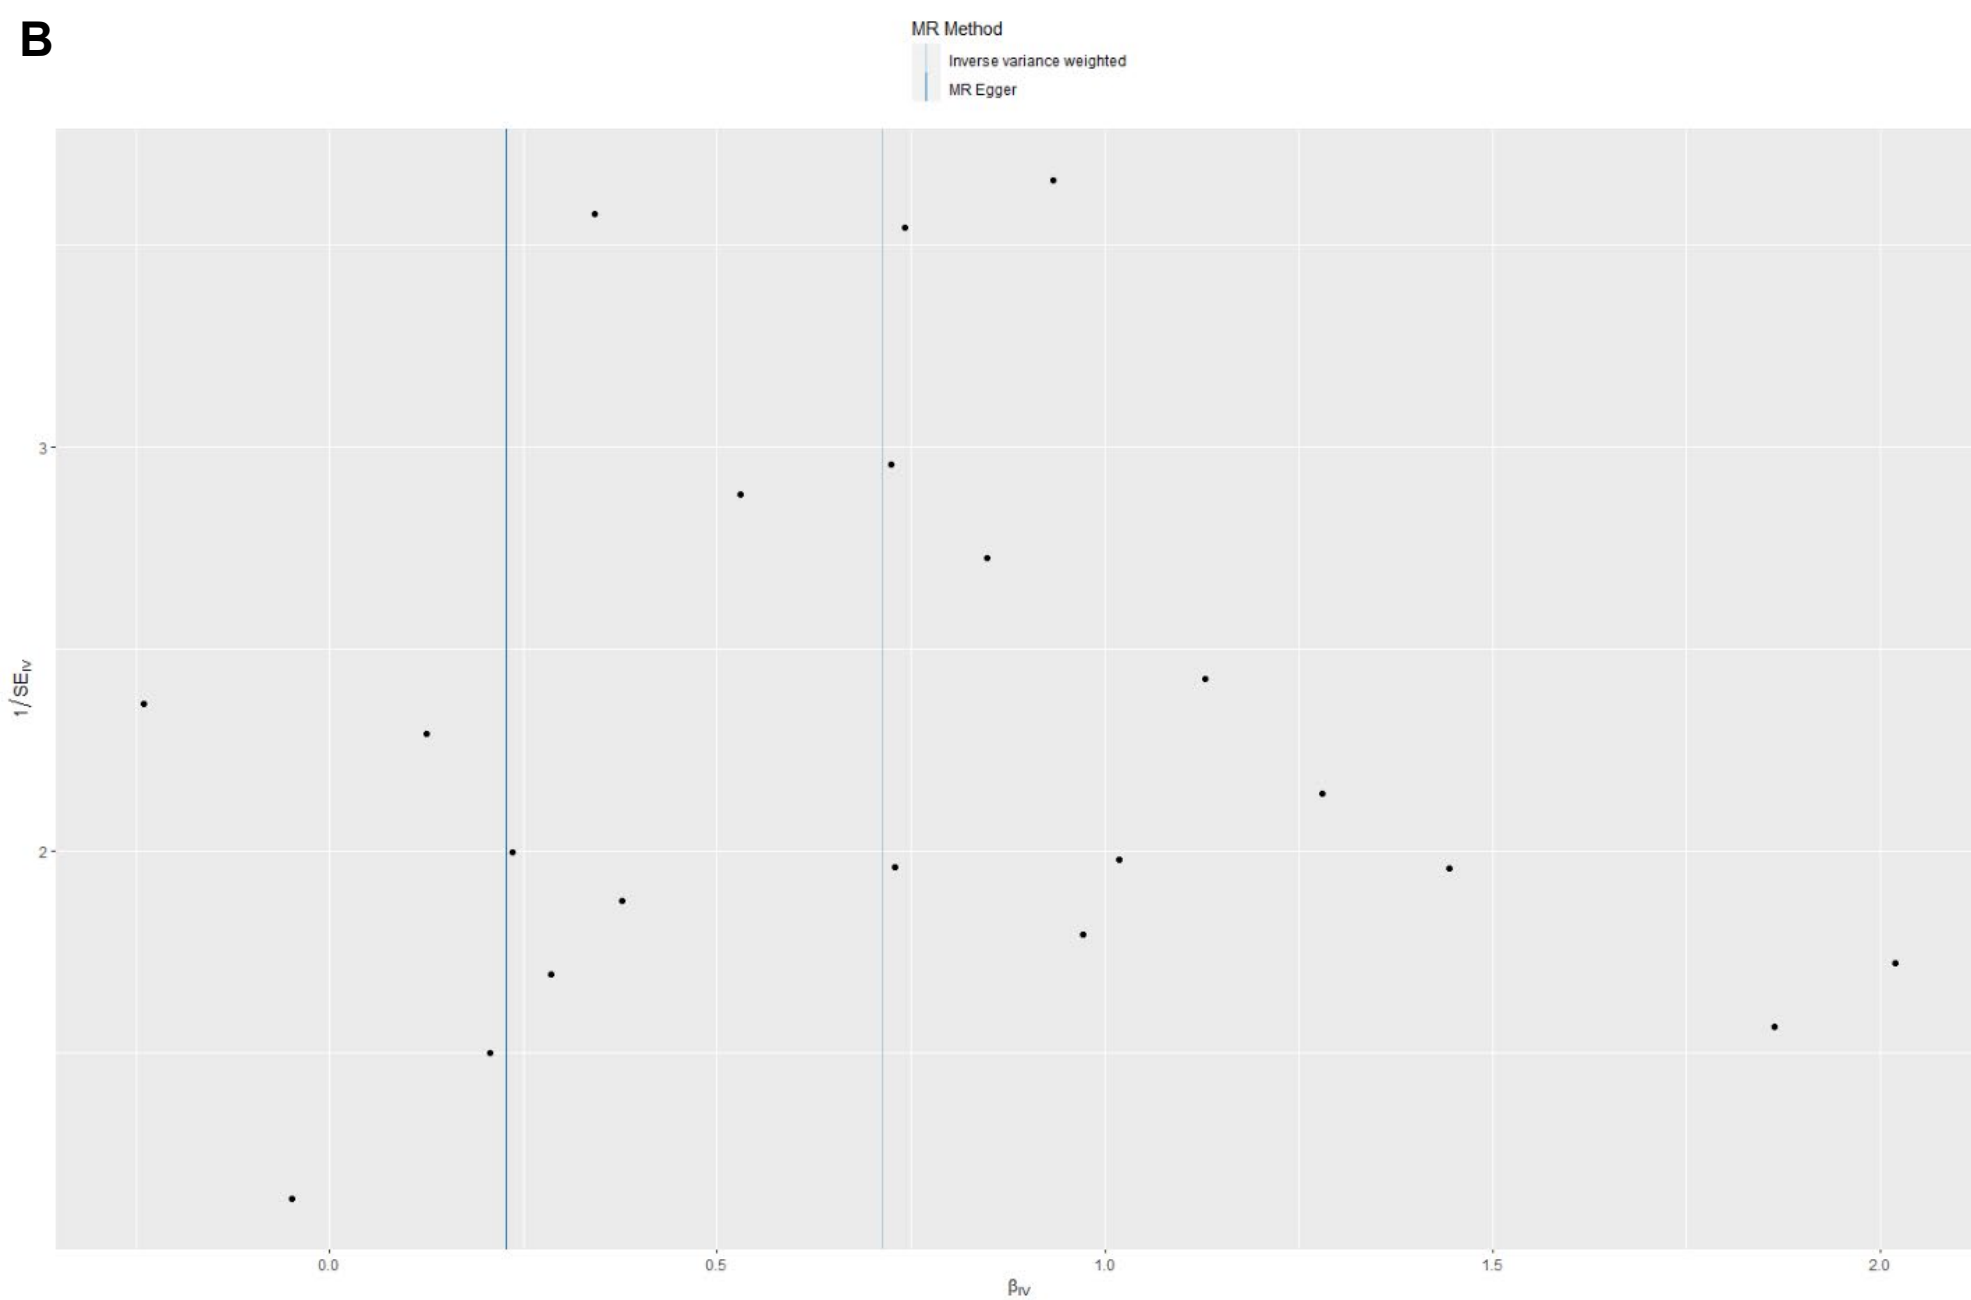

Supplementary Figure 2. Scatter plot (A) and funnel plot (B) of the causal effect of endometriosis on clear cell ovarian cancer.

**A**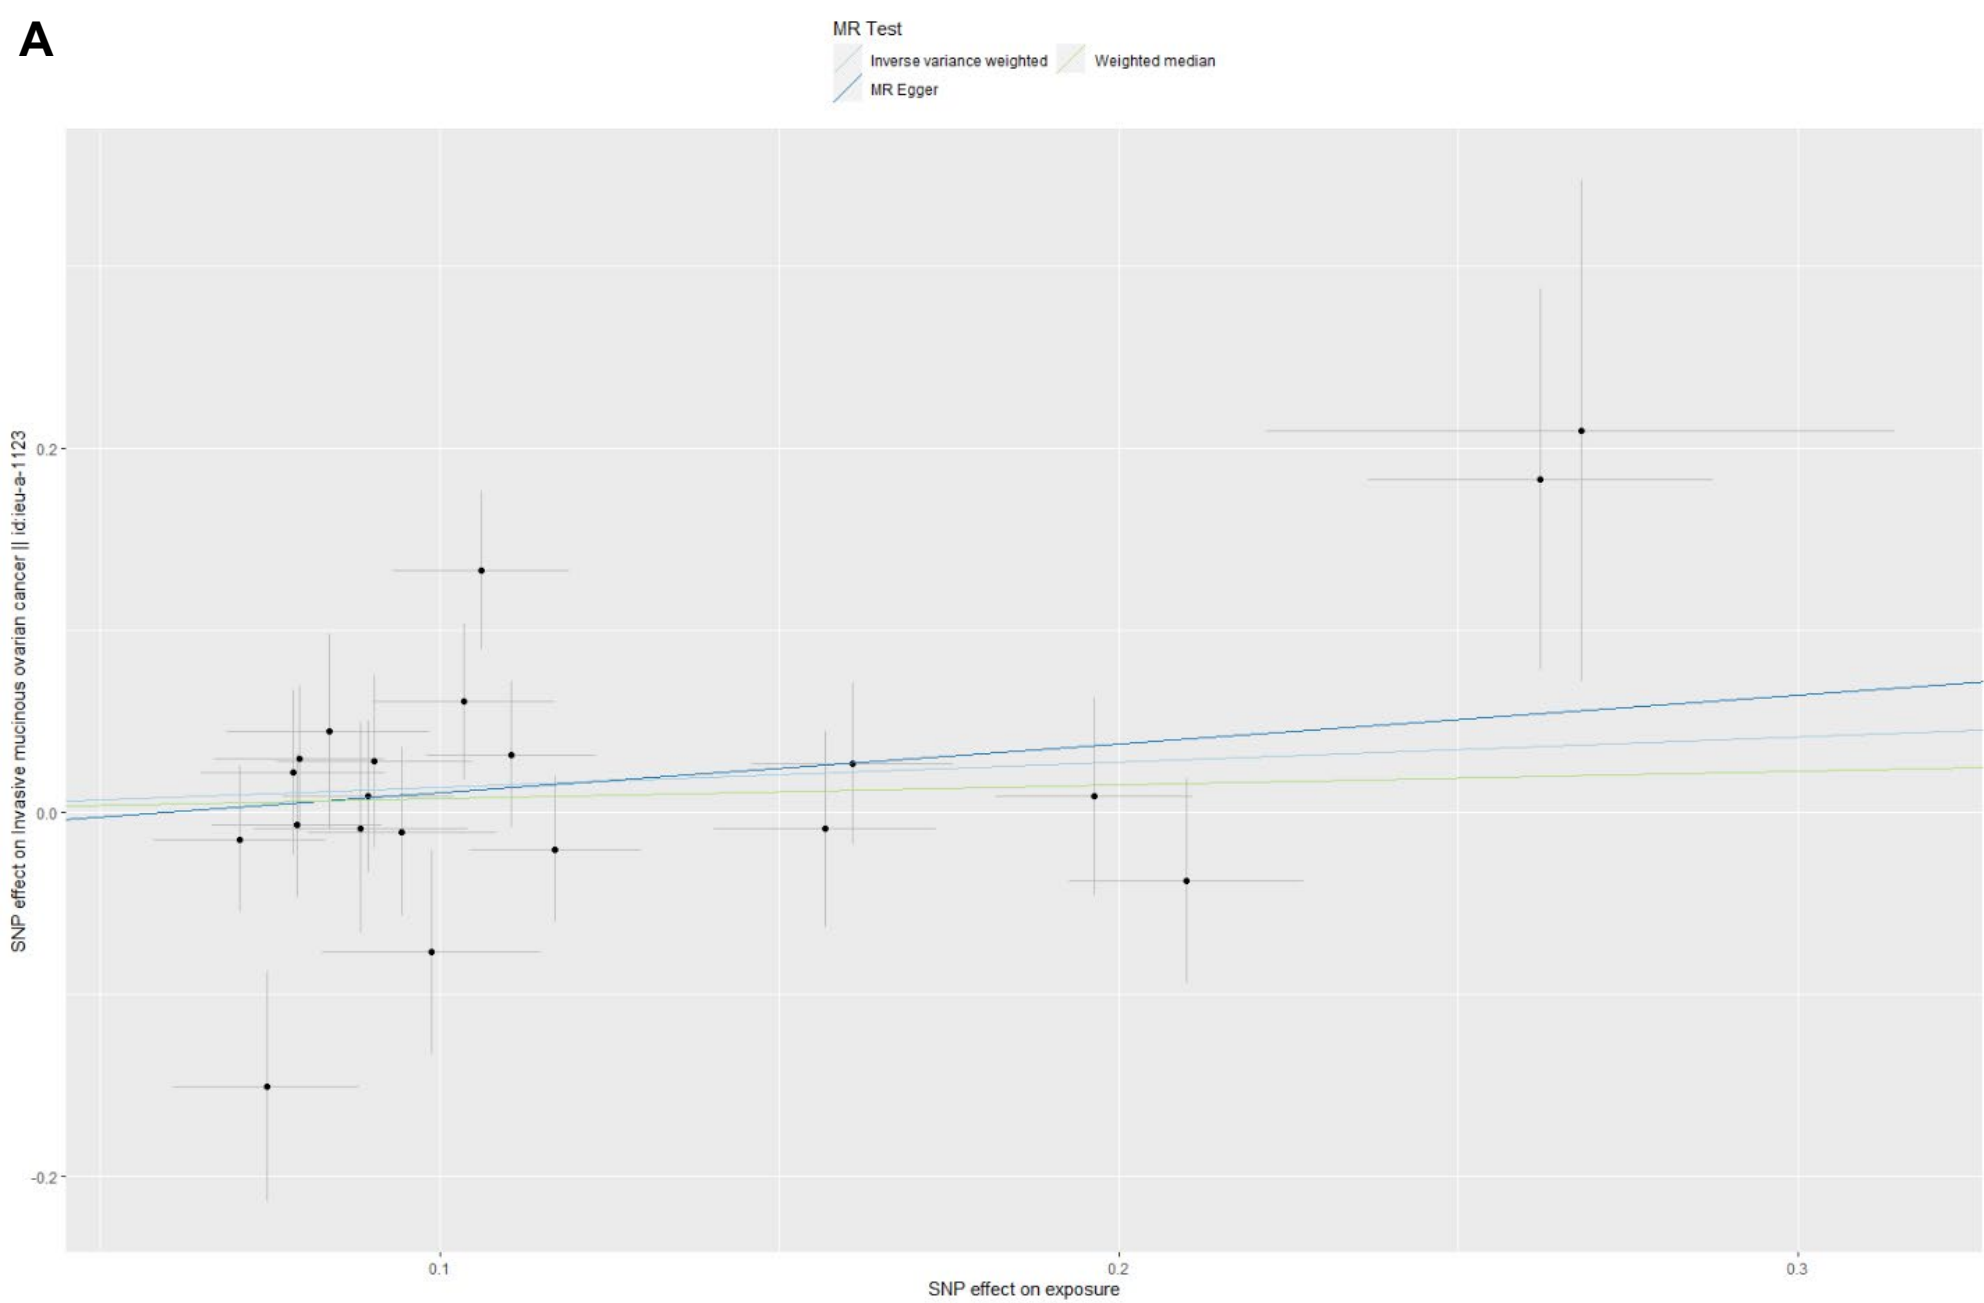

Supplementary Figure 3. Scatter plot (A) and funnel plot (B) of the causal effect of endometriosis on invasive mucinous ovarian cancer.

**B**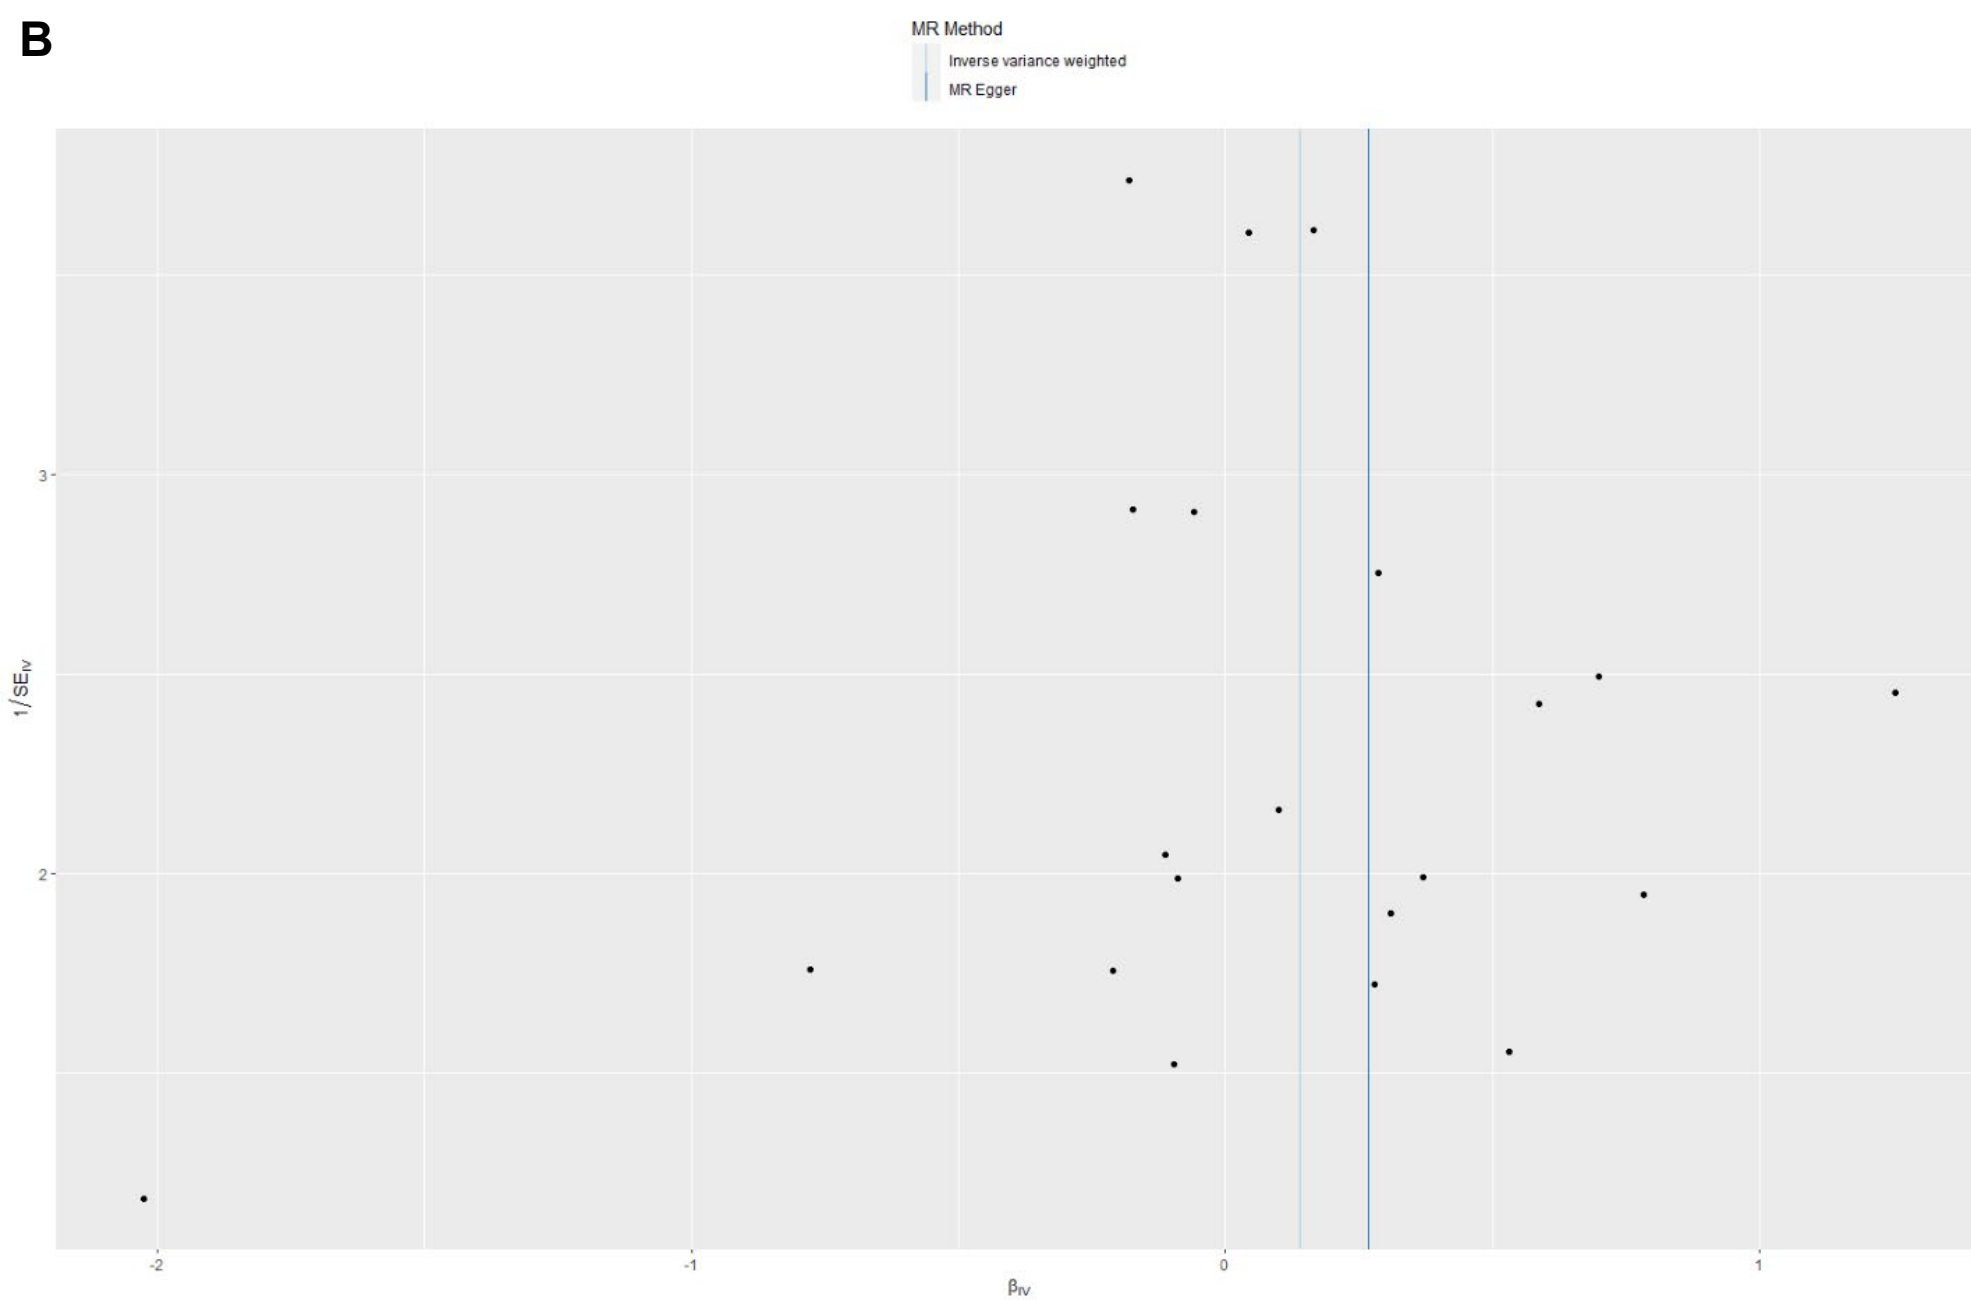

Supplementary Figure 3. Scatter plot (A) and funnel plot (B) of the causal effect of endometriosis on invasive mucinous ovarian cancer.

**A**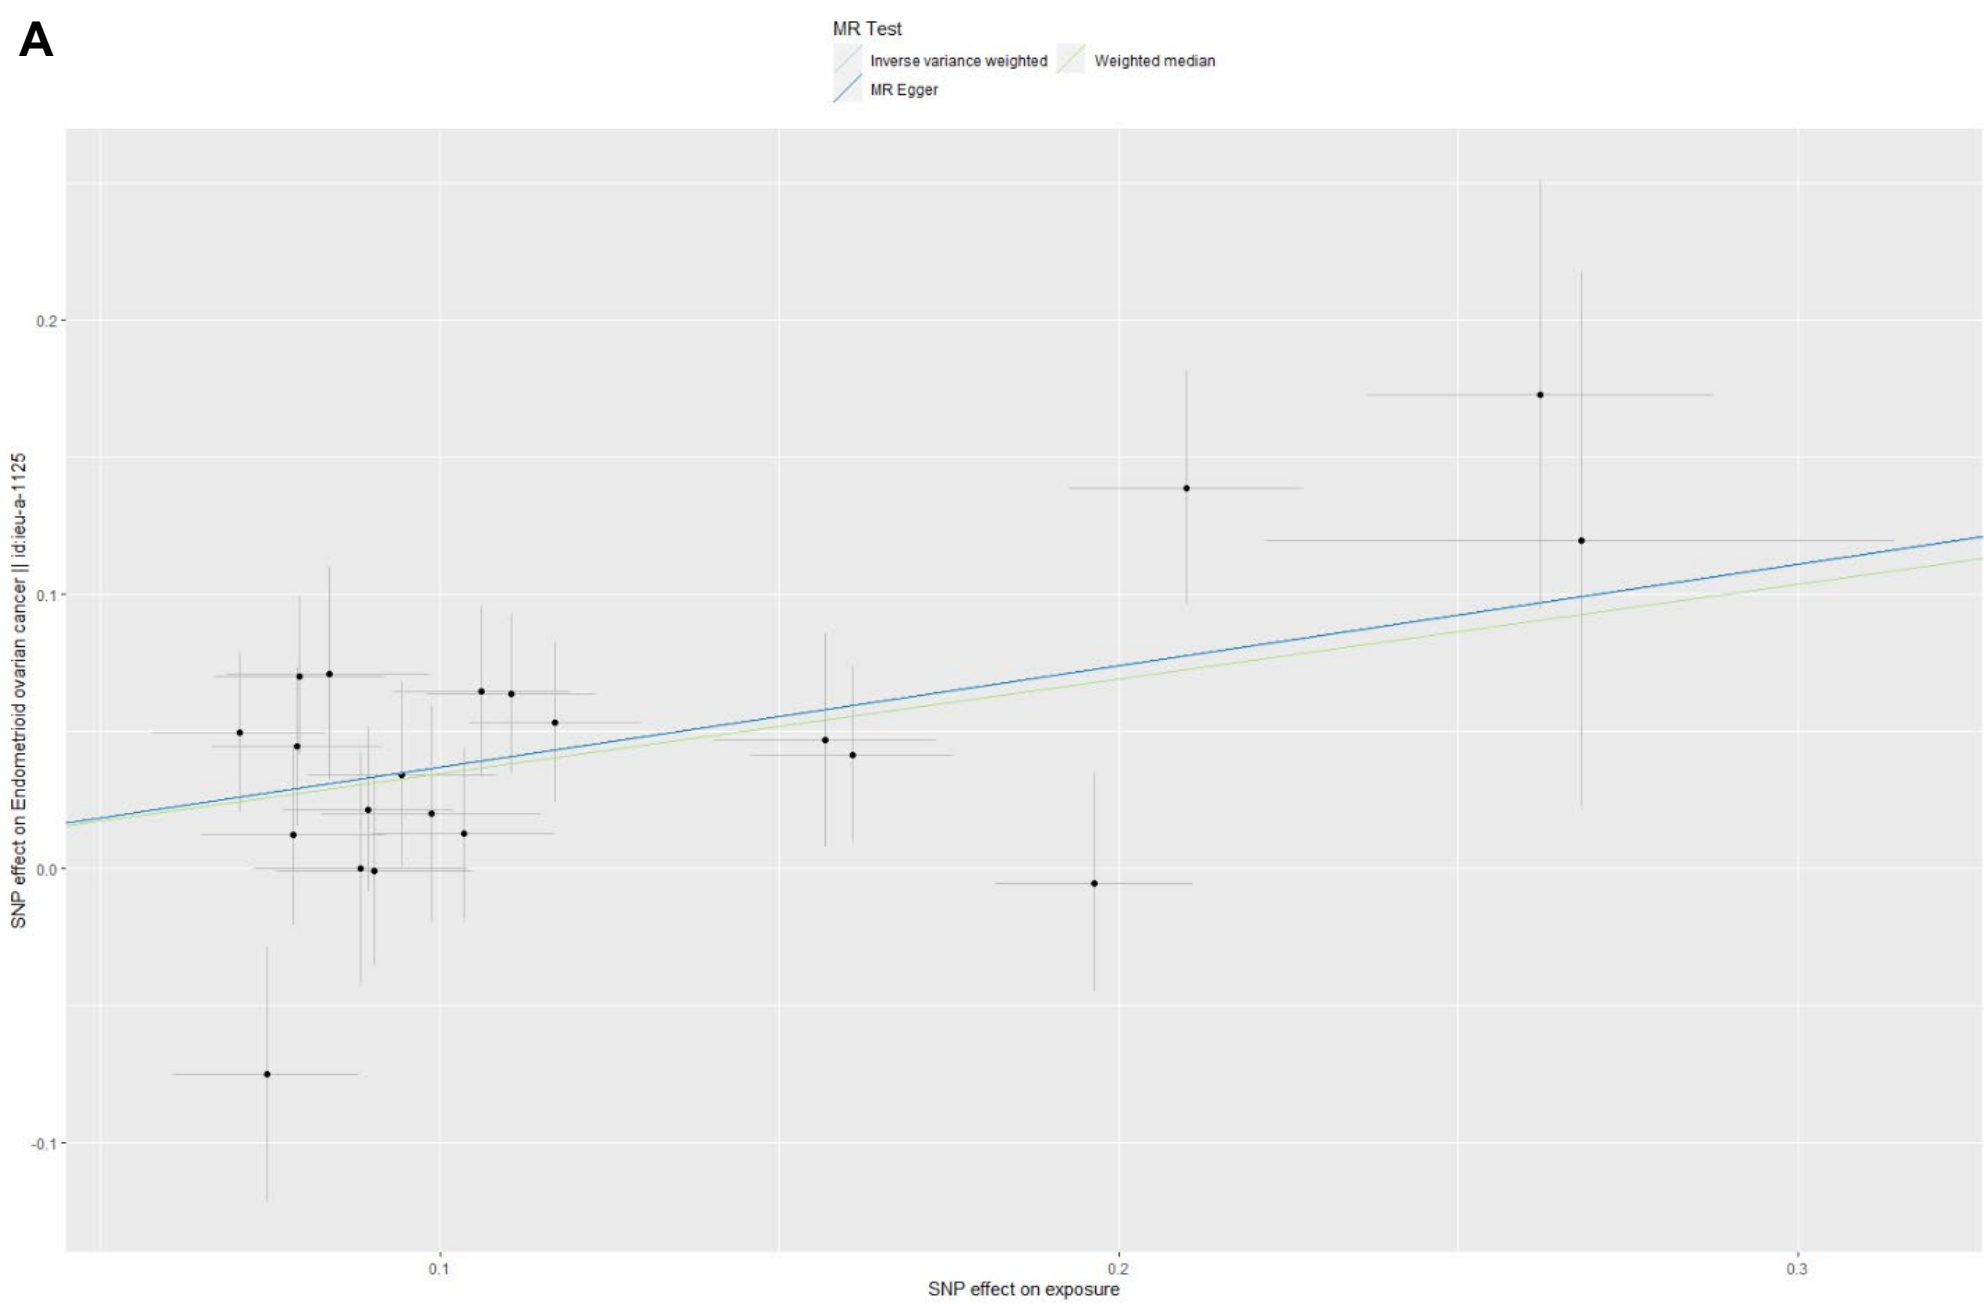

Supplementary Figure 4. Scatter plot (A) and funnel plot (B) of the causal effect of endometriosis on endometrioid ovarian cancer.

**B**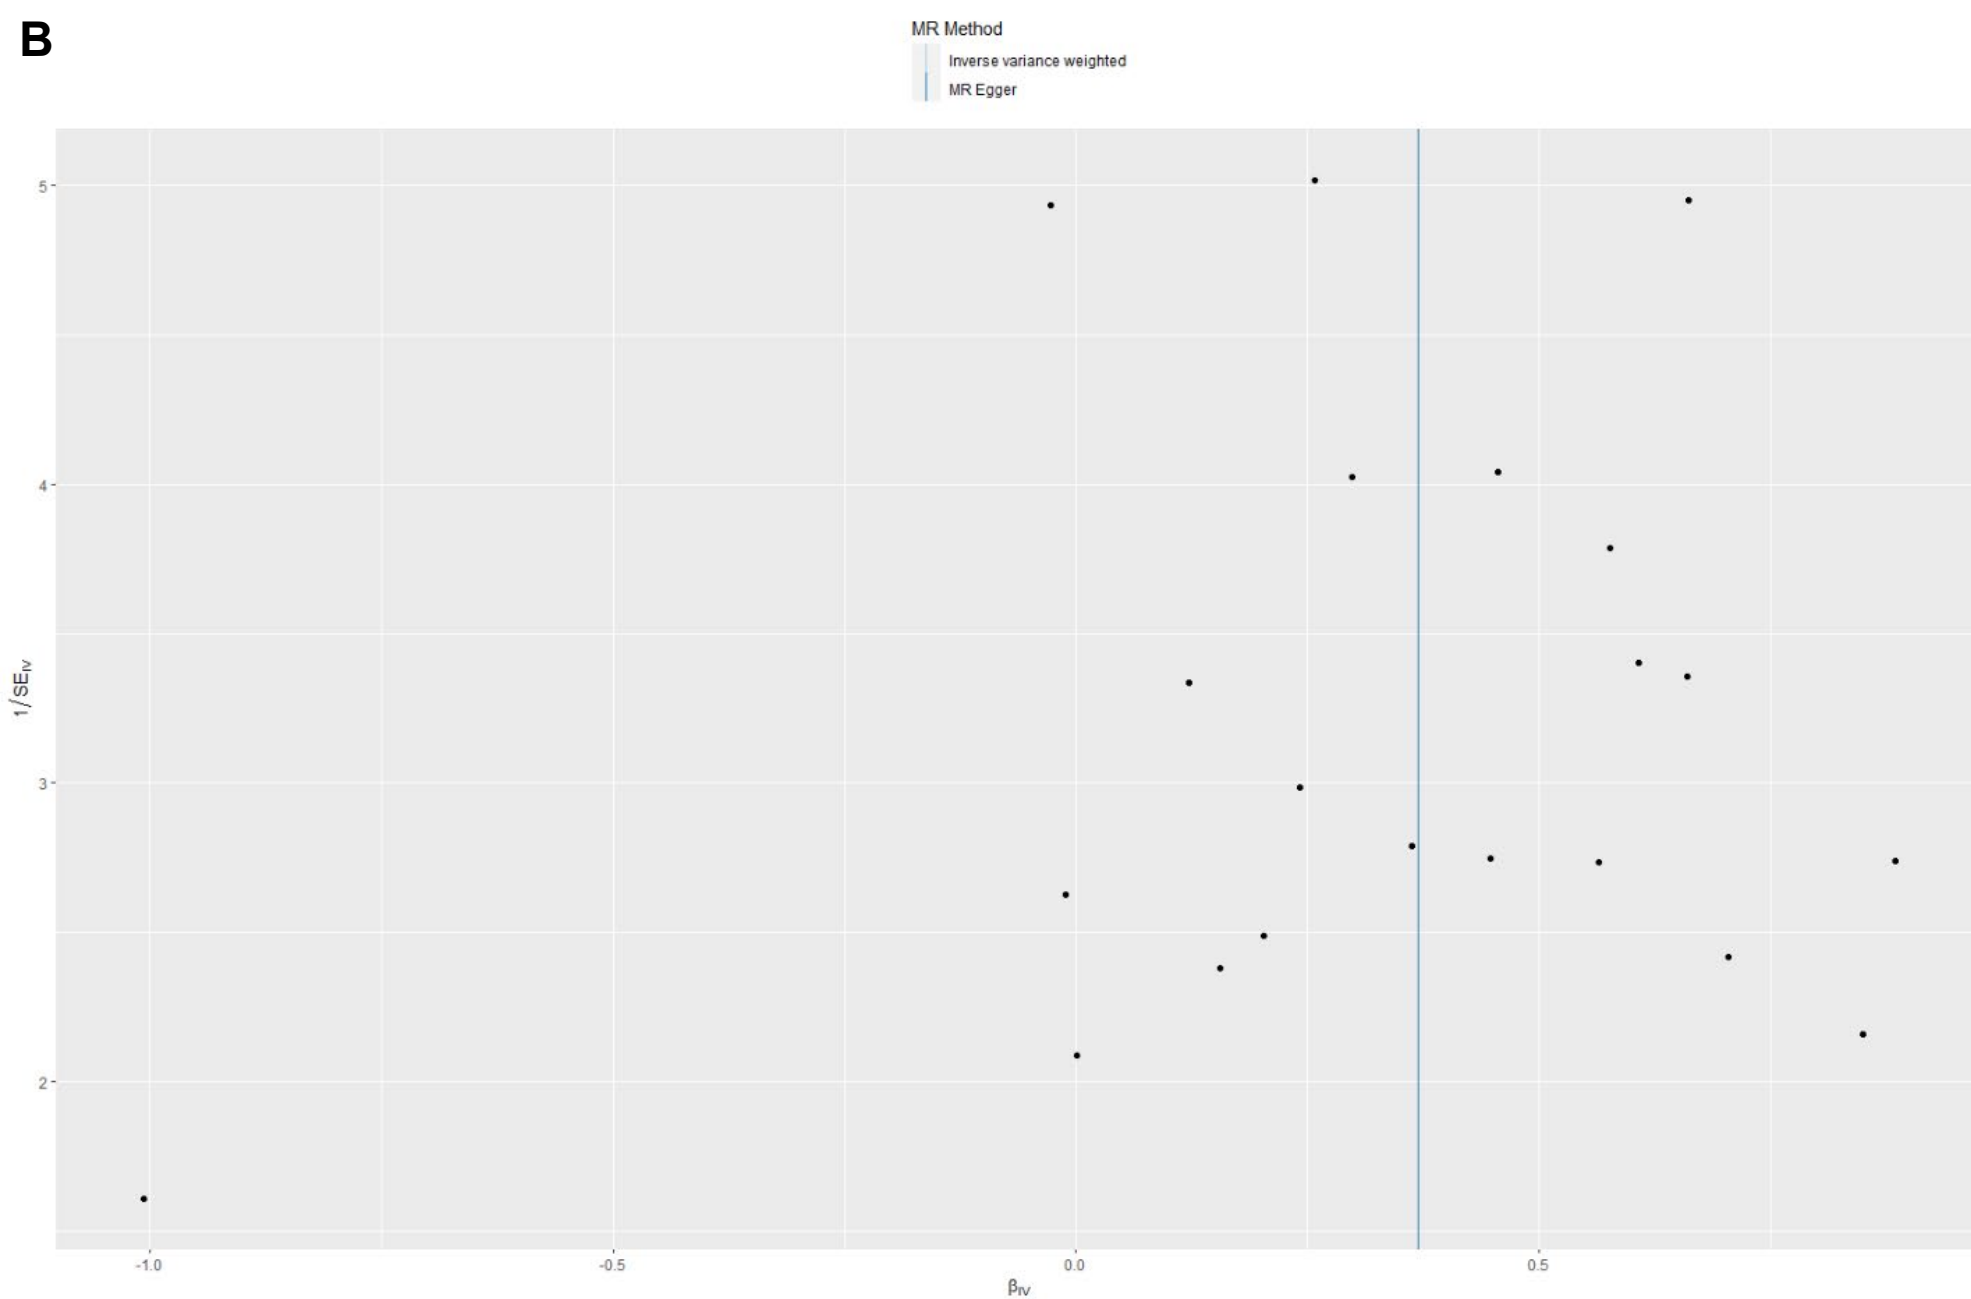

Supplementary Figure 4. Scatter plot (A) and funnel plot (B) of the causal effect of endometriosis on endometrioid ovarian cancer.



**A**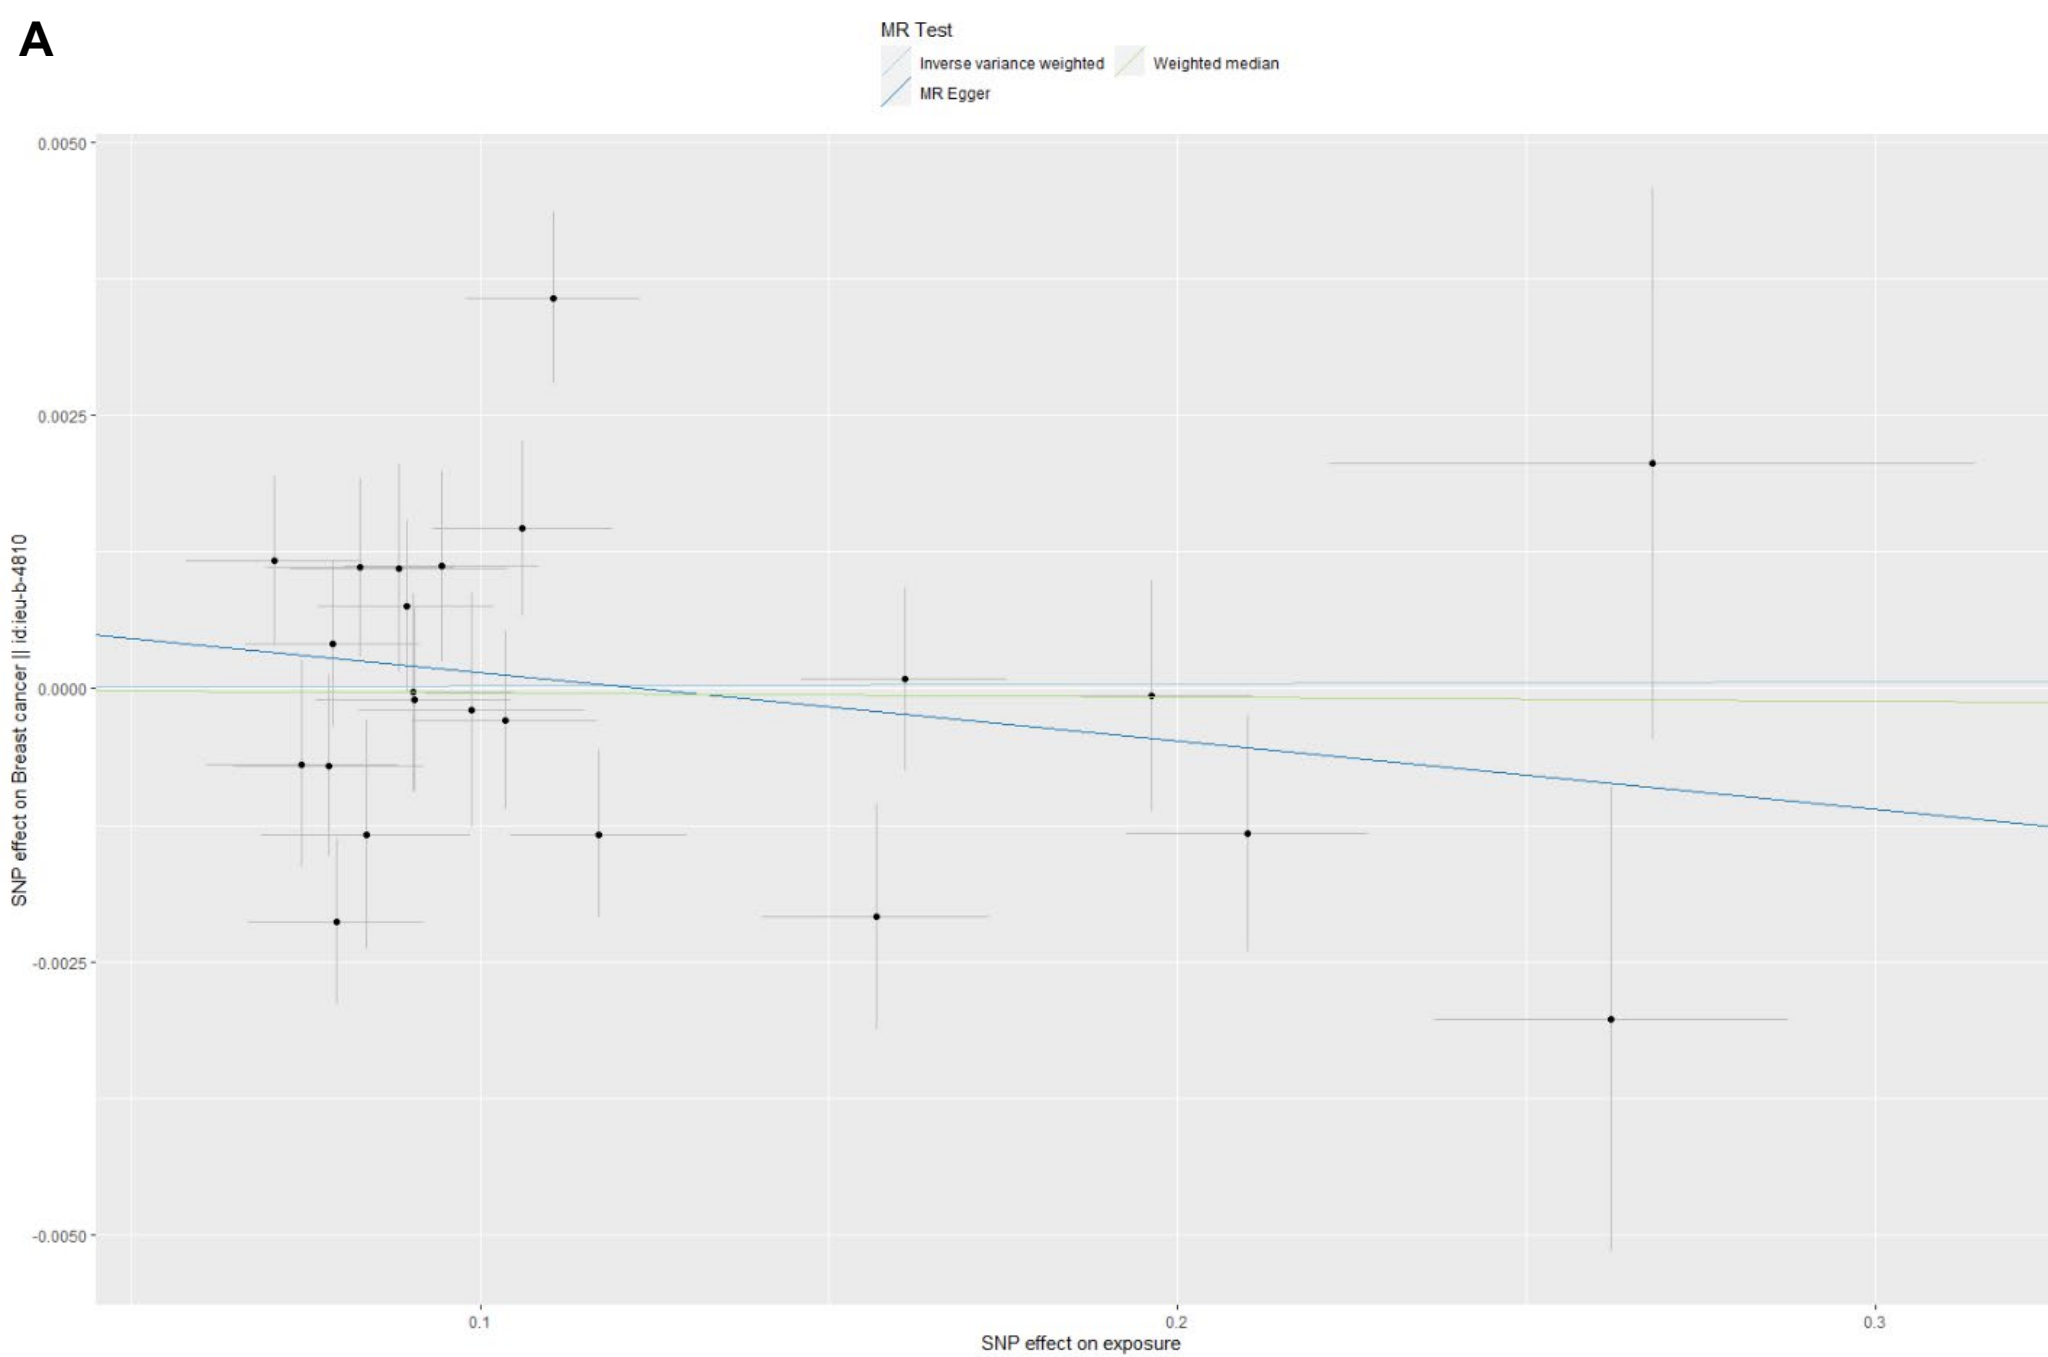

Supplementary Figure 5. Scatter plot (A) and funnel plot (B) of the causal effect of endometriosis on breast cancer.

**B**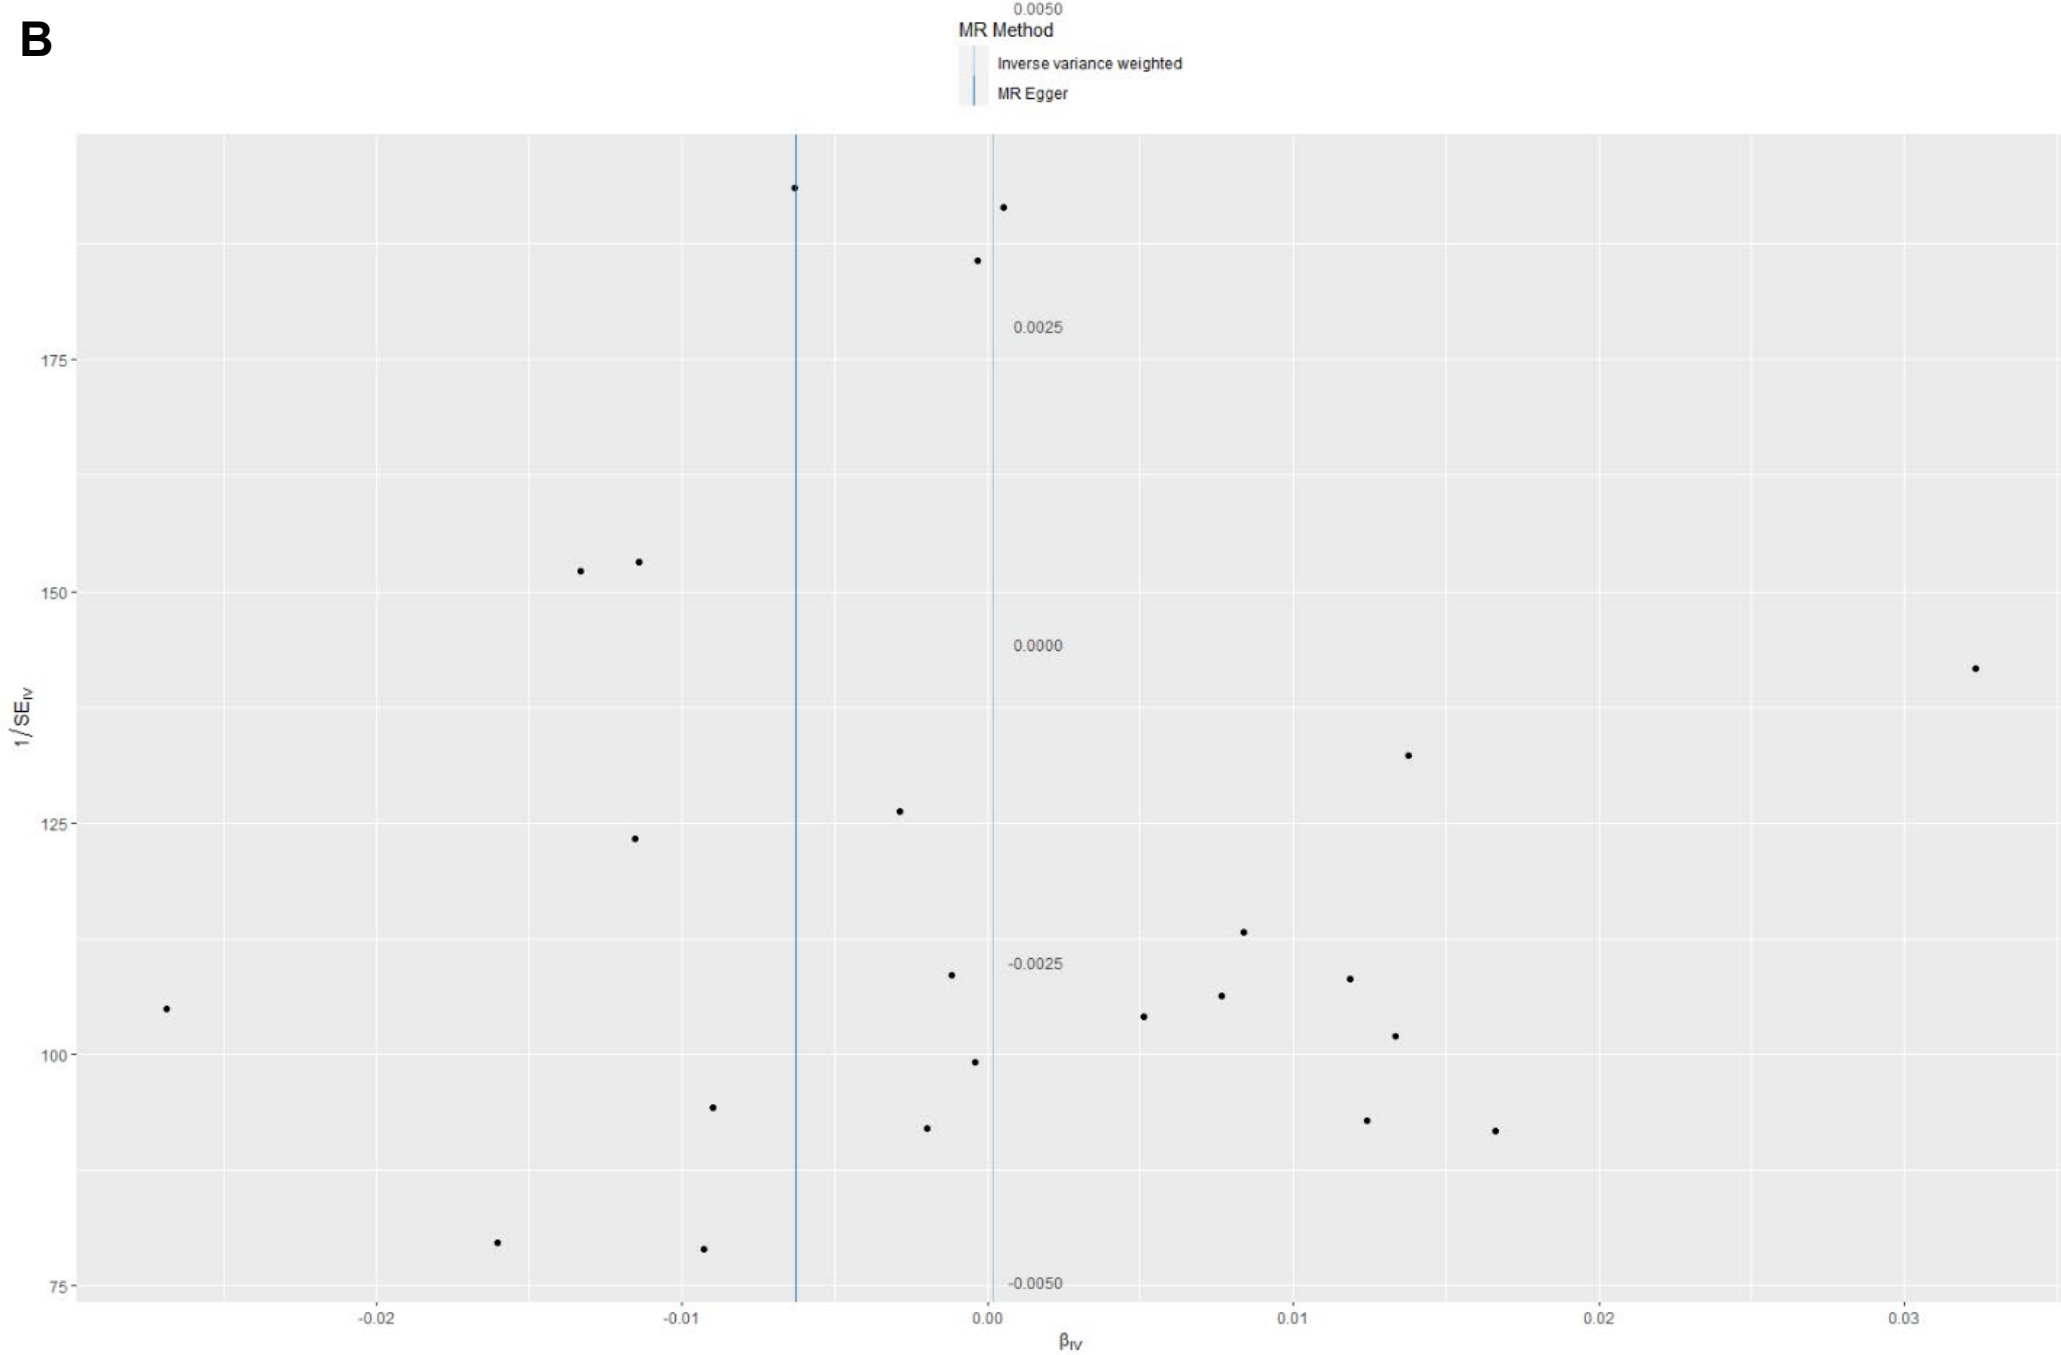

Supplementary Figure 5. Scatter plot (A) and funnel plot (B) of the causal effect of endometriosis on breast cancer.

**A**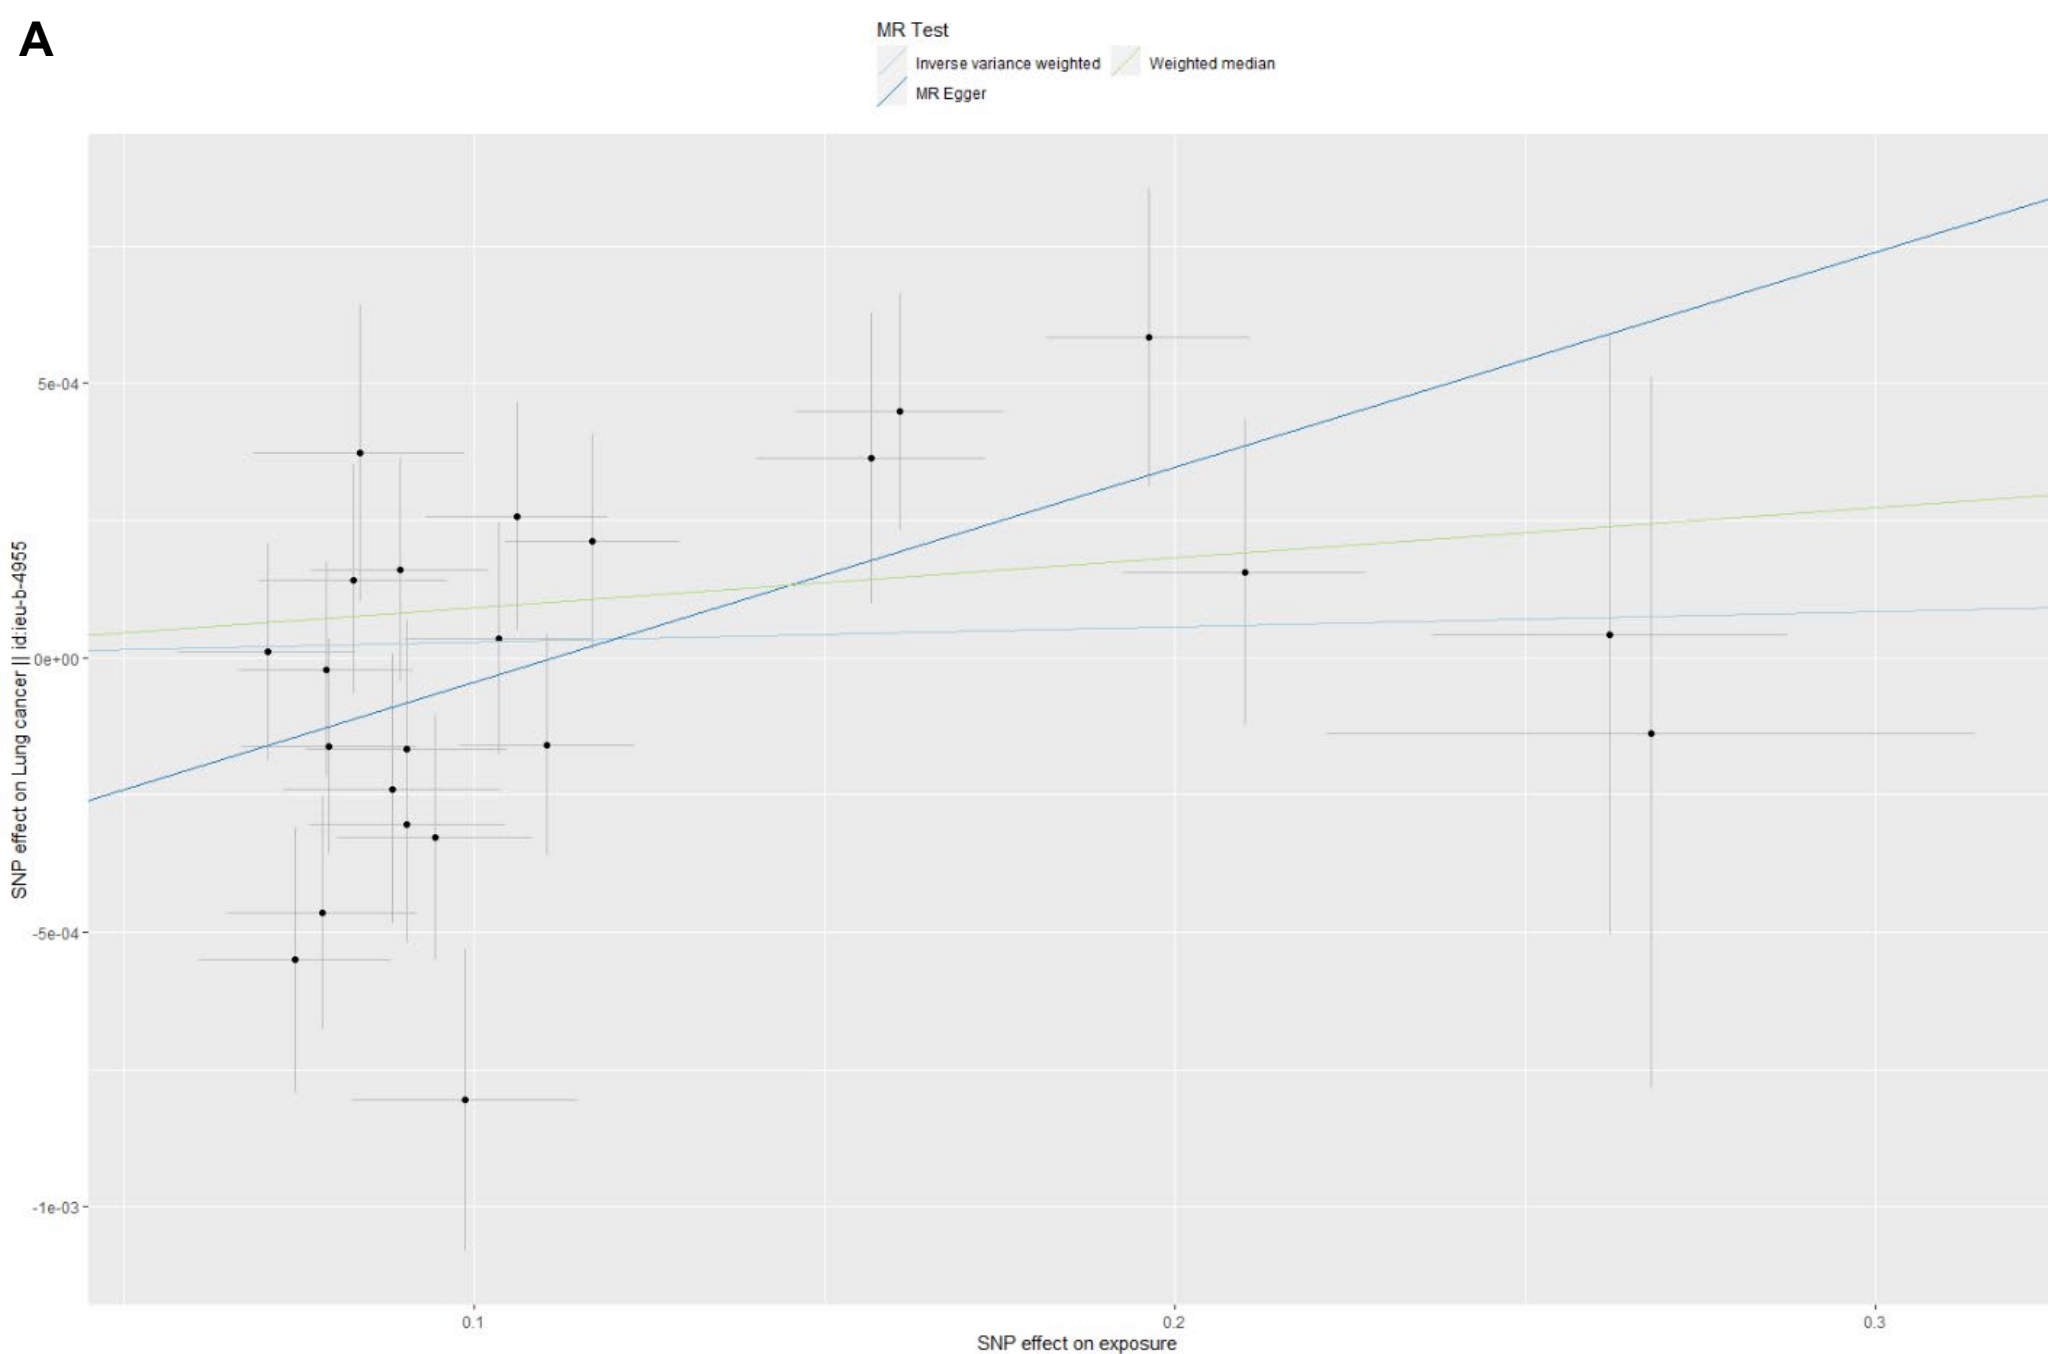

Supplementary Figure 6. Scatter plot (A) and funnel plot (B) of the causal effect of endometriosis on lung cancer.

**B**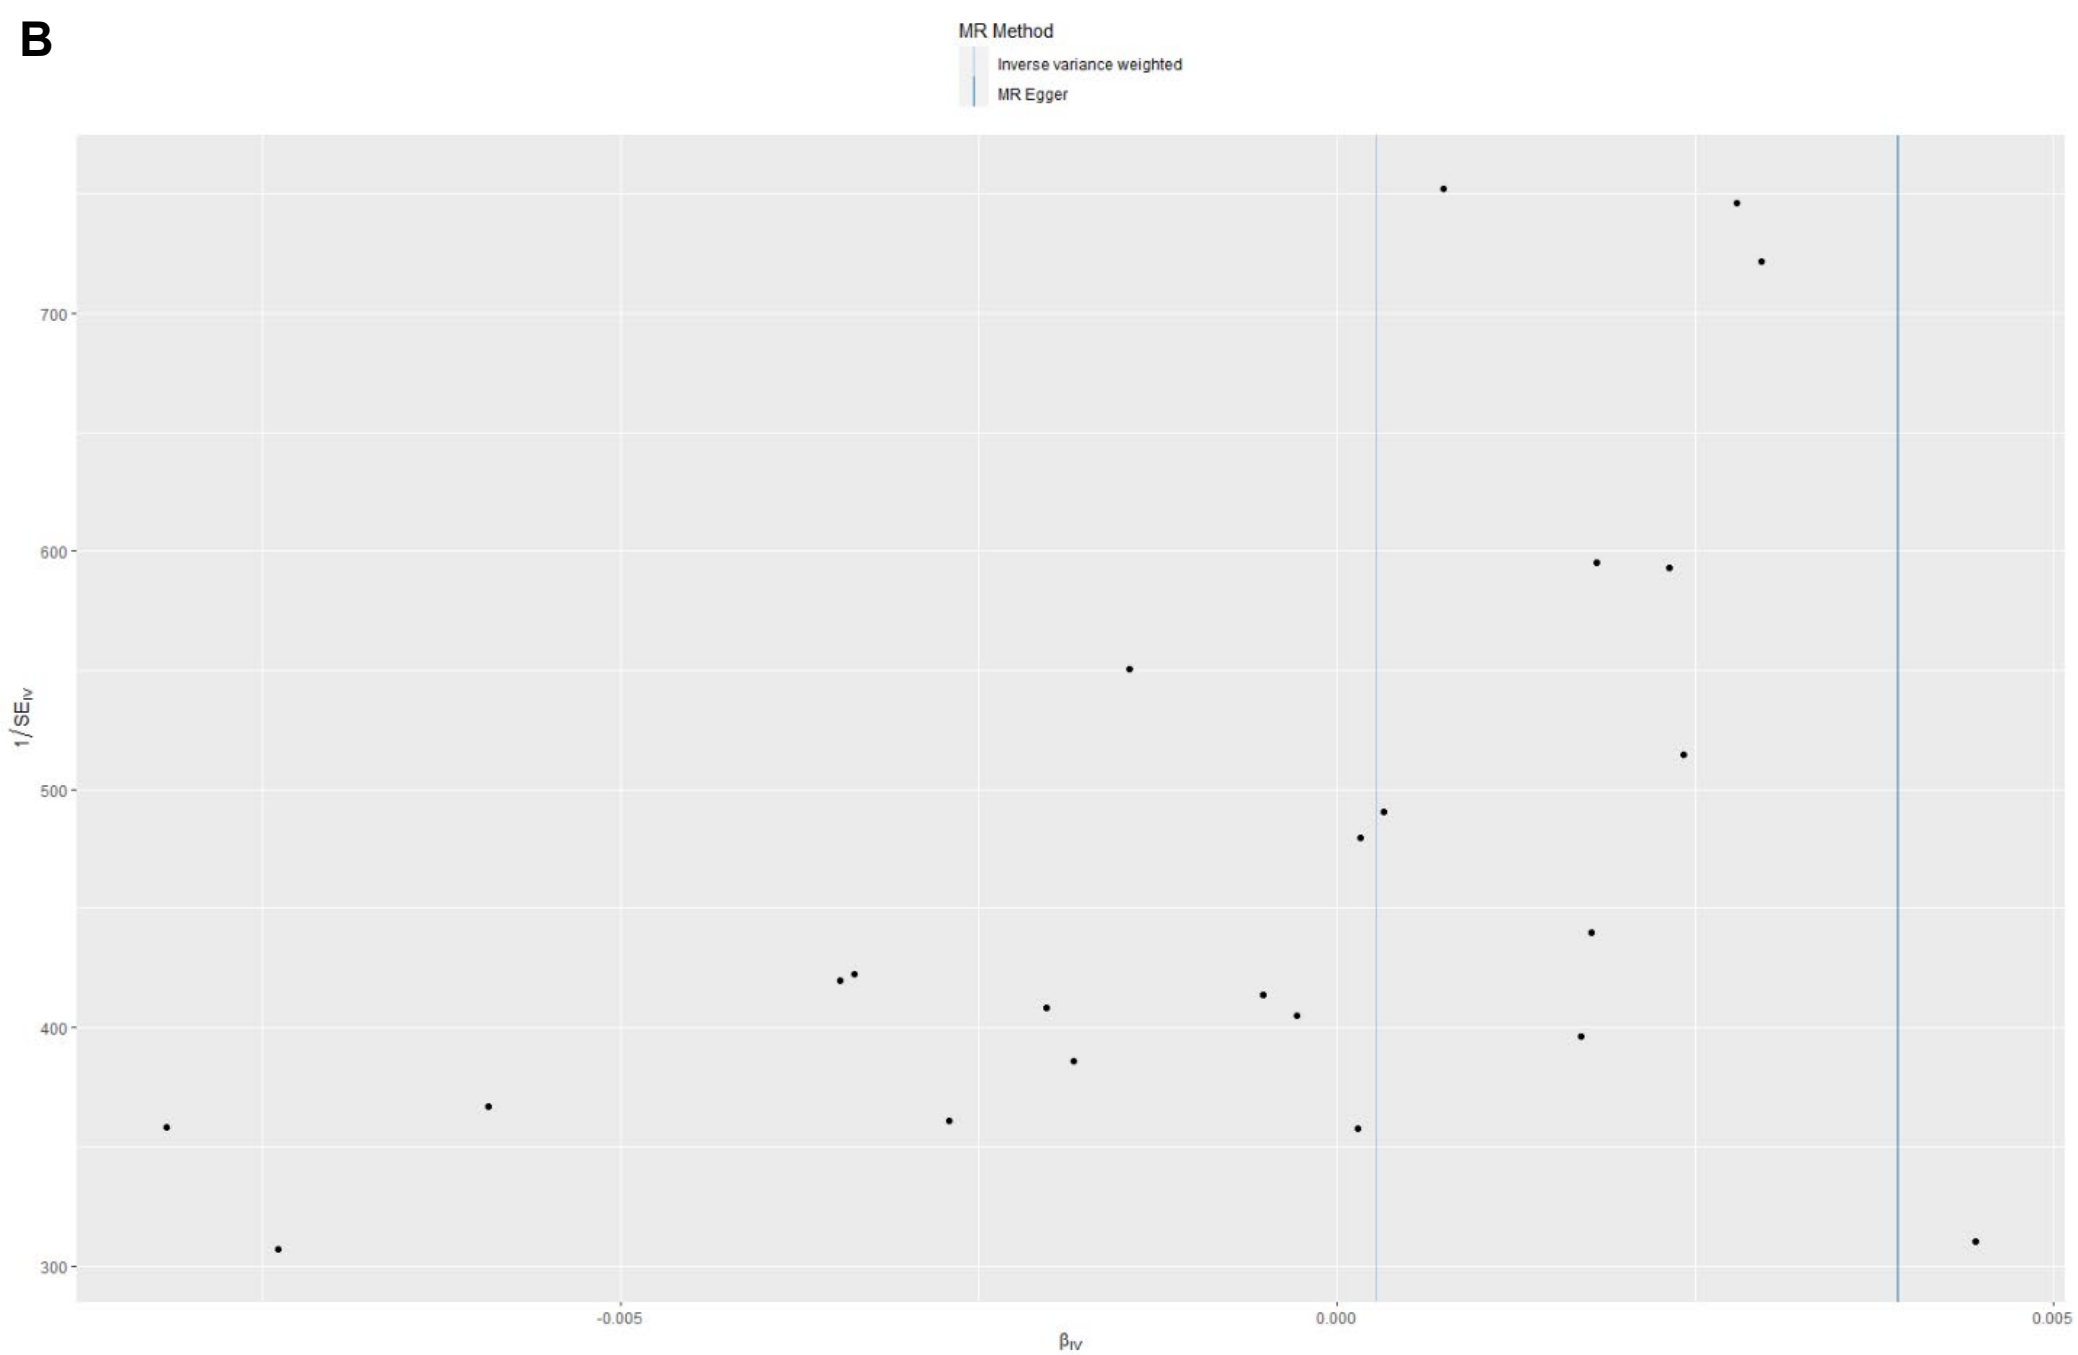

Supplementary Figure 6. Scatter plot (A) and funnel plot (B) of the causal effect of endometriosis on lung cancer.

**A**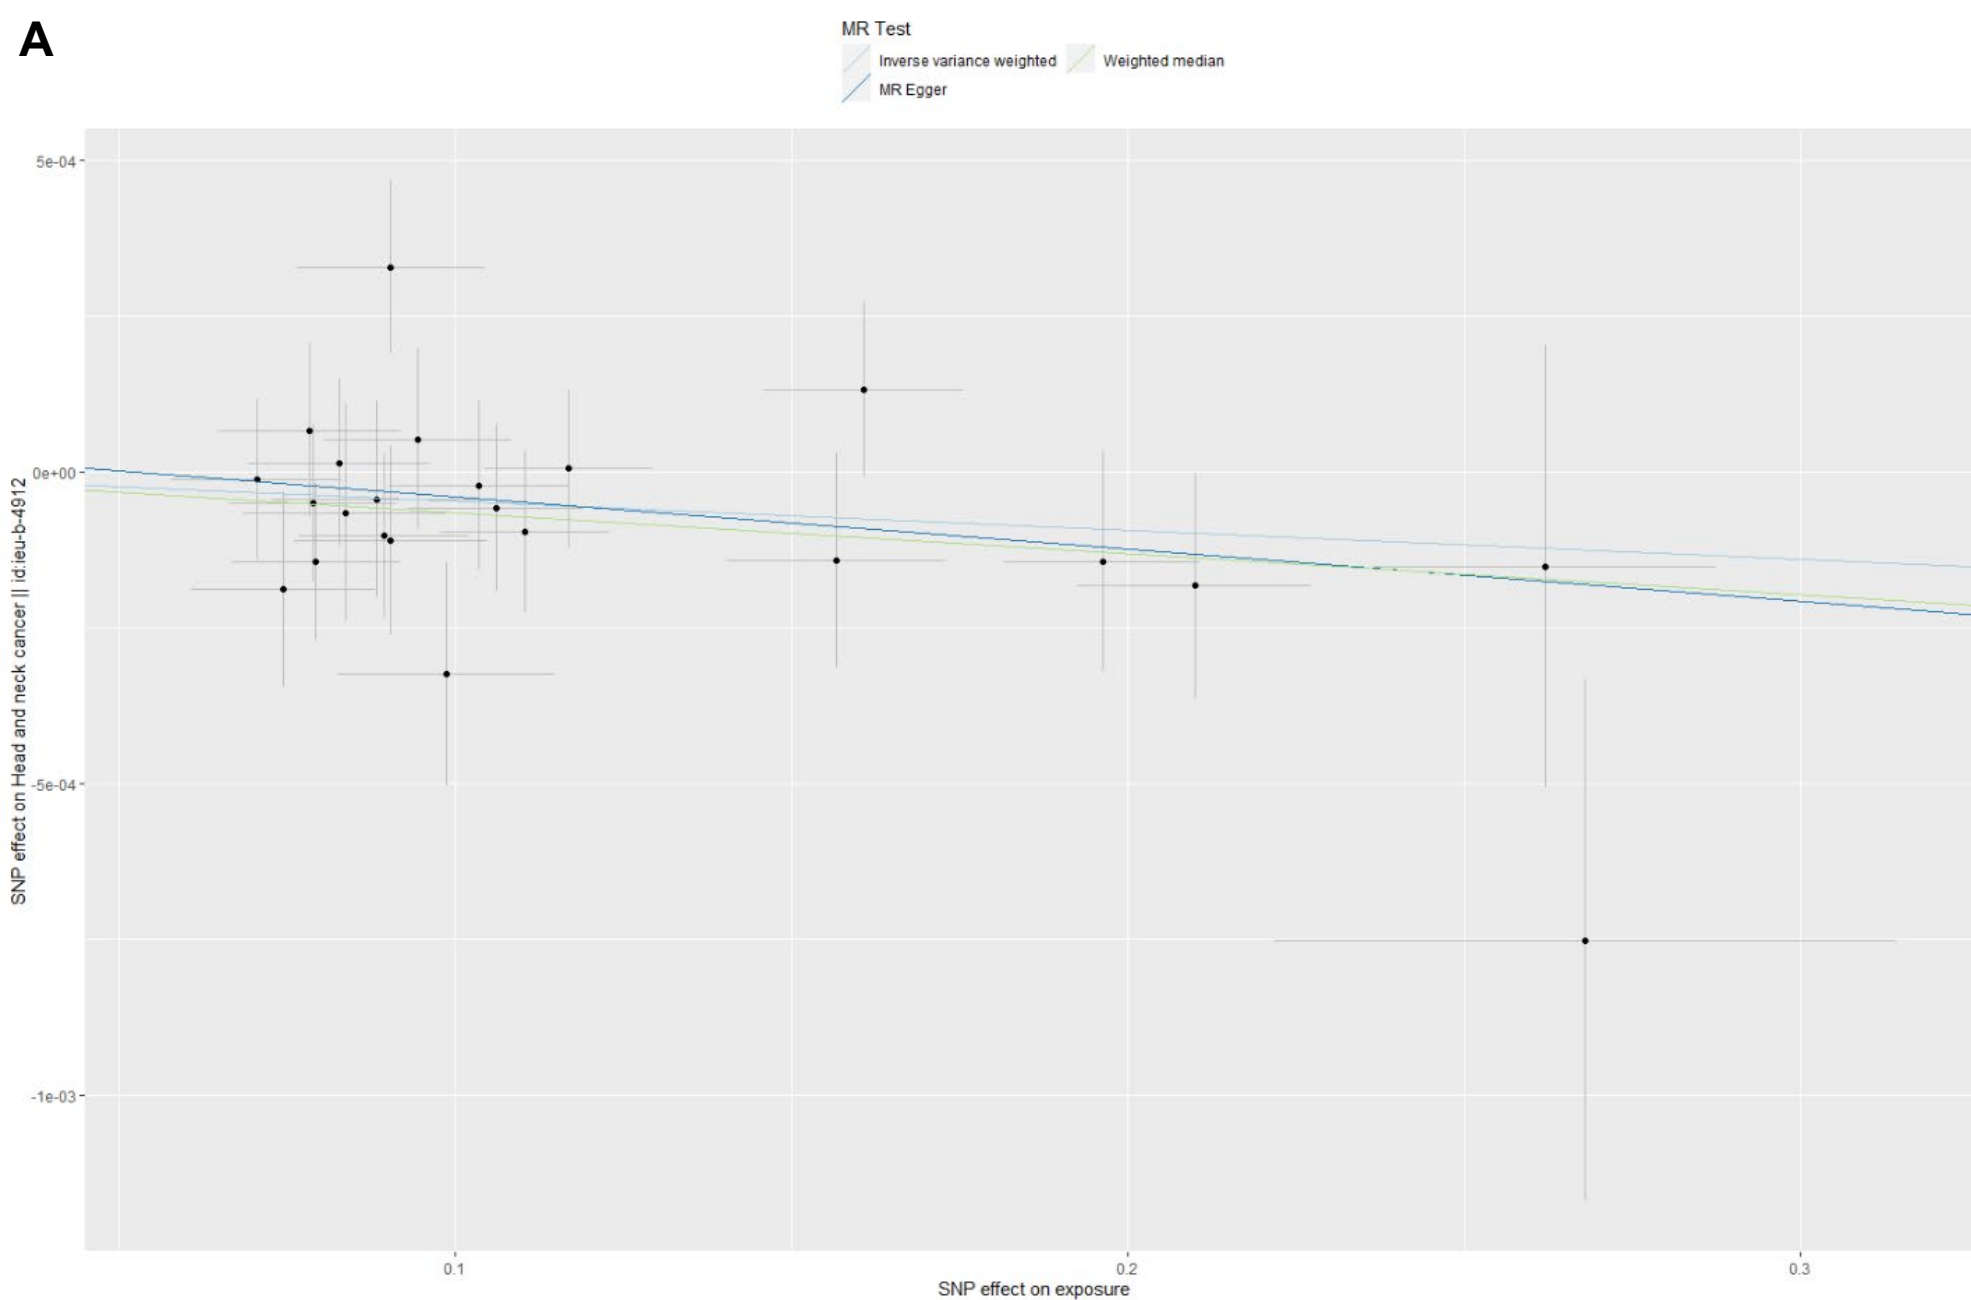

Supplementary Figure 7. Scatter plot (A) and funnel plot (B) of the causal effect of endometriosis on head and neck cancer.

**B**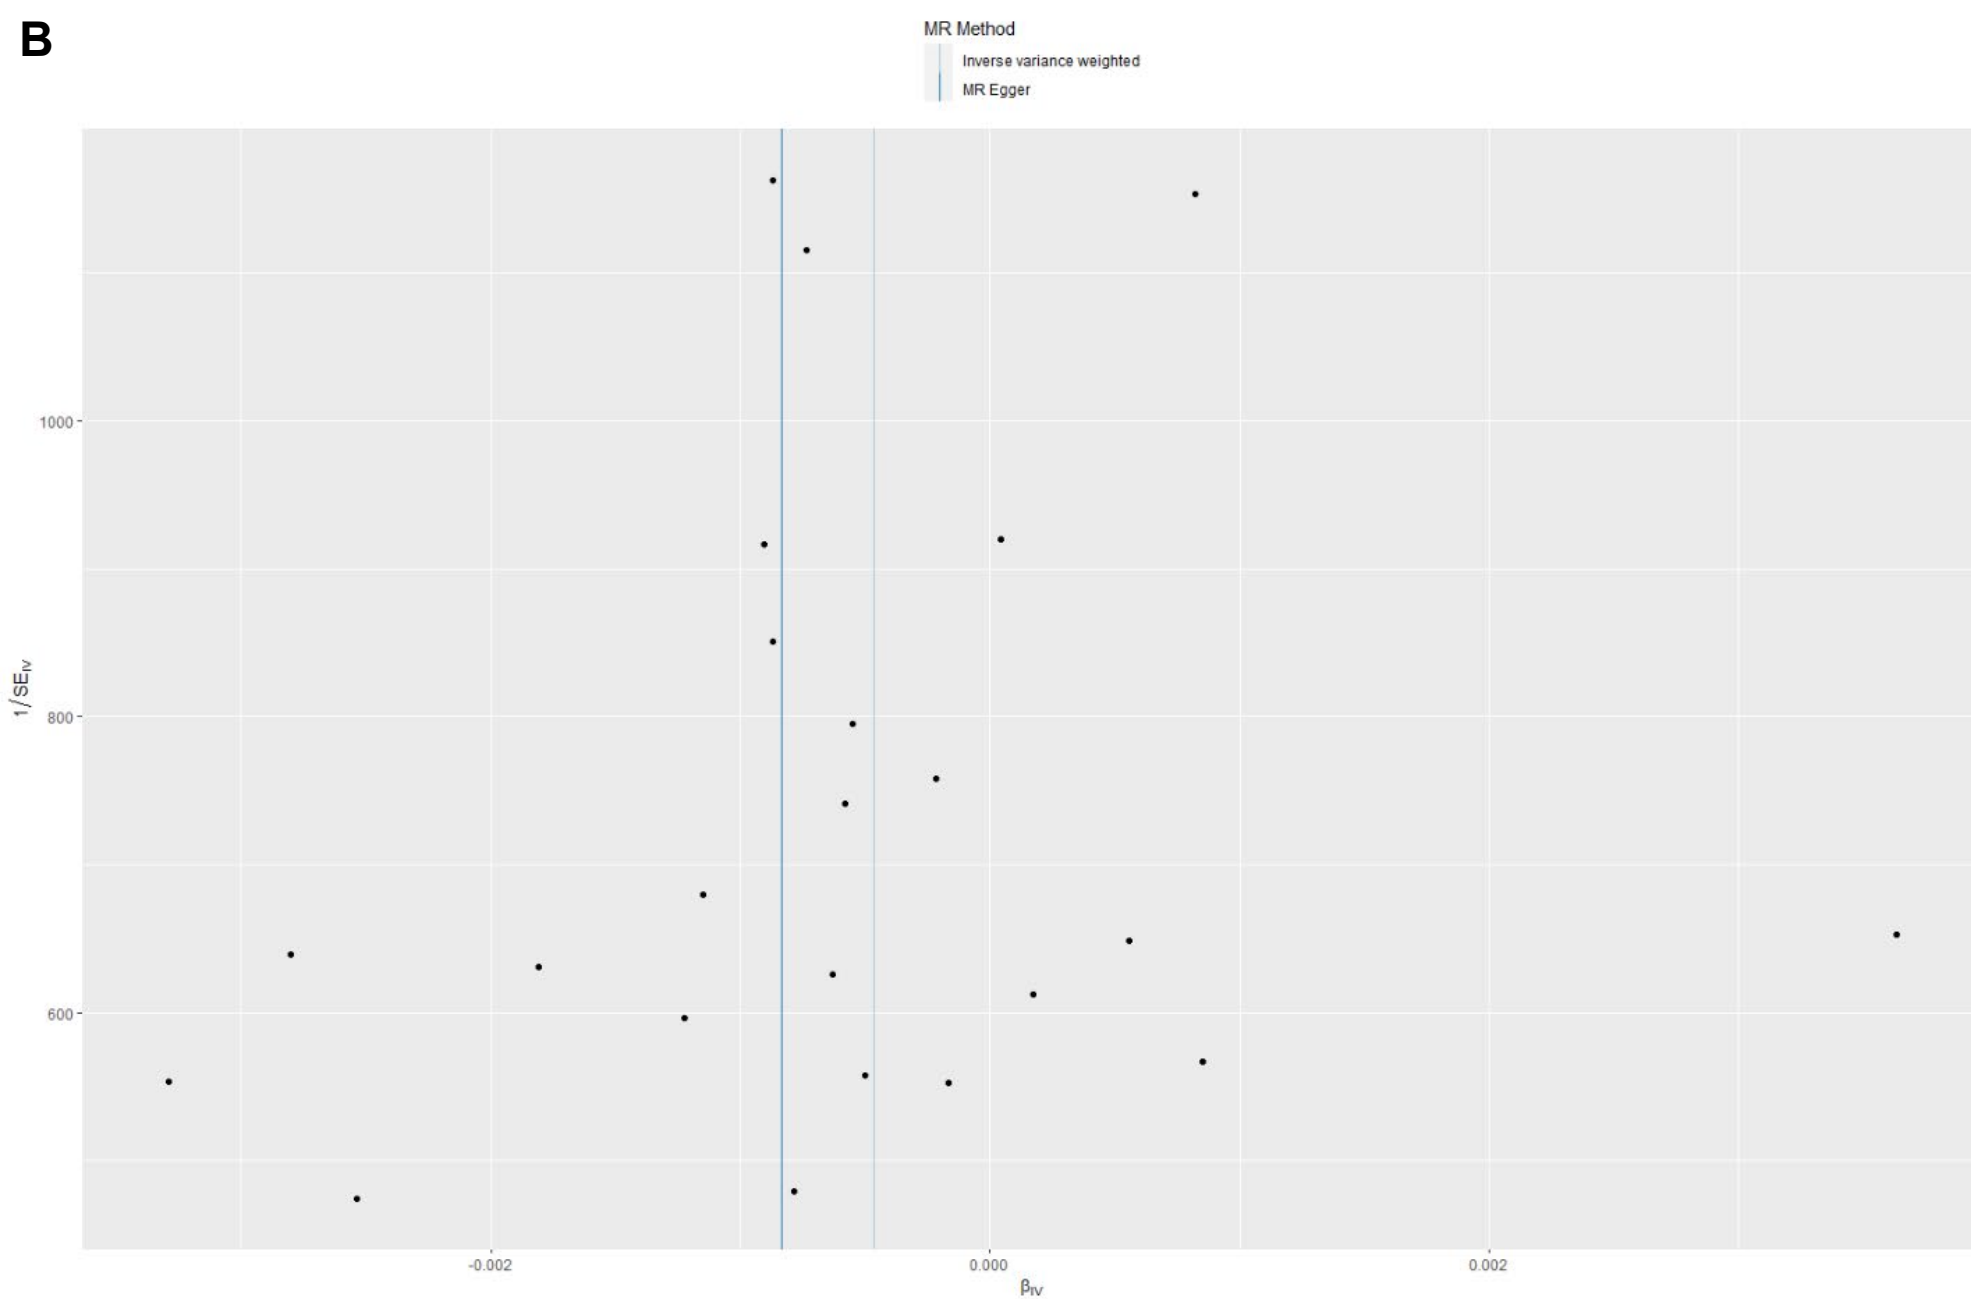

Supplementary Figure 7. Scatter plot (A) and funnel plot (B) of the causal effect of endometriosis on head and neck cancer.

**A**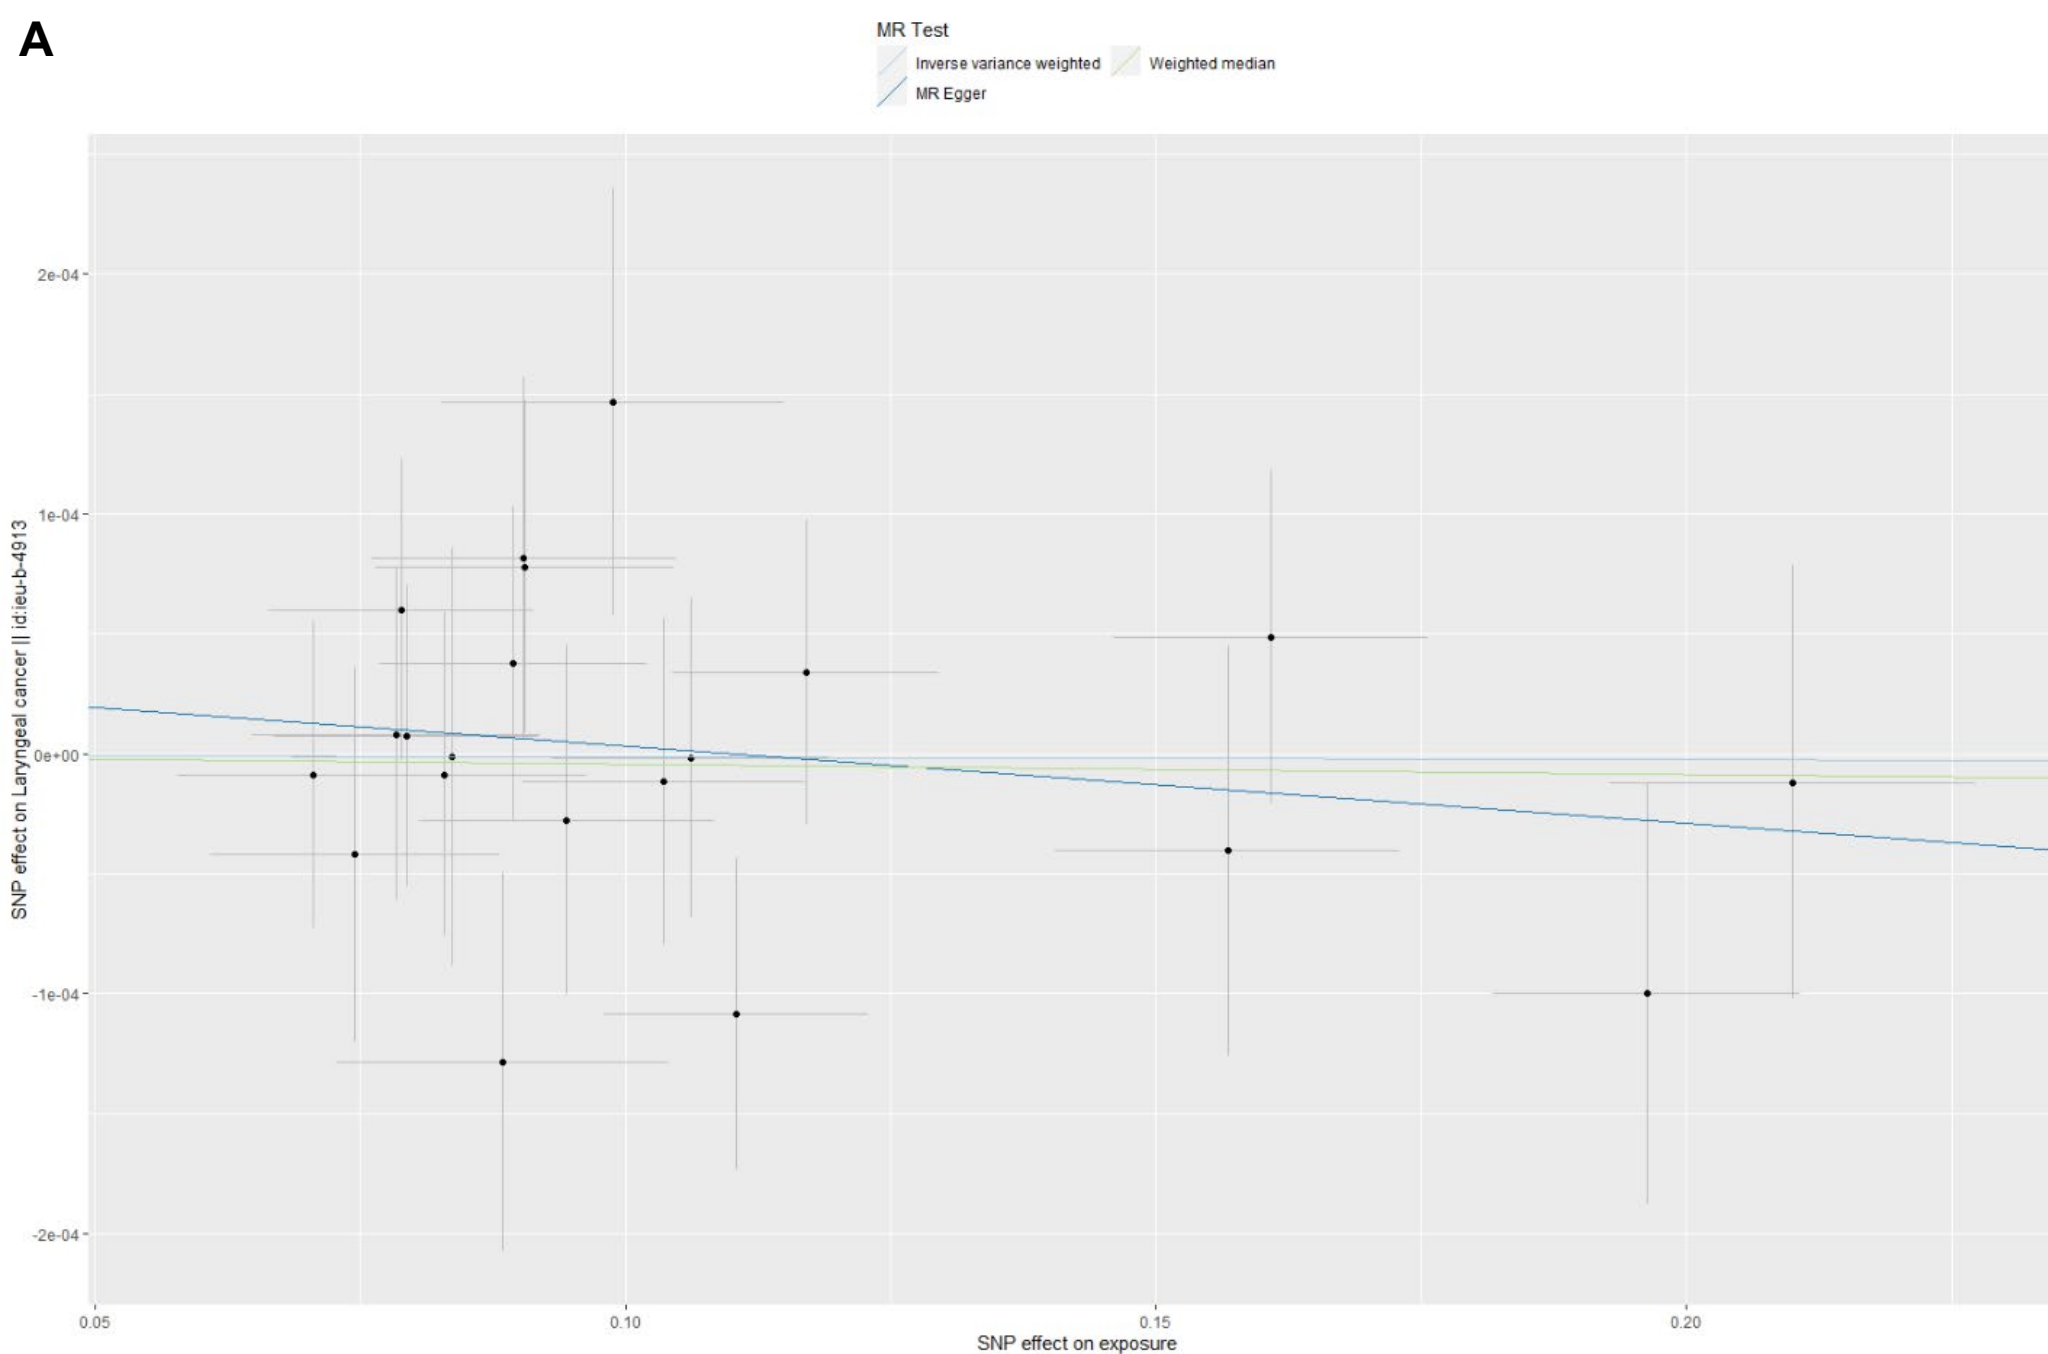

Supplementary Figure 8. Scatter plot (A) and funnel plot (B) of the causal effect of endometriosis on laryngeal cancer.

**B**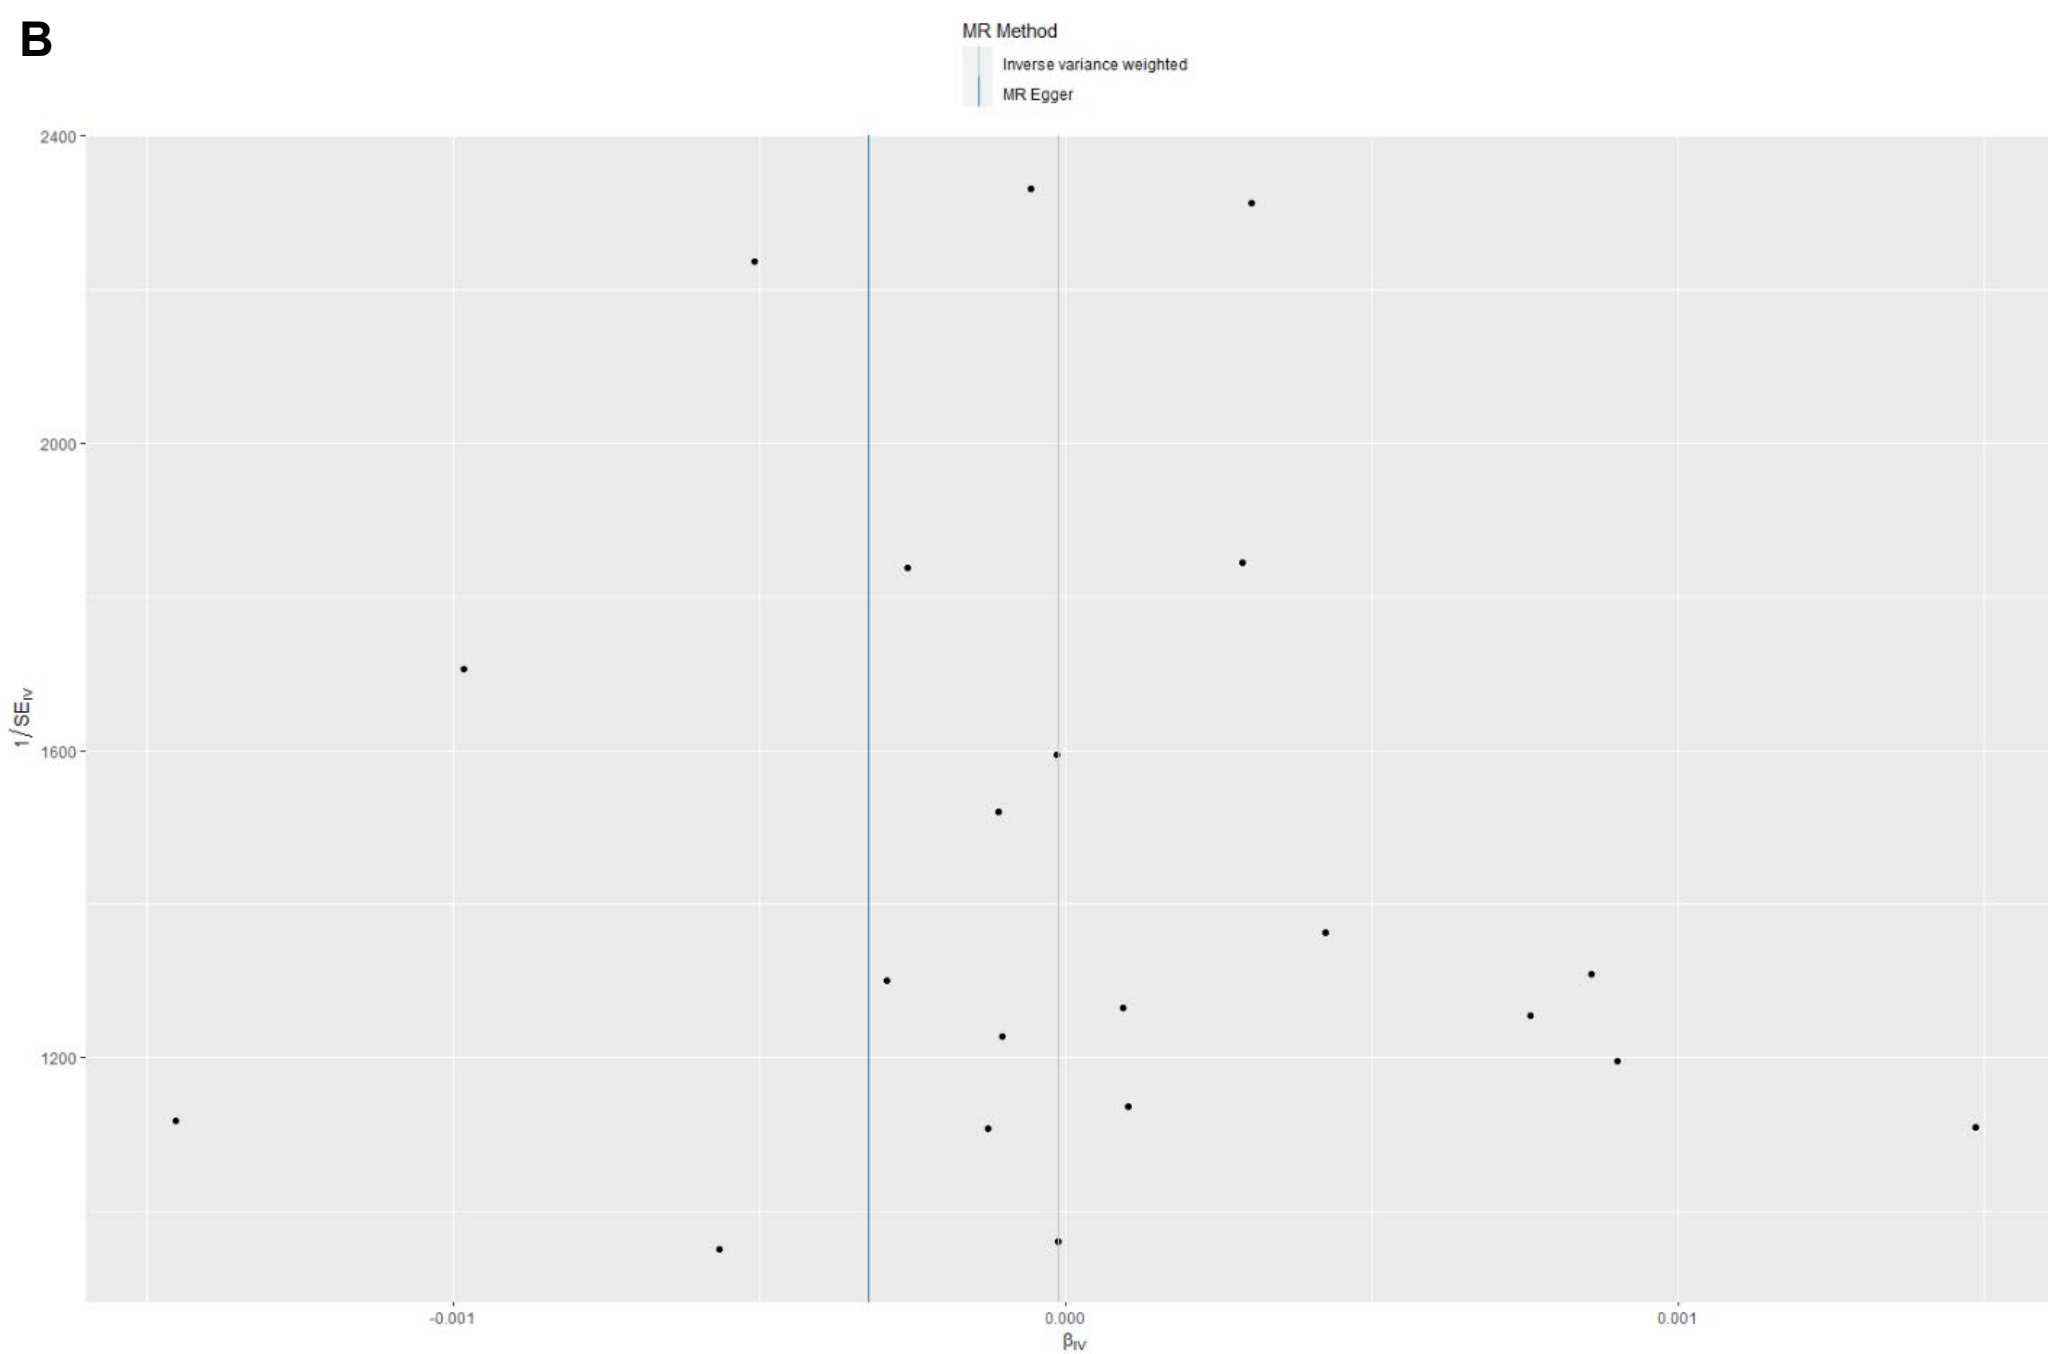

Supplementary Figure 8. Scatter plot (A) and funnel plot (B) of the causal effect of endometriosis on laryngeal cancer.



**A**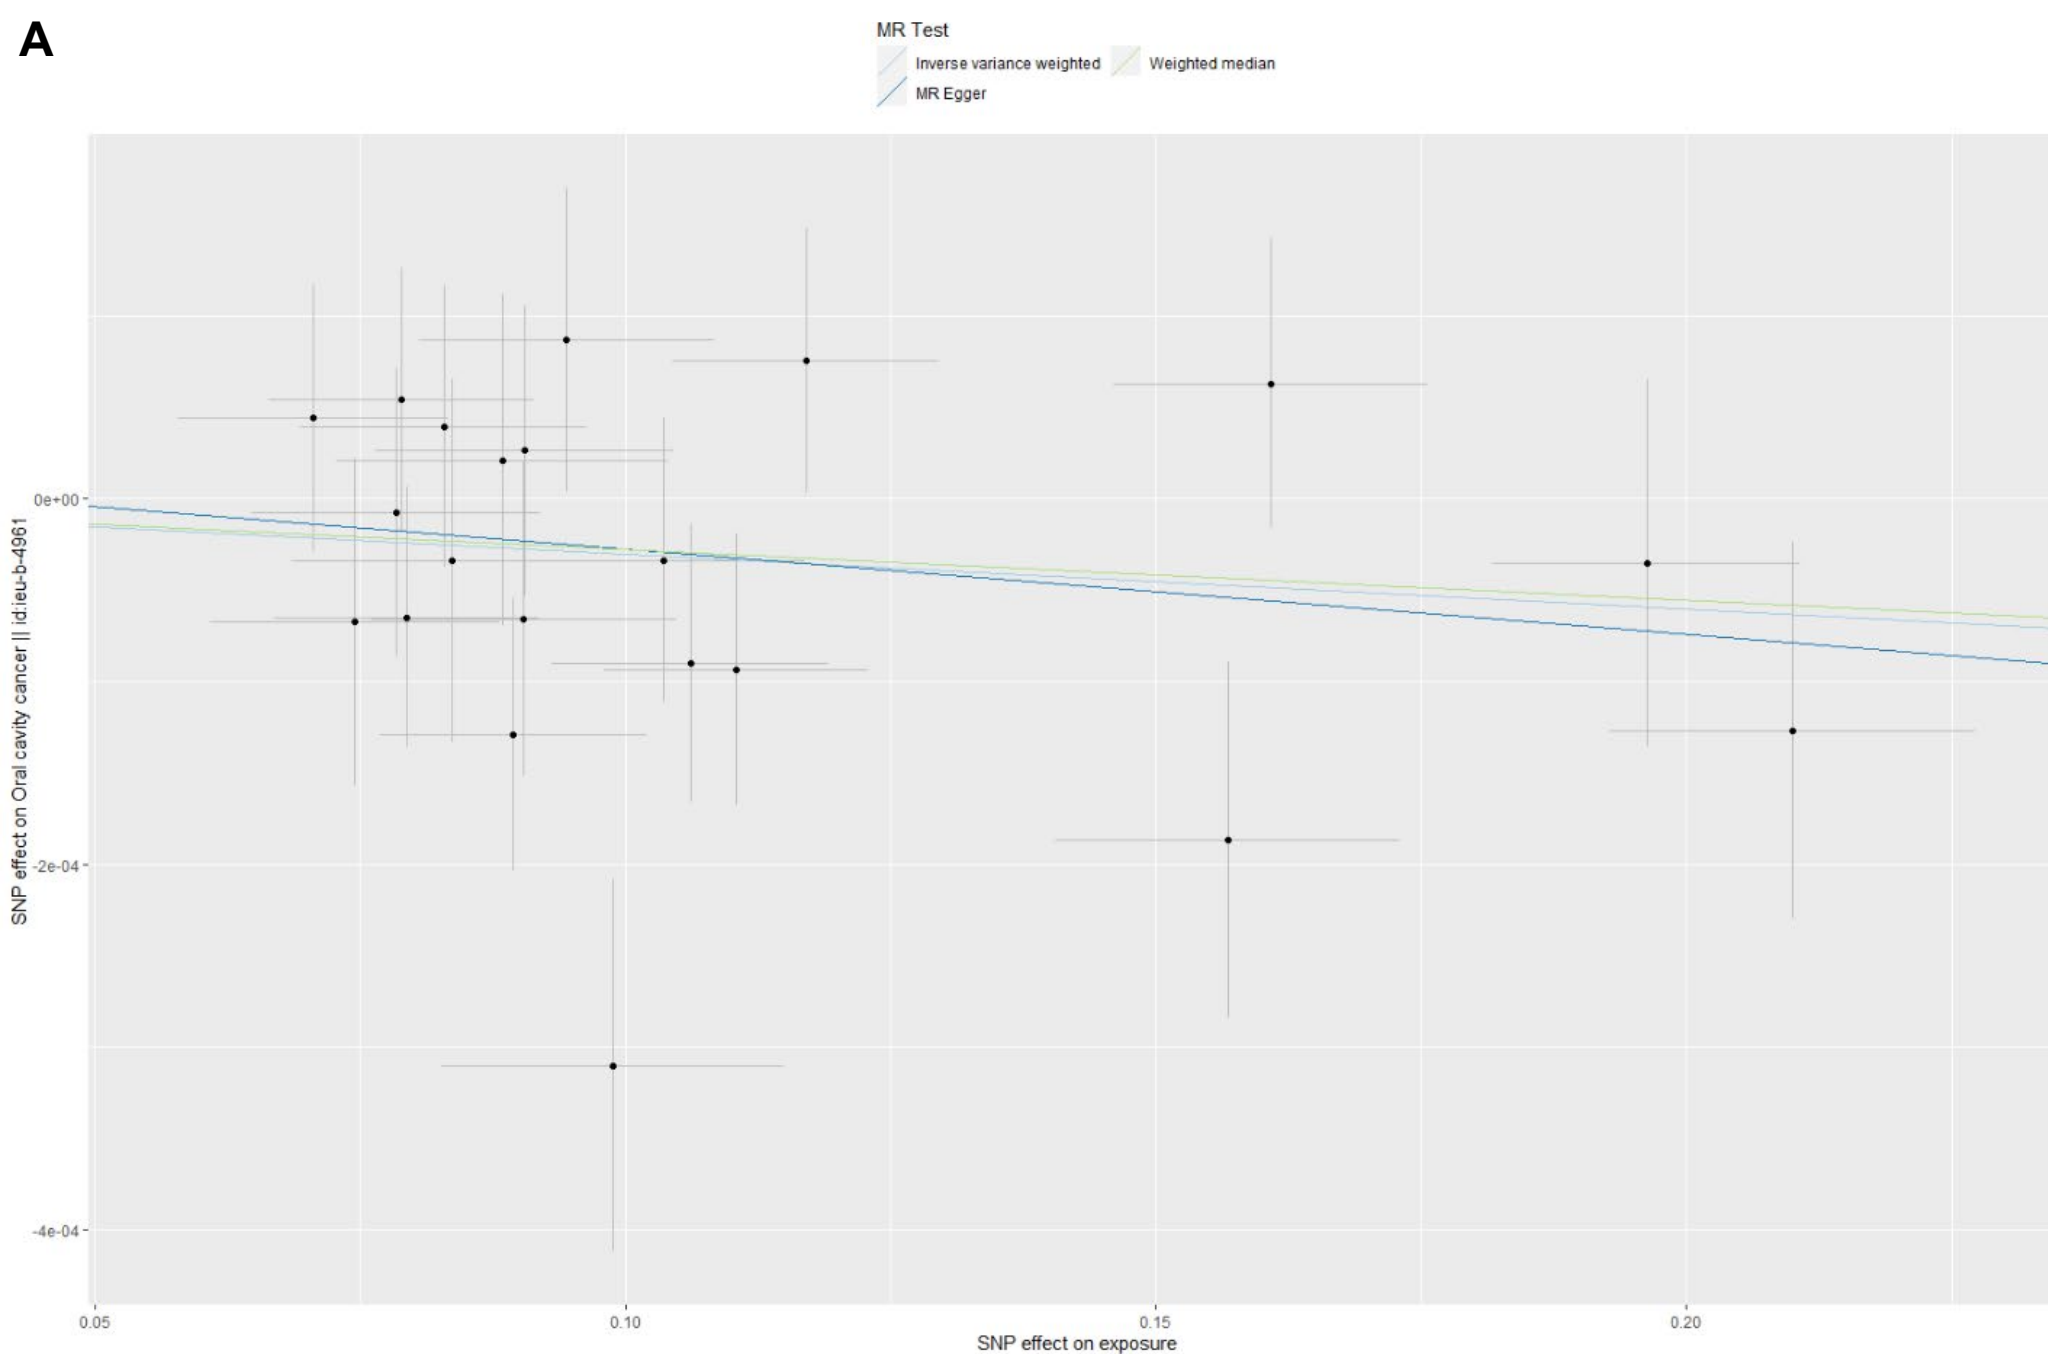

Supplementary Figure 9. Scatter plot (A) and funnel plot (B) of the causal effect of endometriosis on oral cavity cancer.

**B**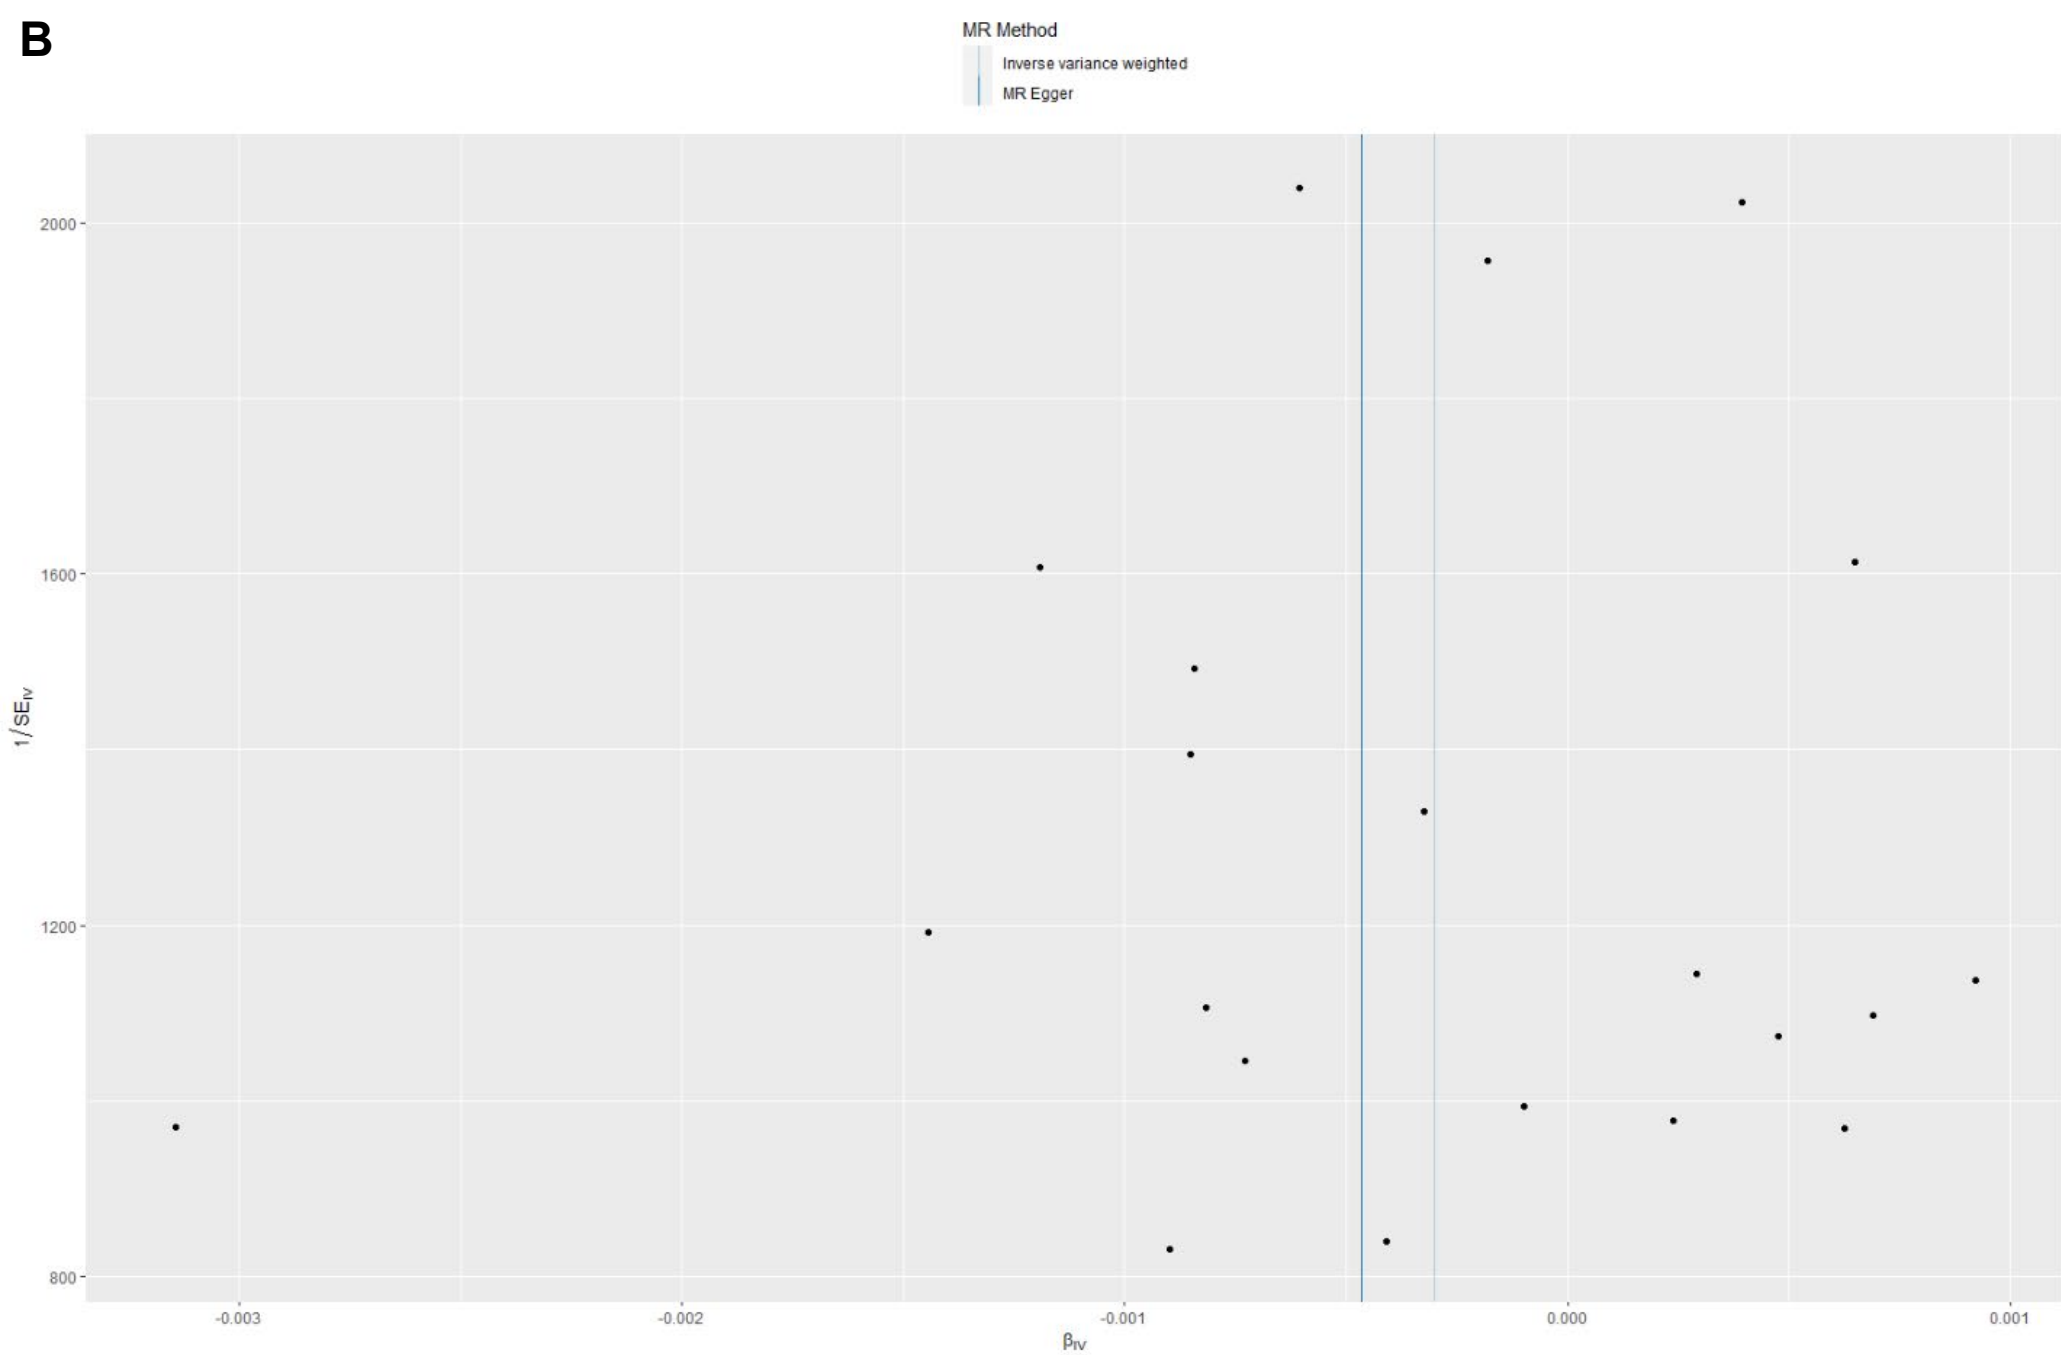

Supplementary Figure 9. Scatter plot (A) and funnel plot (B) of the causal effect of endometriosis on oral cavity cancer.

**A**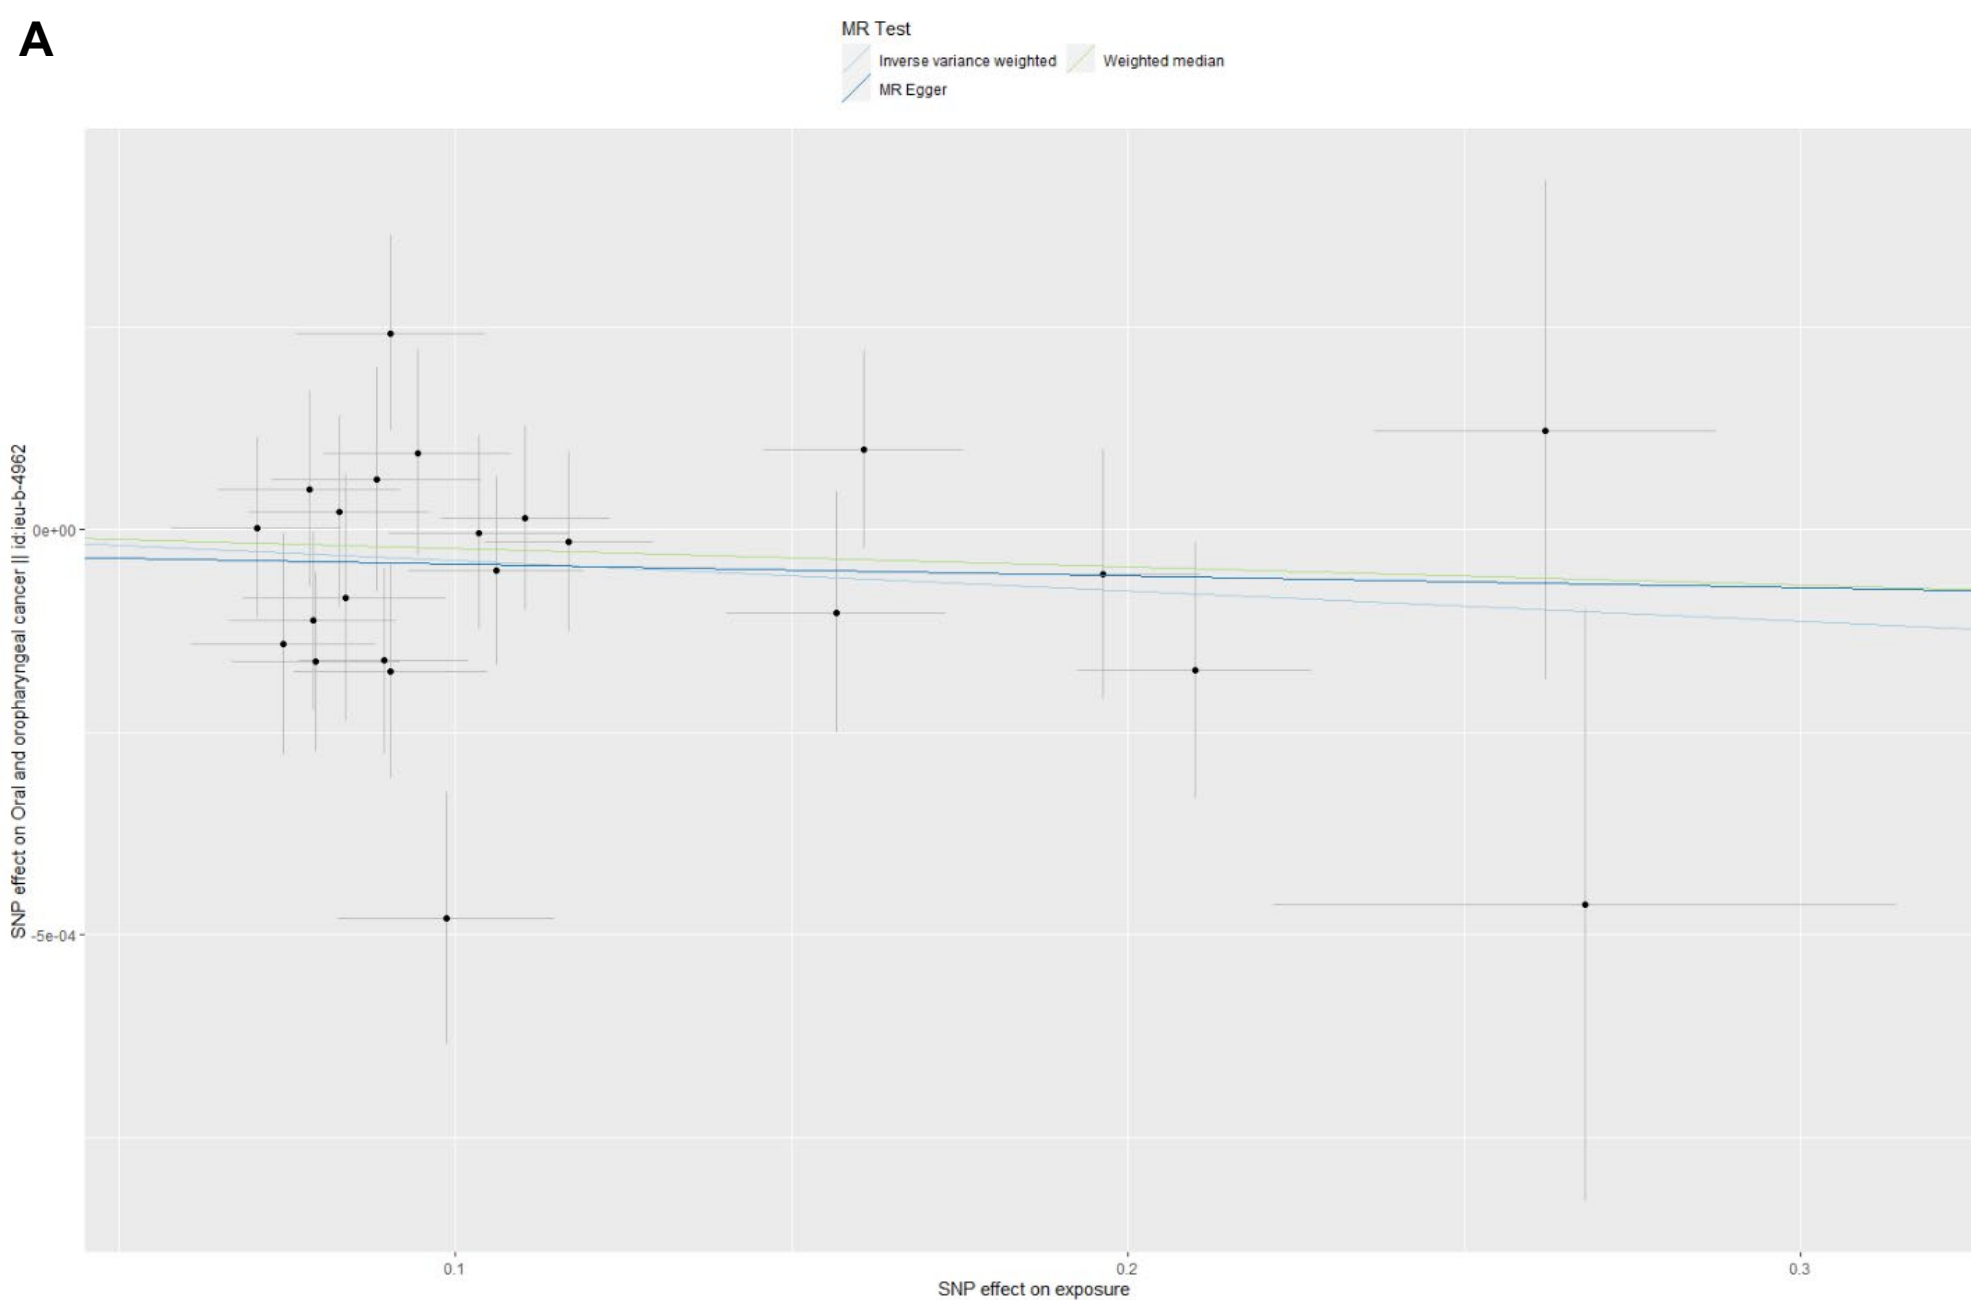

Supplementary Figure 10. Scatter plot (A) and funnel plot (B) of the causal effect of endometriosis on oral and oropharyngeal cancer .

**B**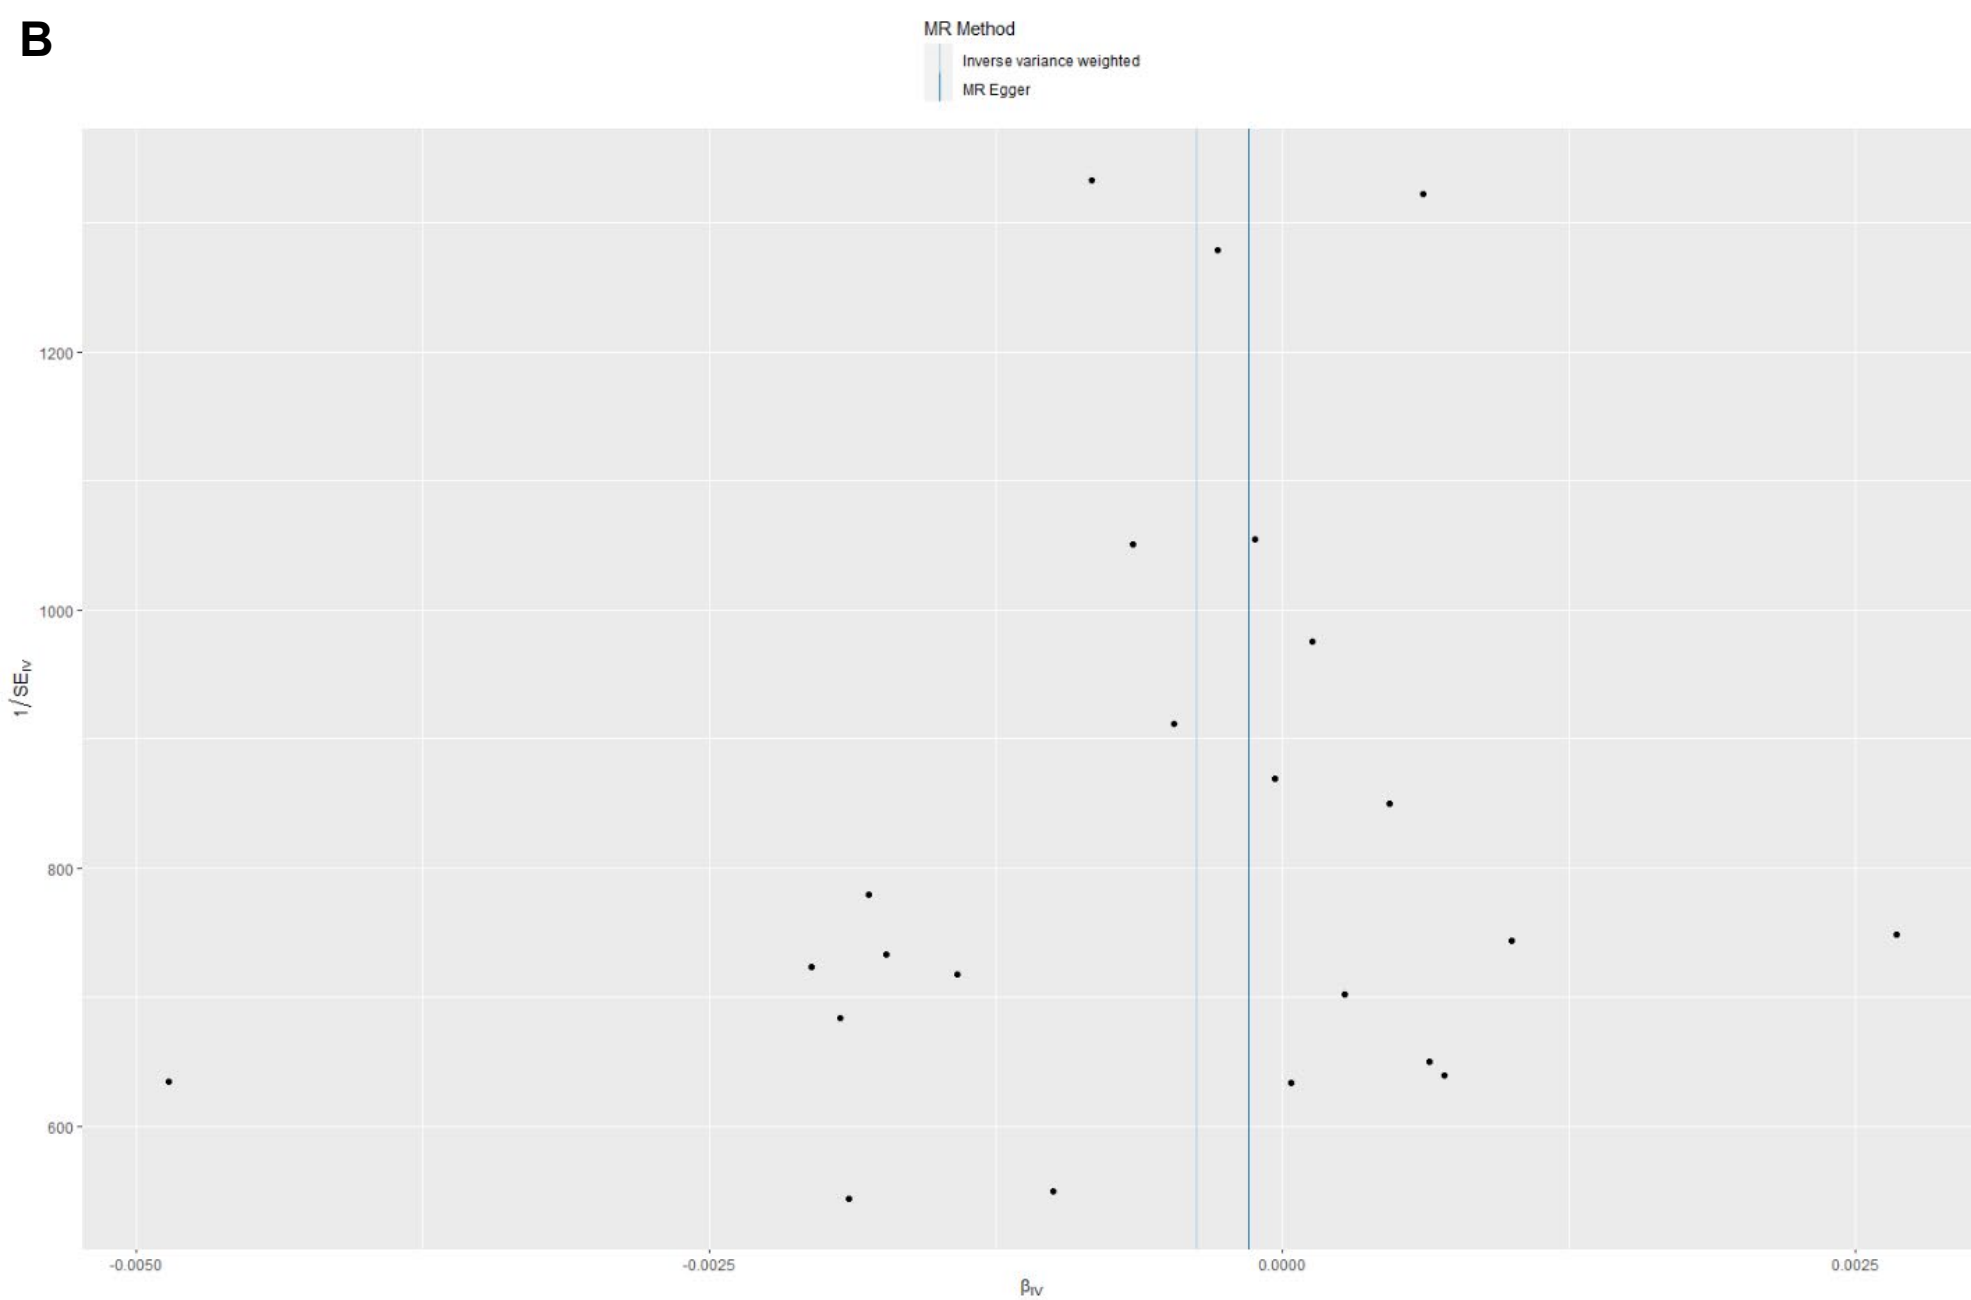

Supplementary Figure 10. Scatter plot (A) and funnel plot (B) of the causal effect of endometriosis on oral and oropharyngeal cancer .

**A**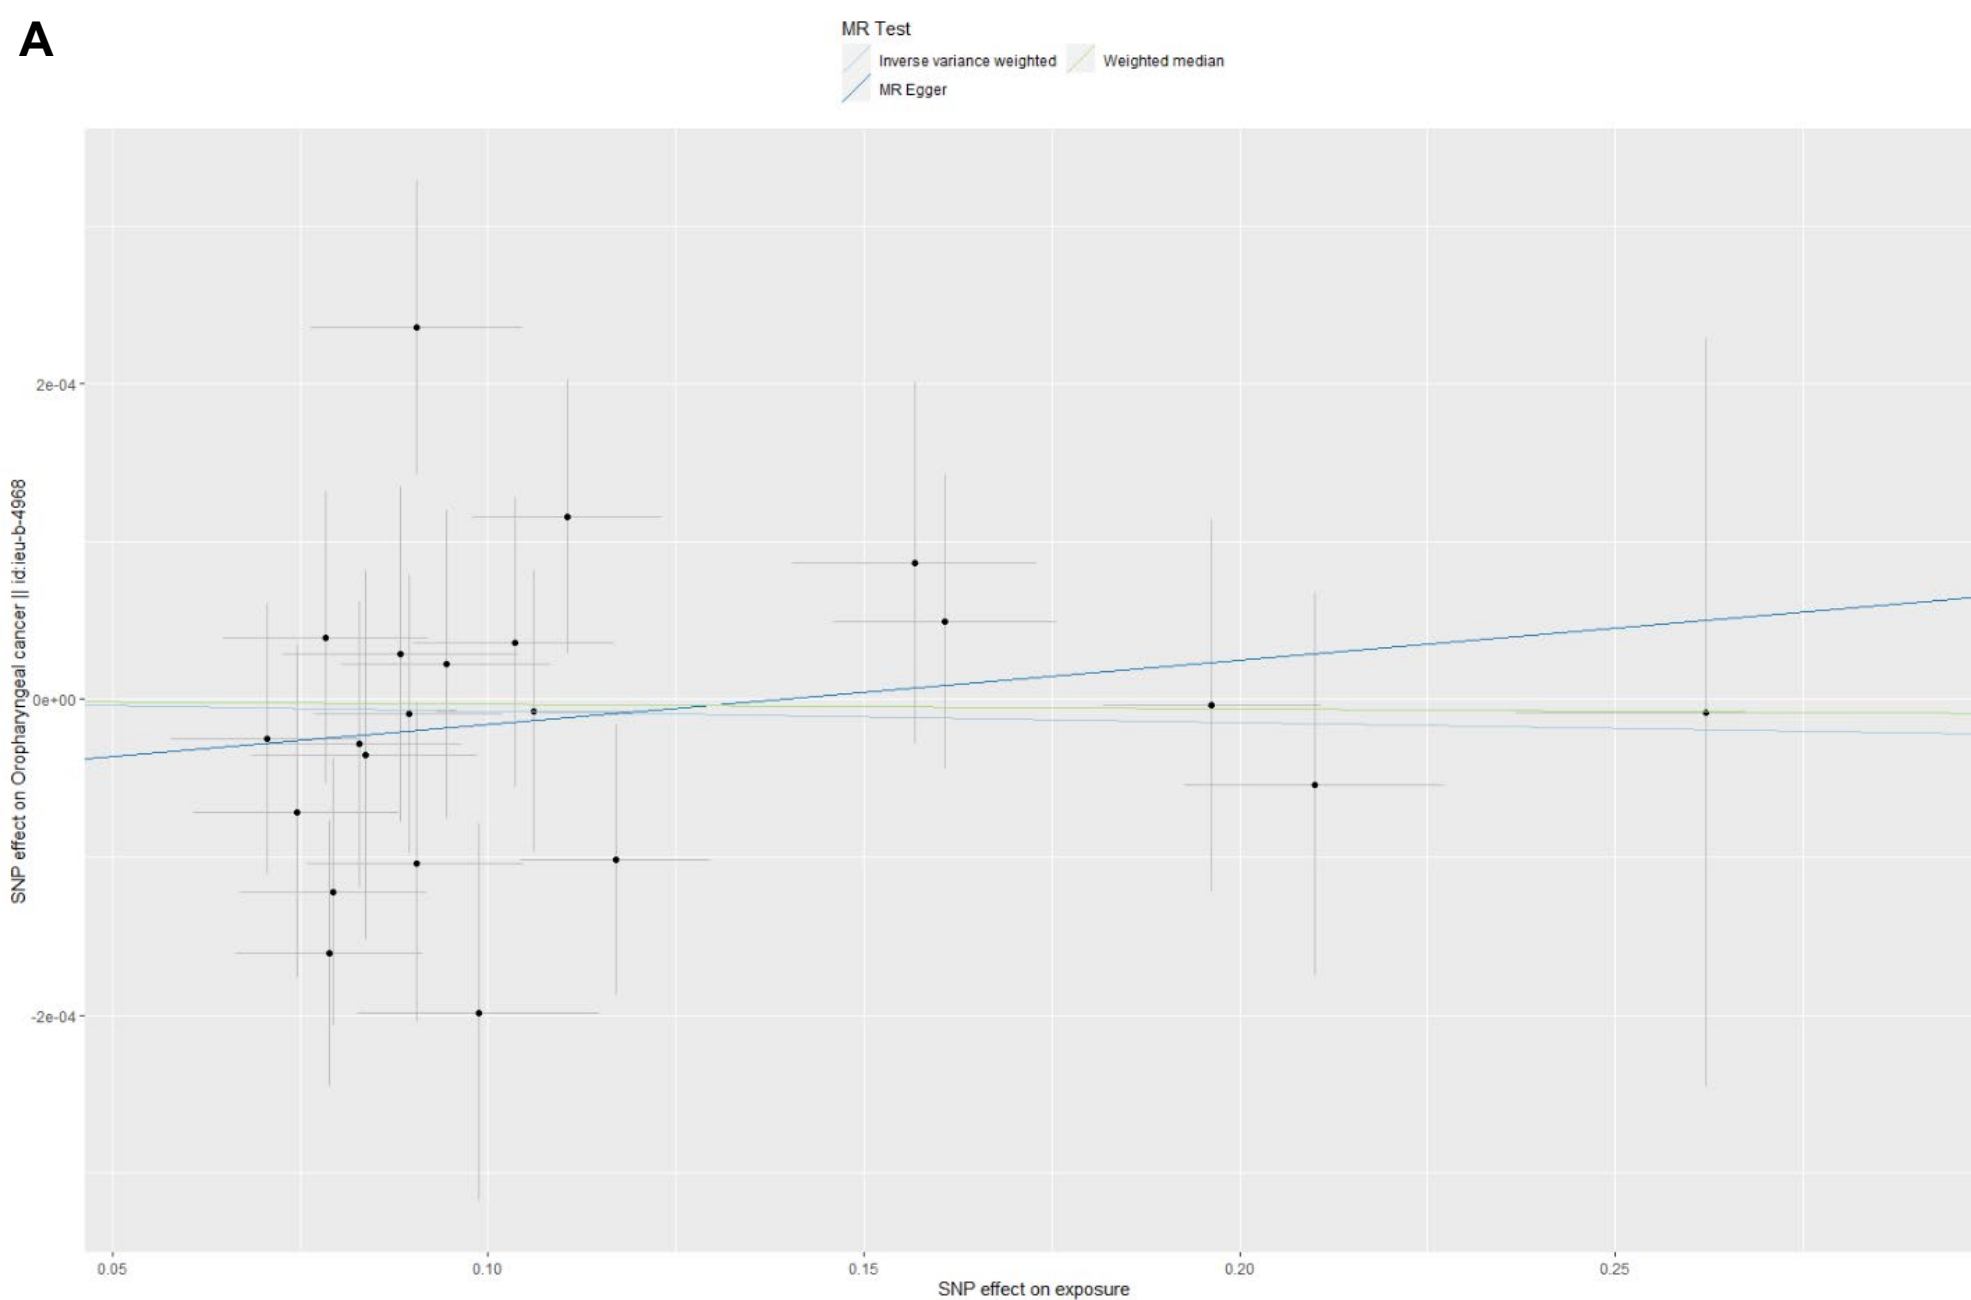

Supplementary Figure 11. Scatter plot (A) and funnel plot (B) of the causal effect of endometriosis on oropharyngeal cancer.

**B**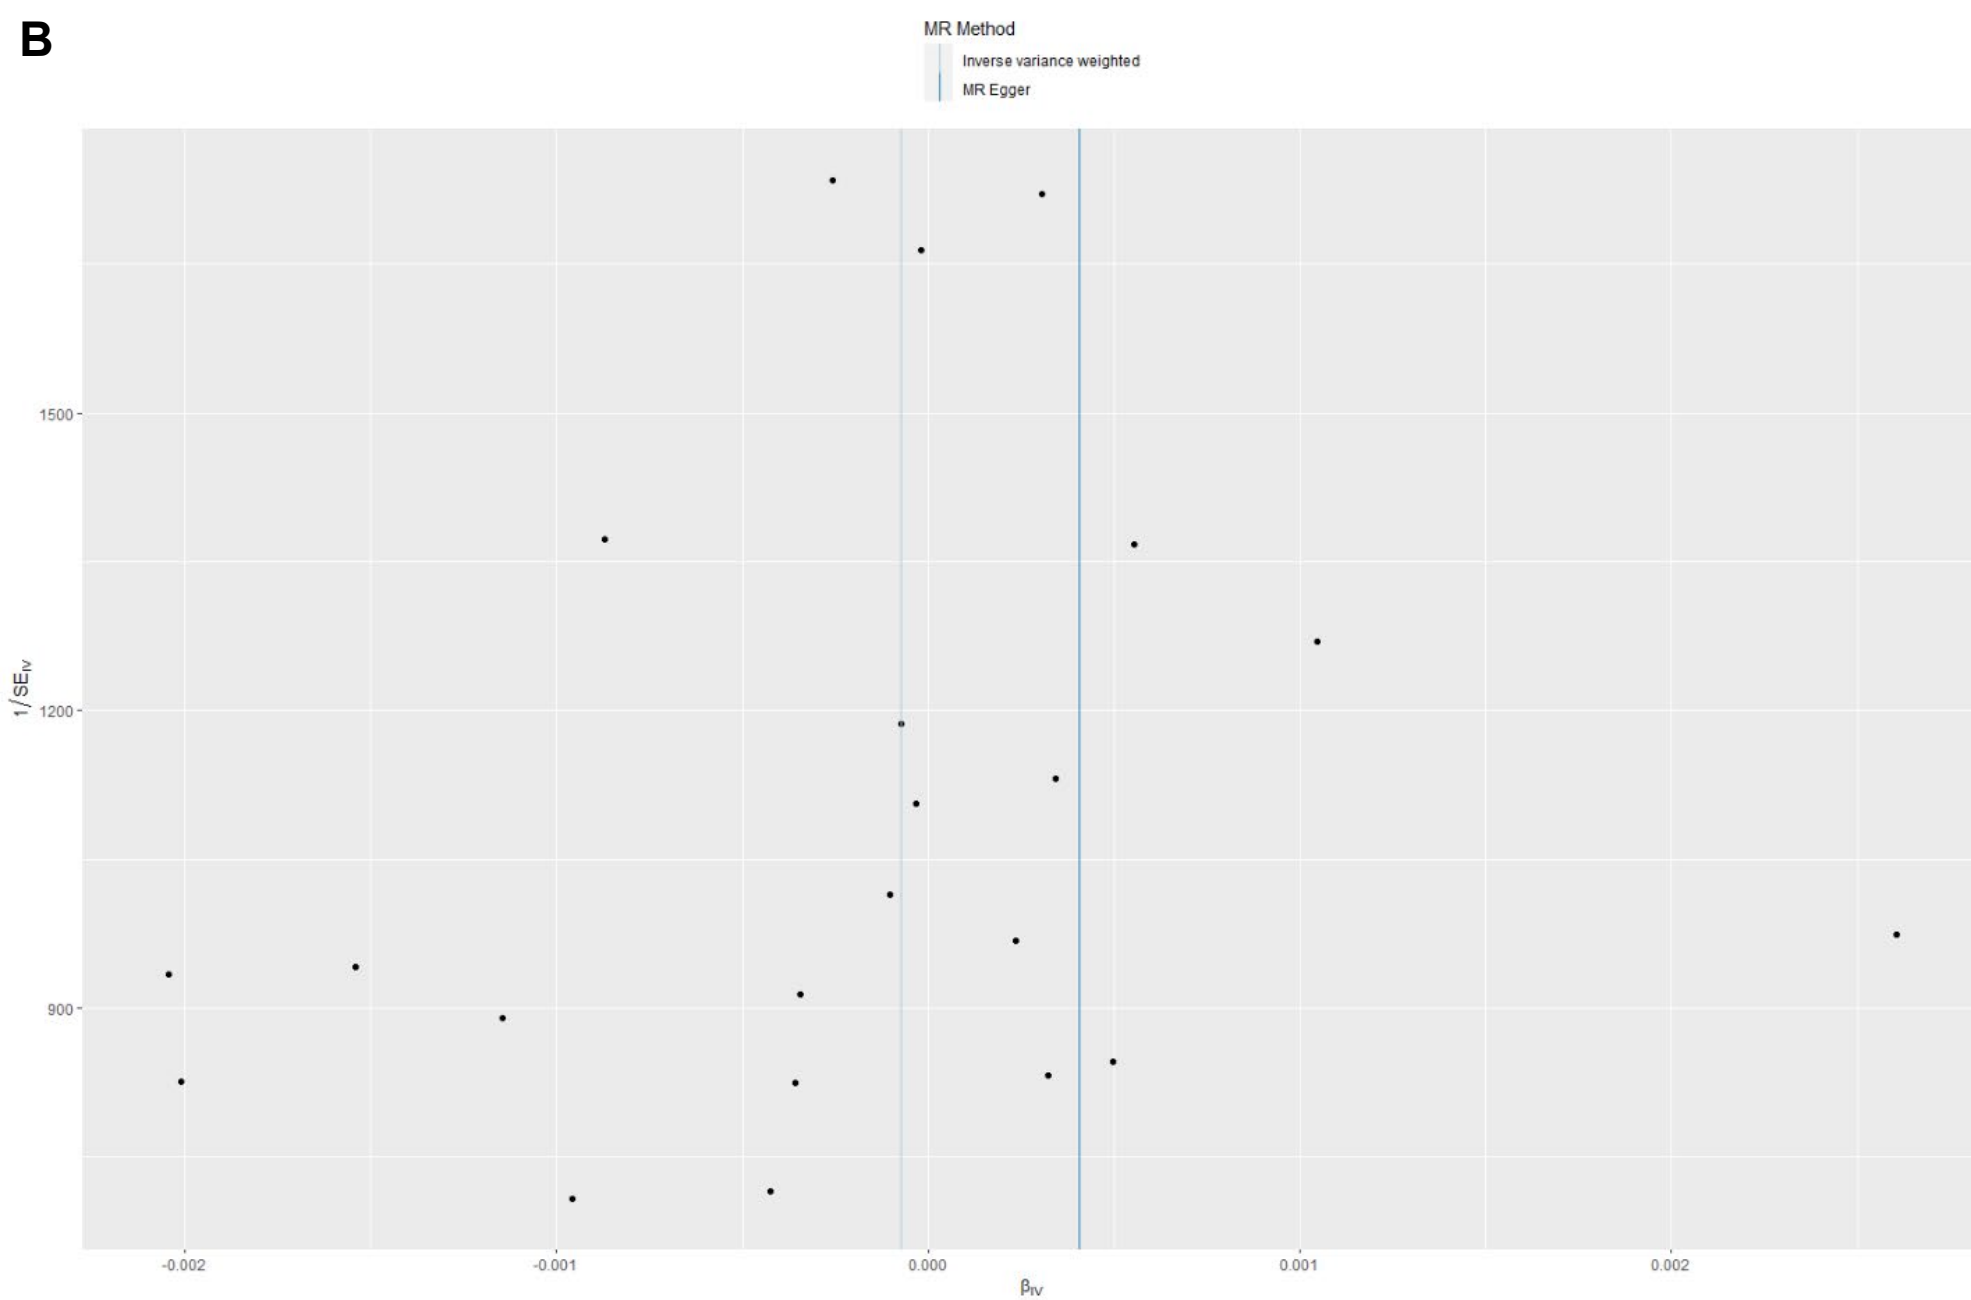

Supplementary Figure 11. Scatter plot (A) and funnel plot (B) of the causal effect of endometriosis on oropharyngeal cancer.

**A**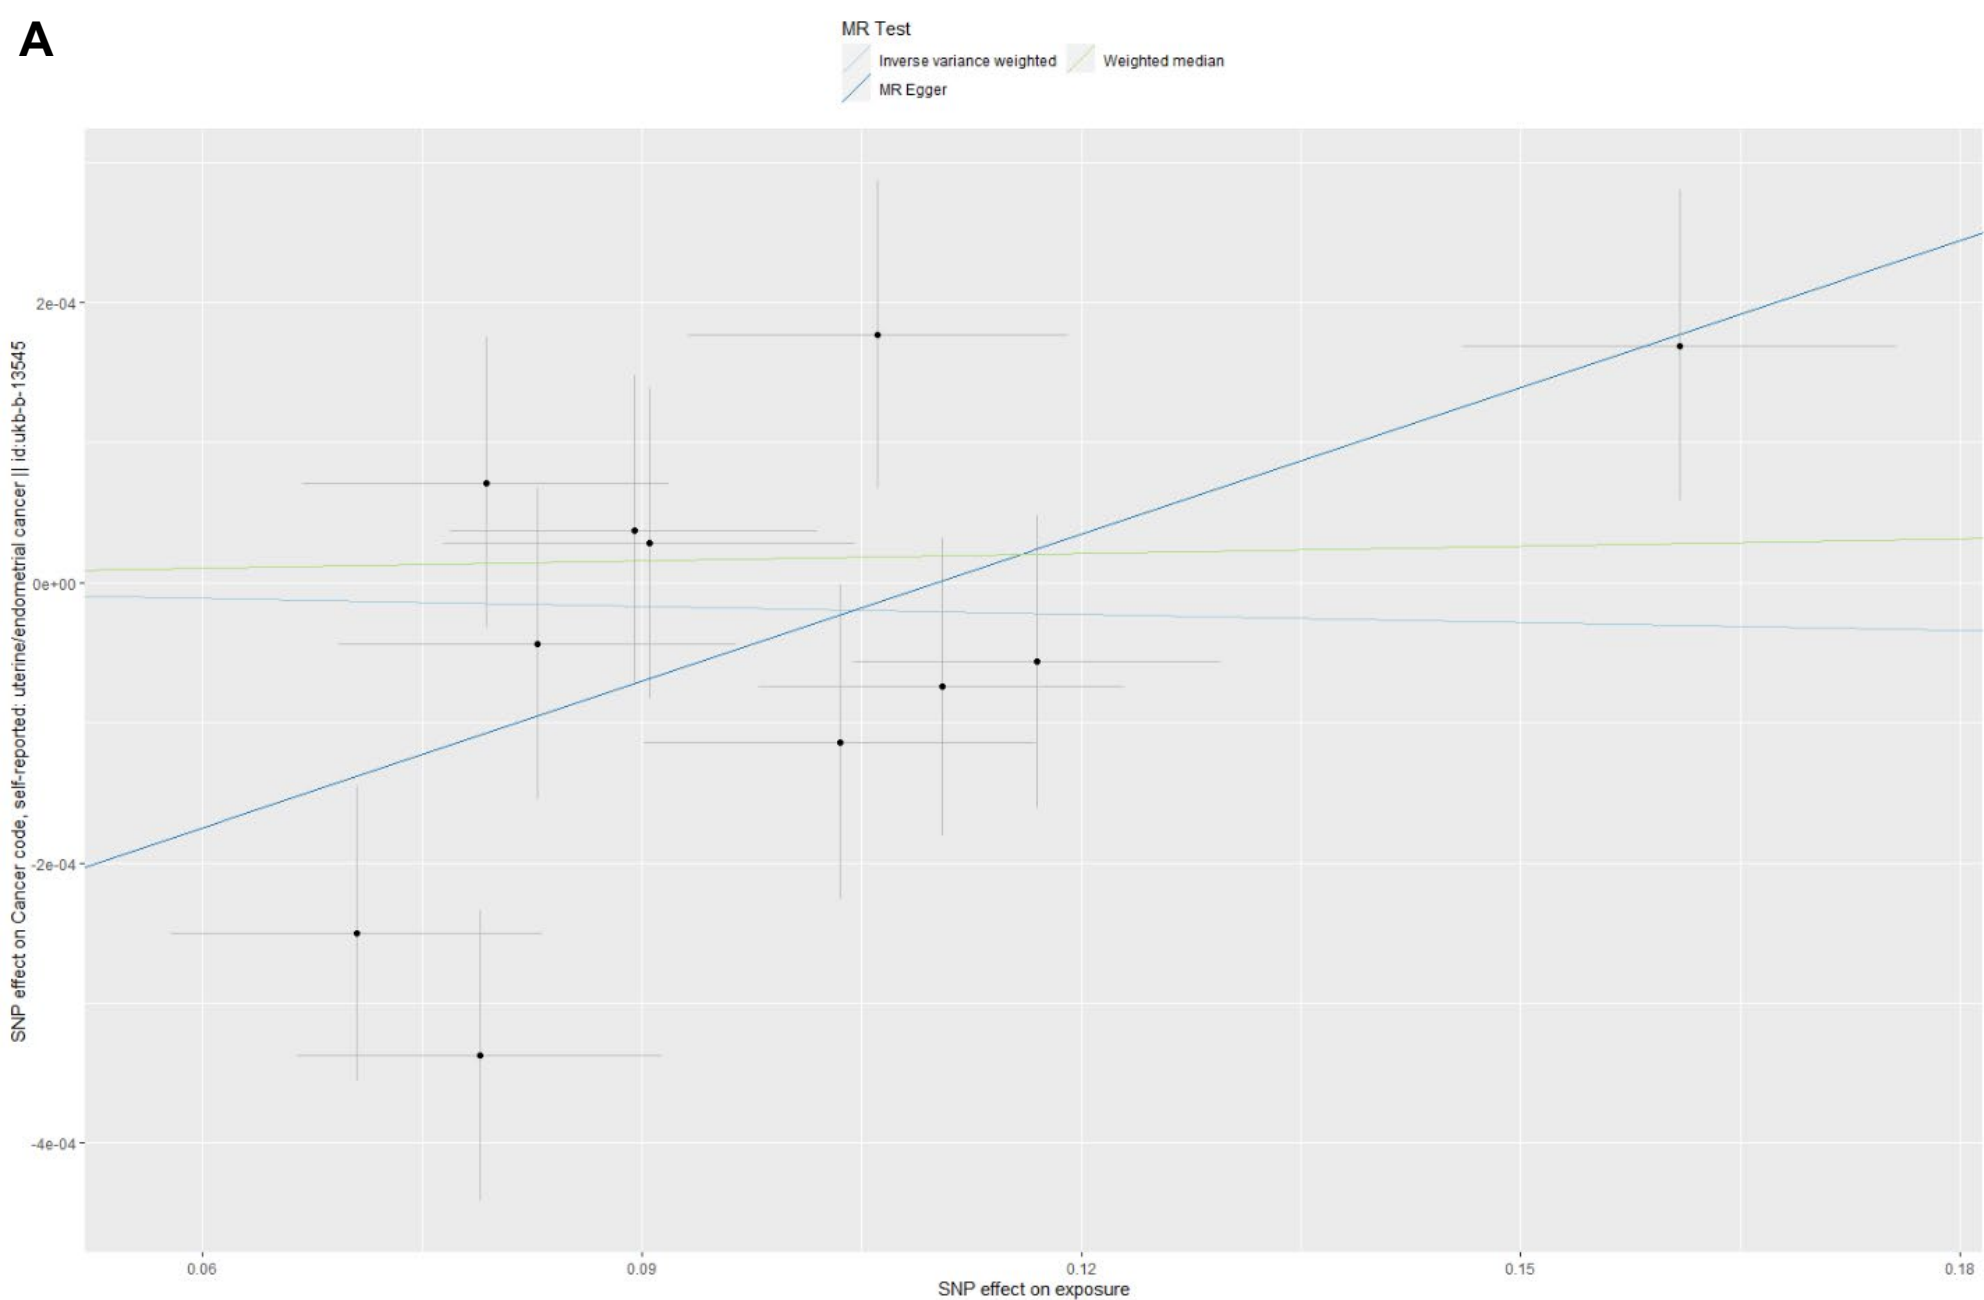

Supplementary Figure 12. Scatter plot (A) and funnel plot (B) of the causal effect of endometriosis on endometrial cancer.

**B**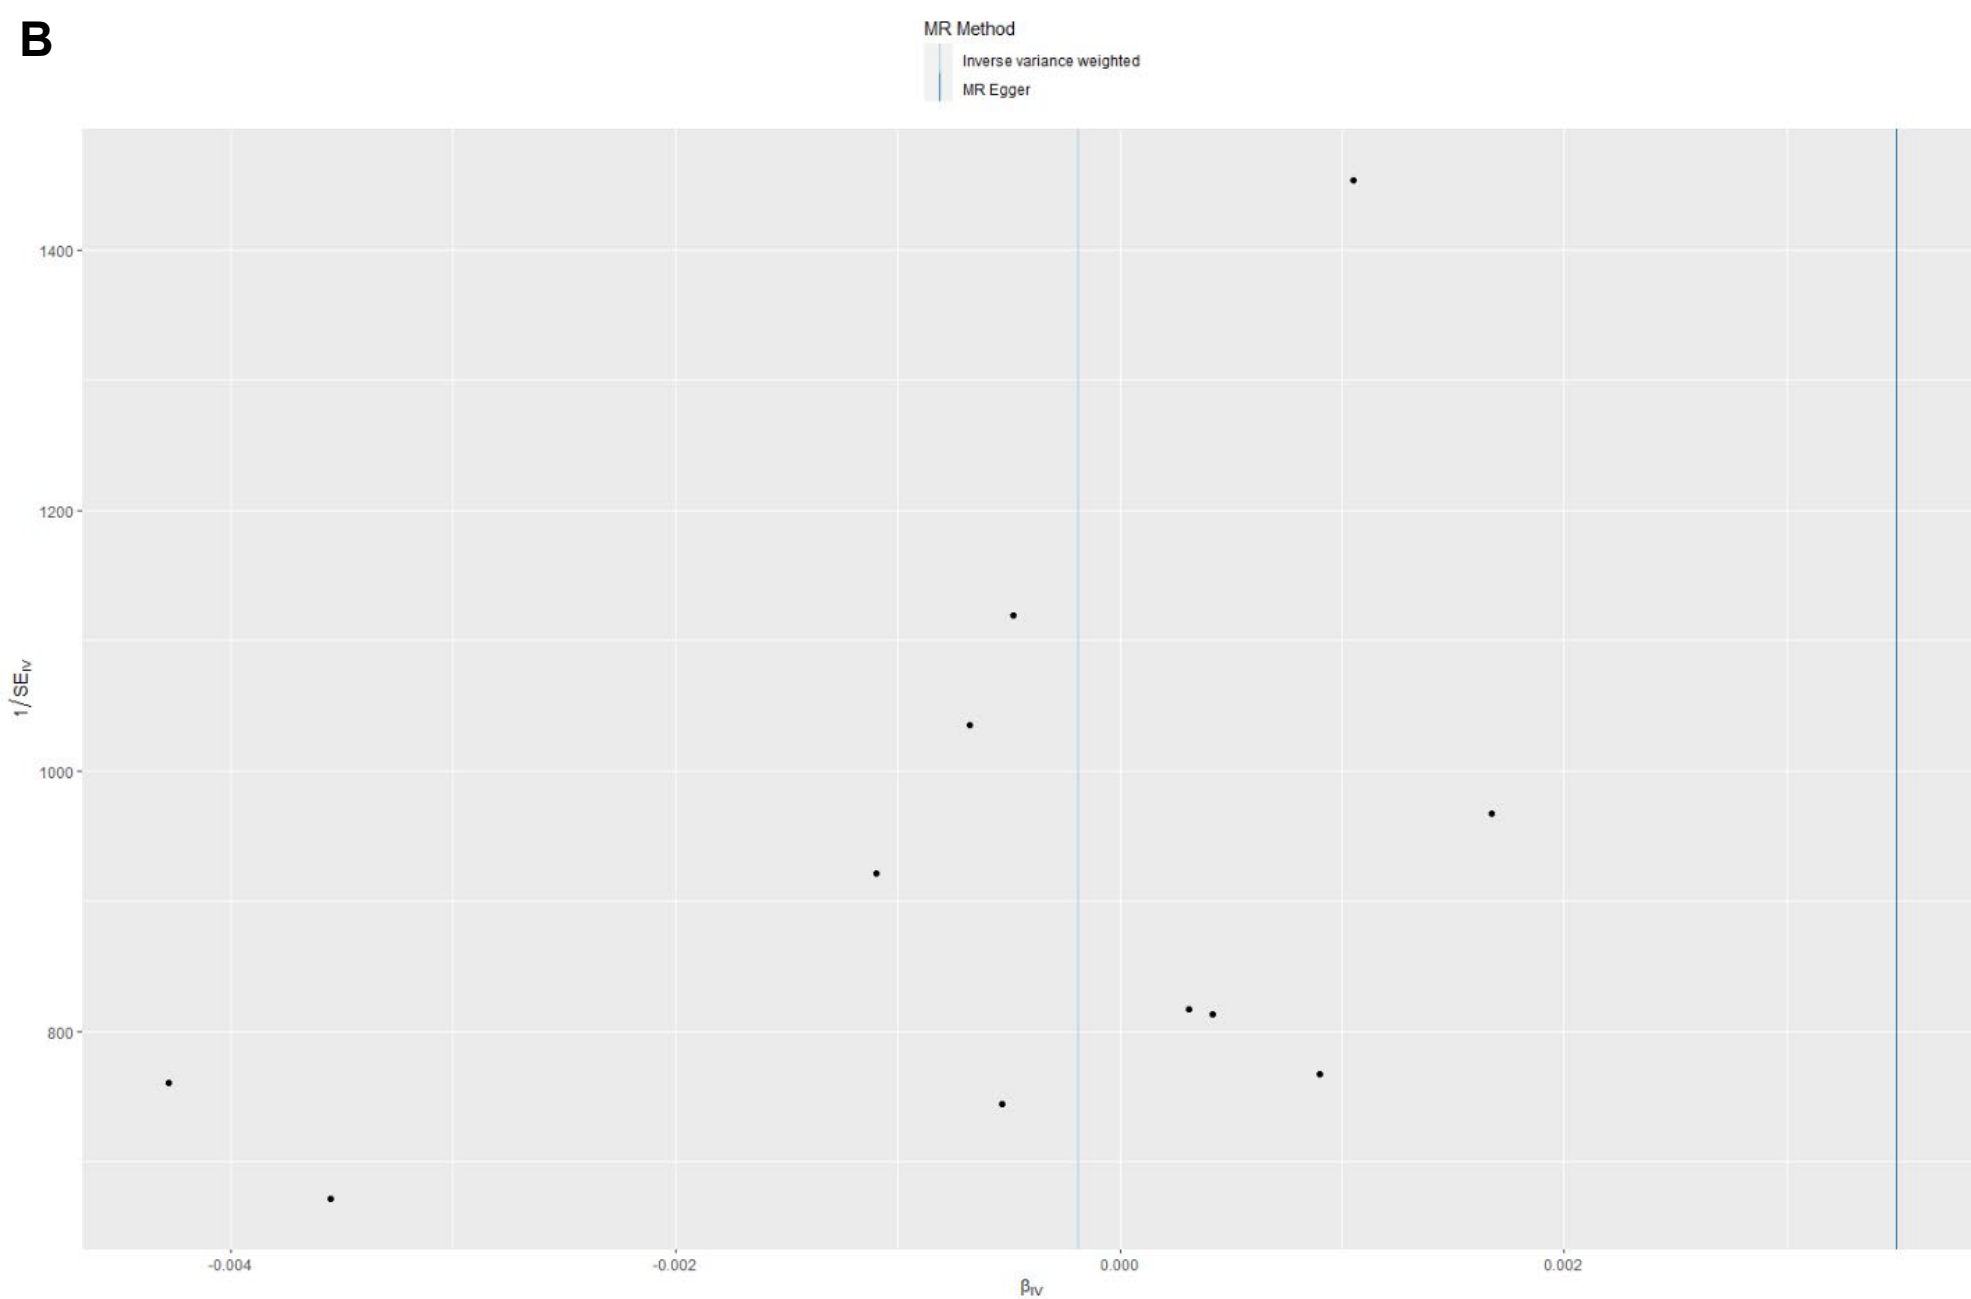

Supplementary Figure 12. Scatter plot (A) and funnel plot (B) of the causal effect of endometriosis on endometrial cancer.



**A**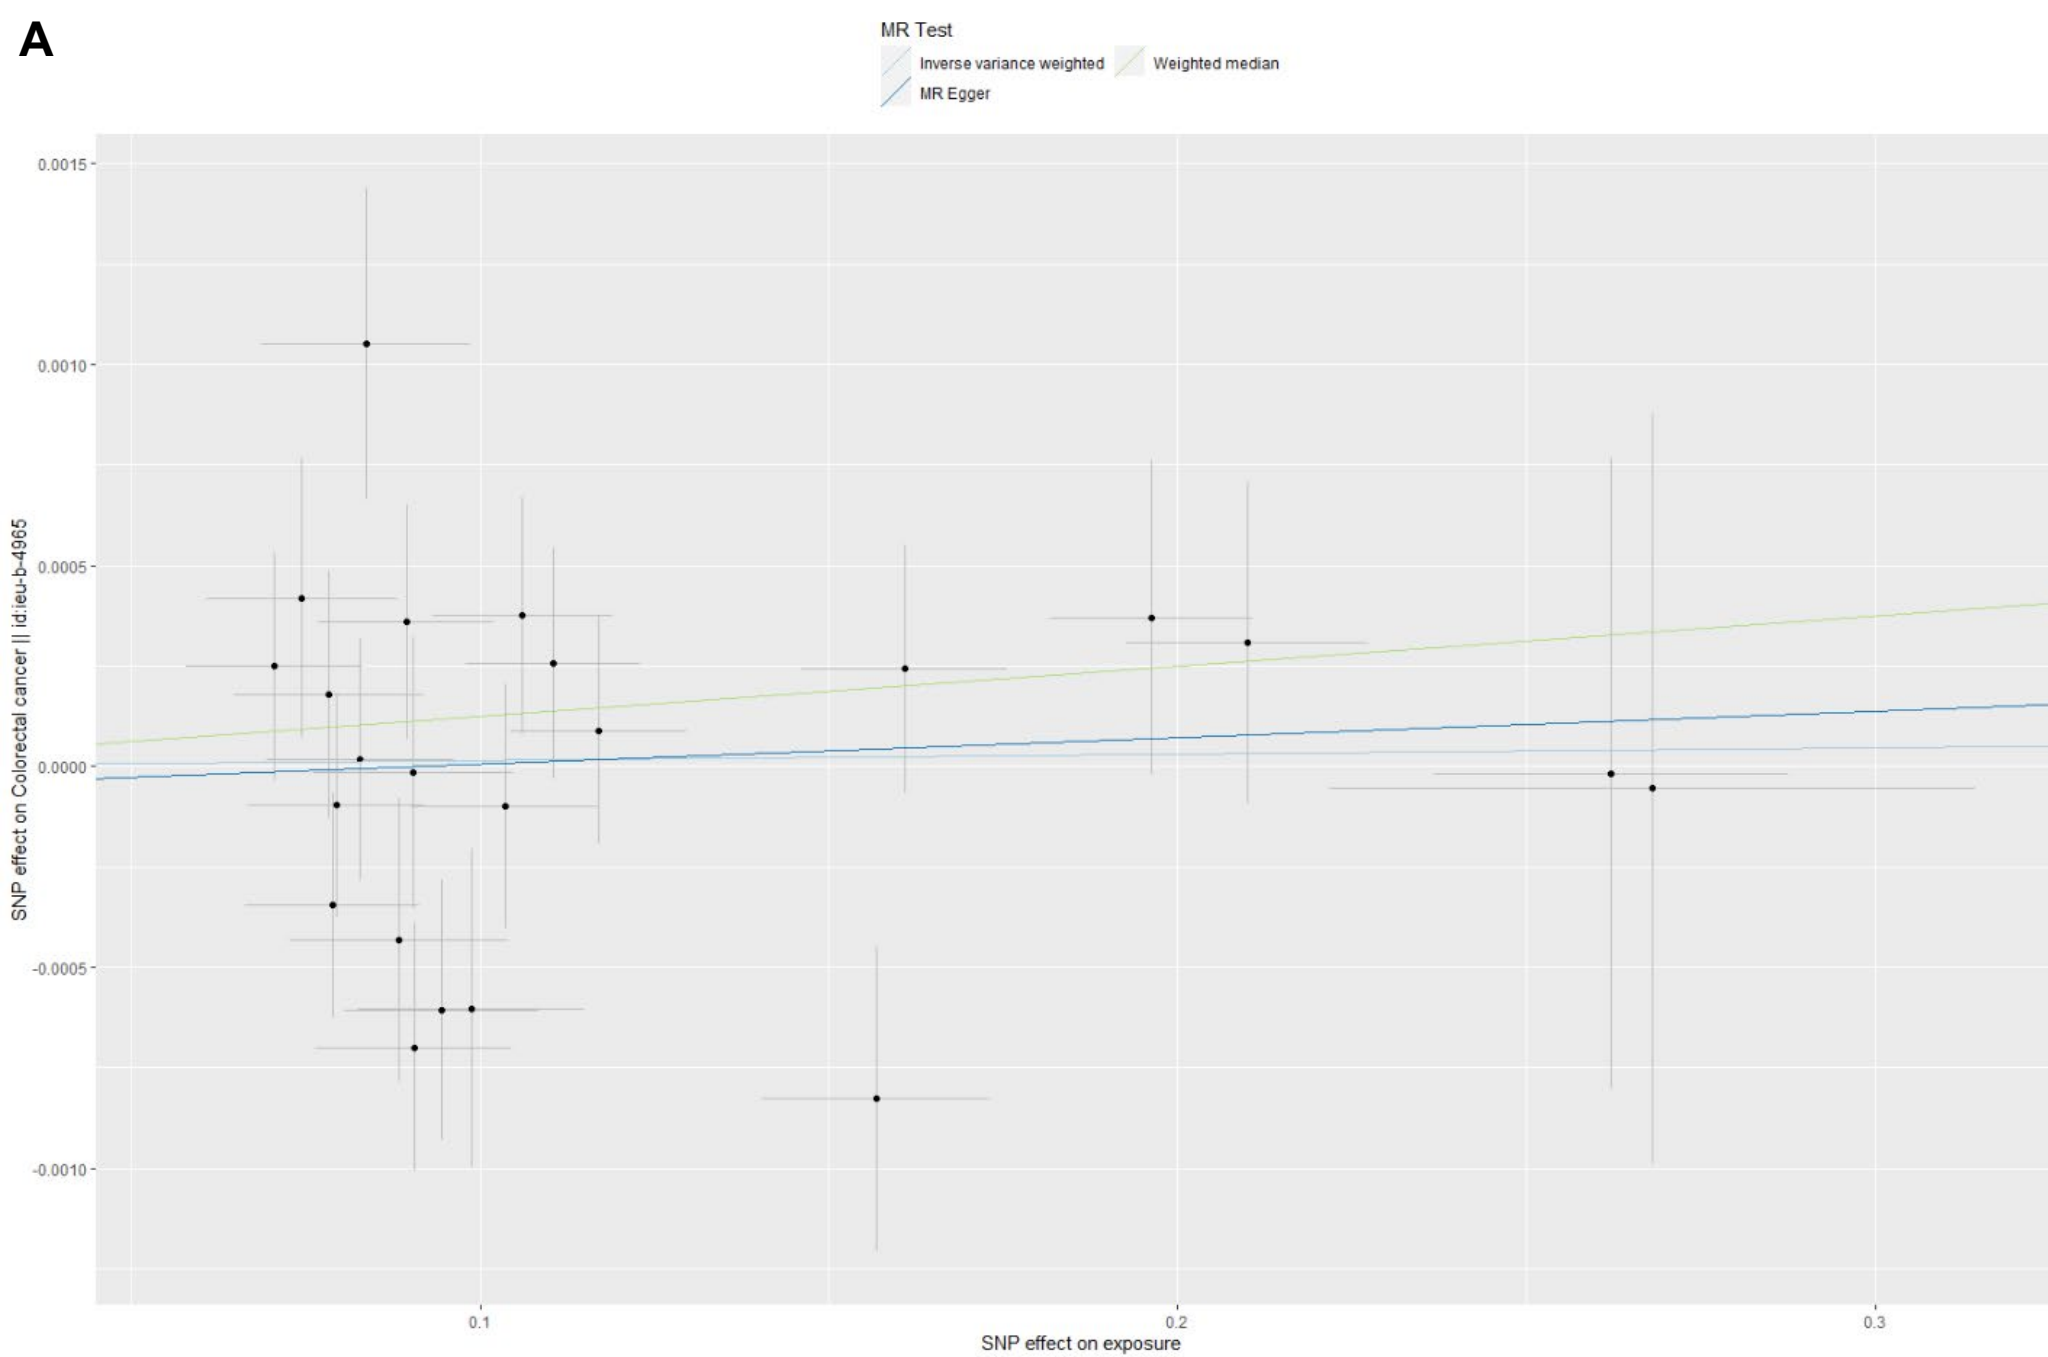

Supplementary Figure 13. Scatter plot (A) and funnel plot (B) of the causal effect of endometriosis on colorectal cancer.

**B**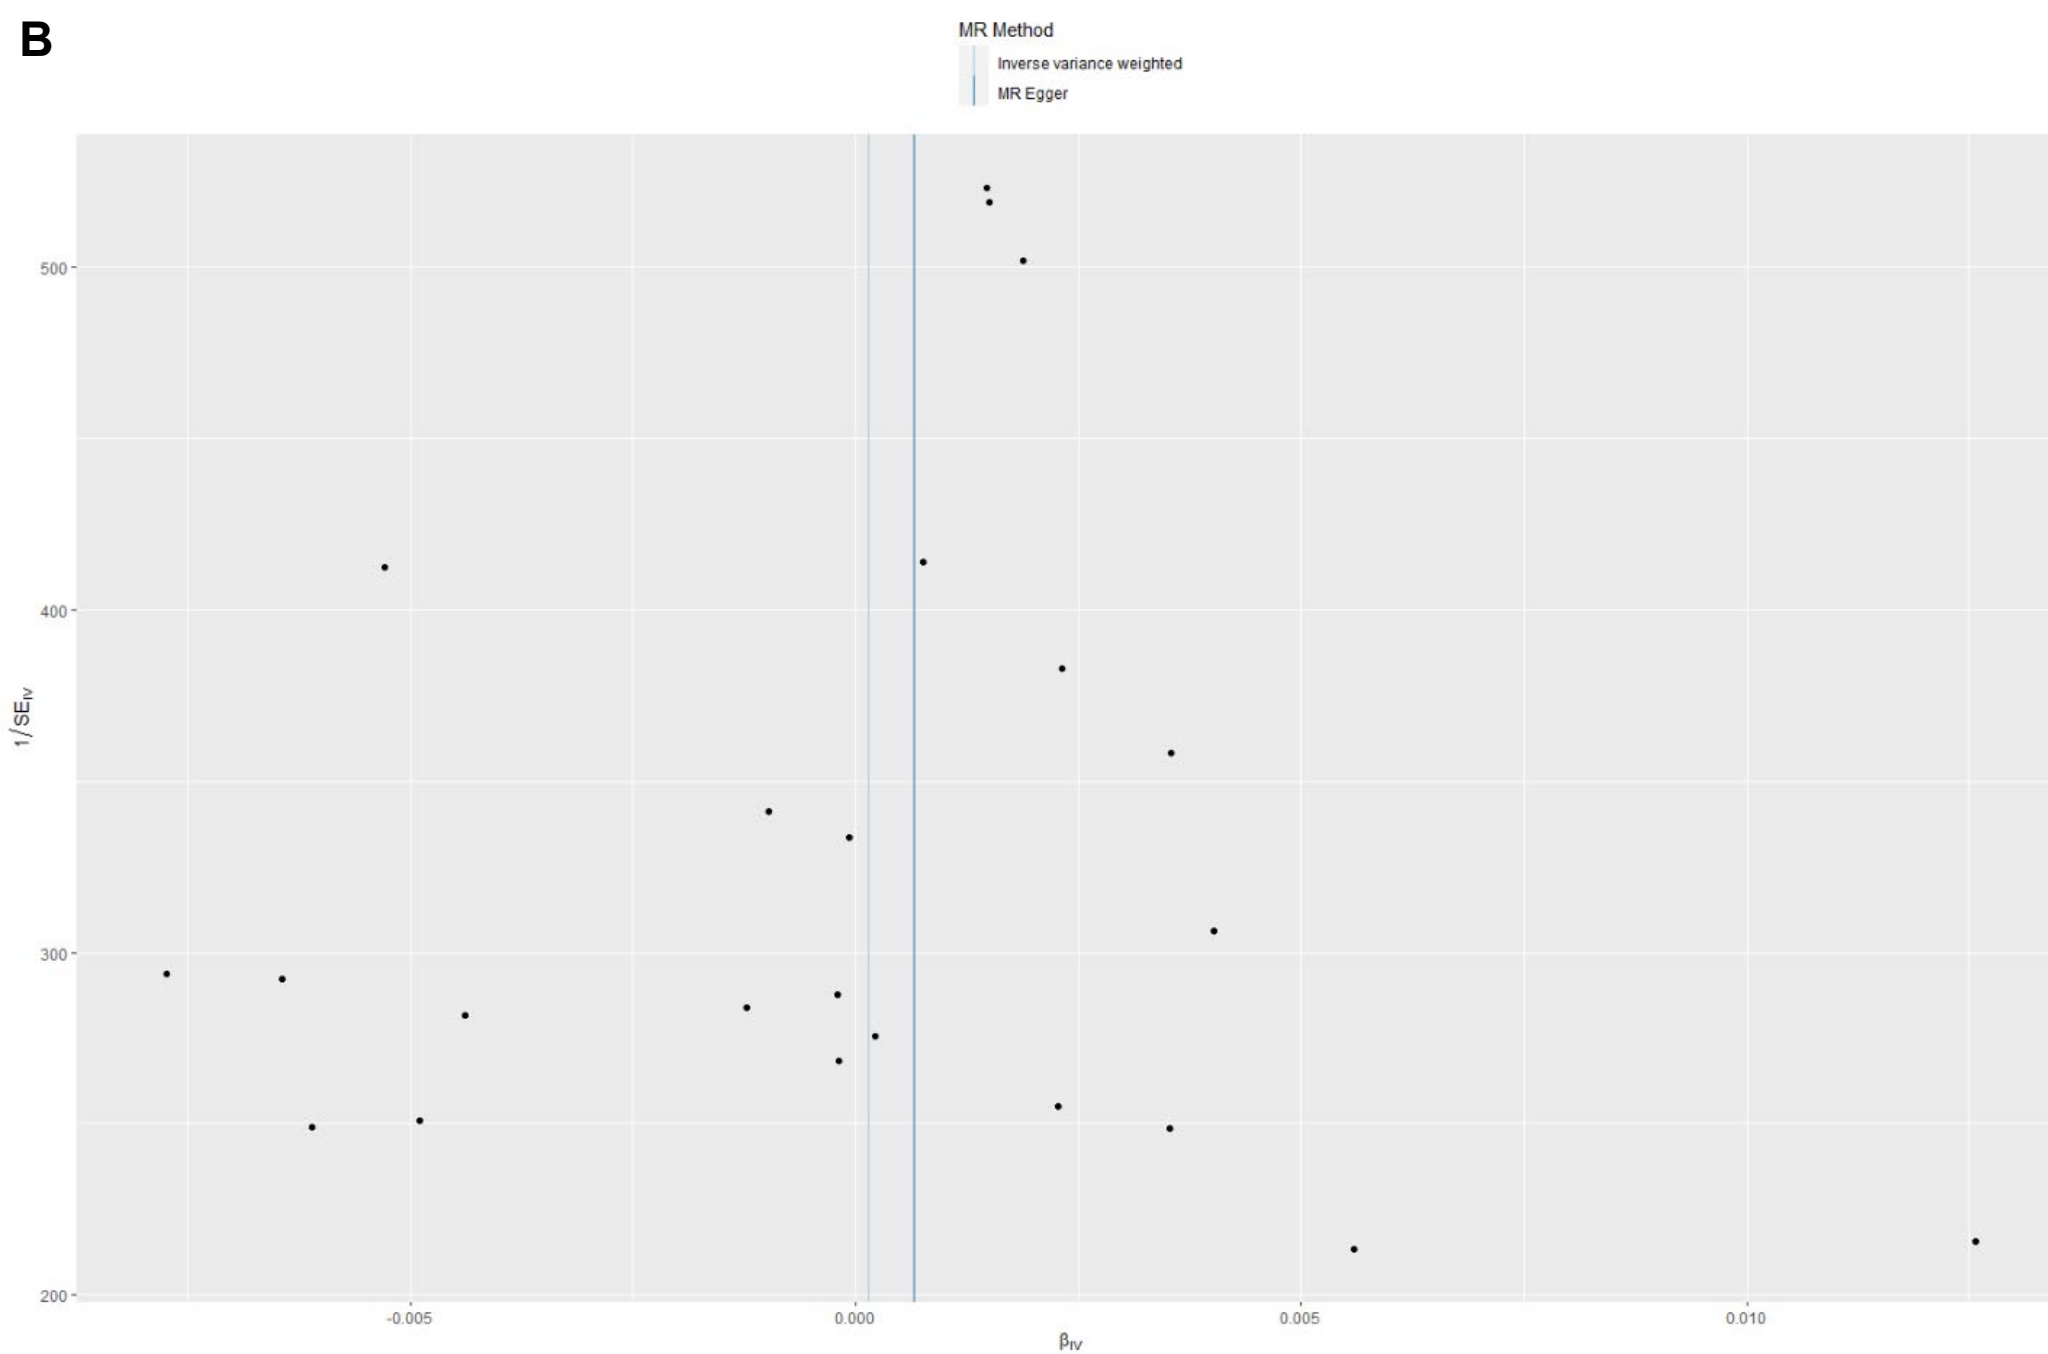

Supplementary Figure 13. Scatter plot (A) and funnel plot (B) of the causal effect of endometriosis on colorectal cancer.

**A**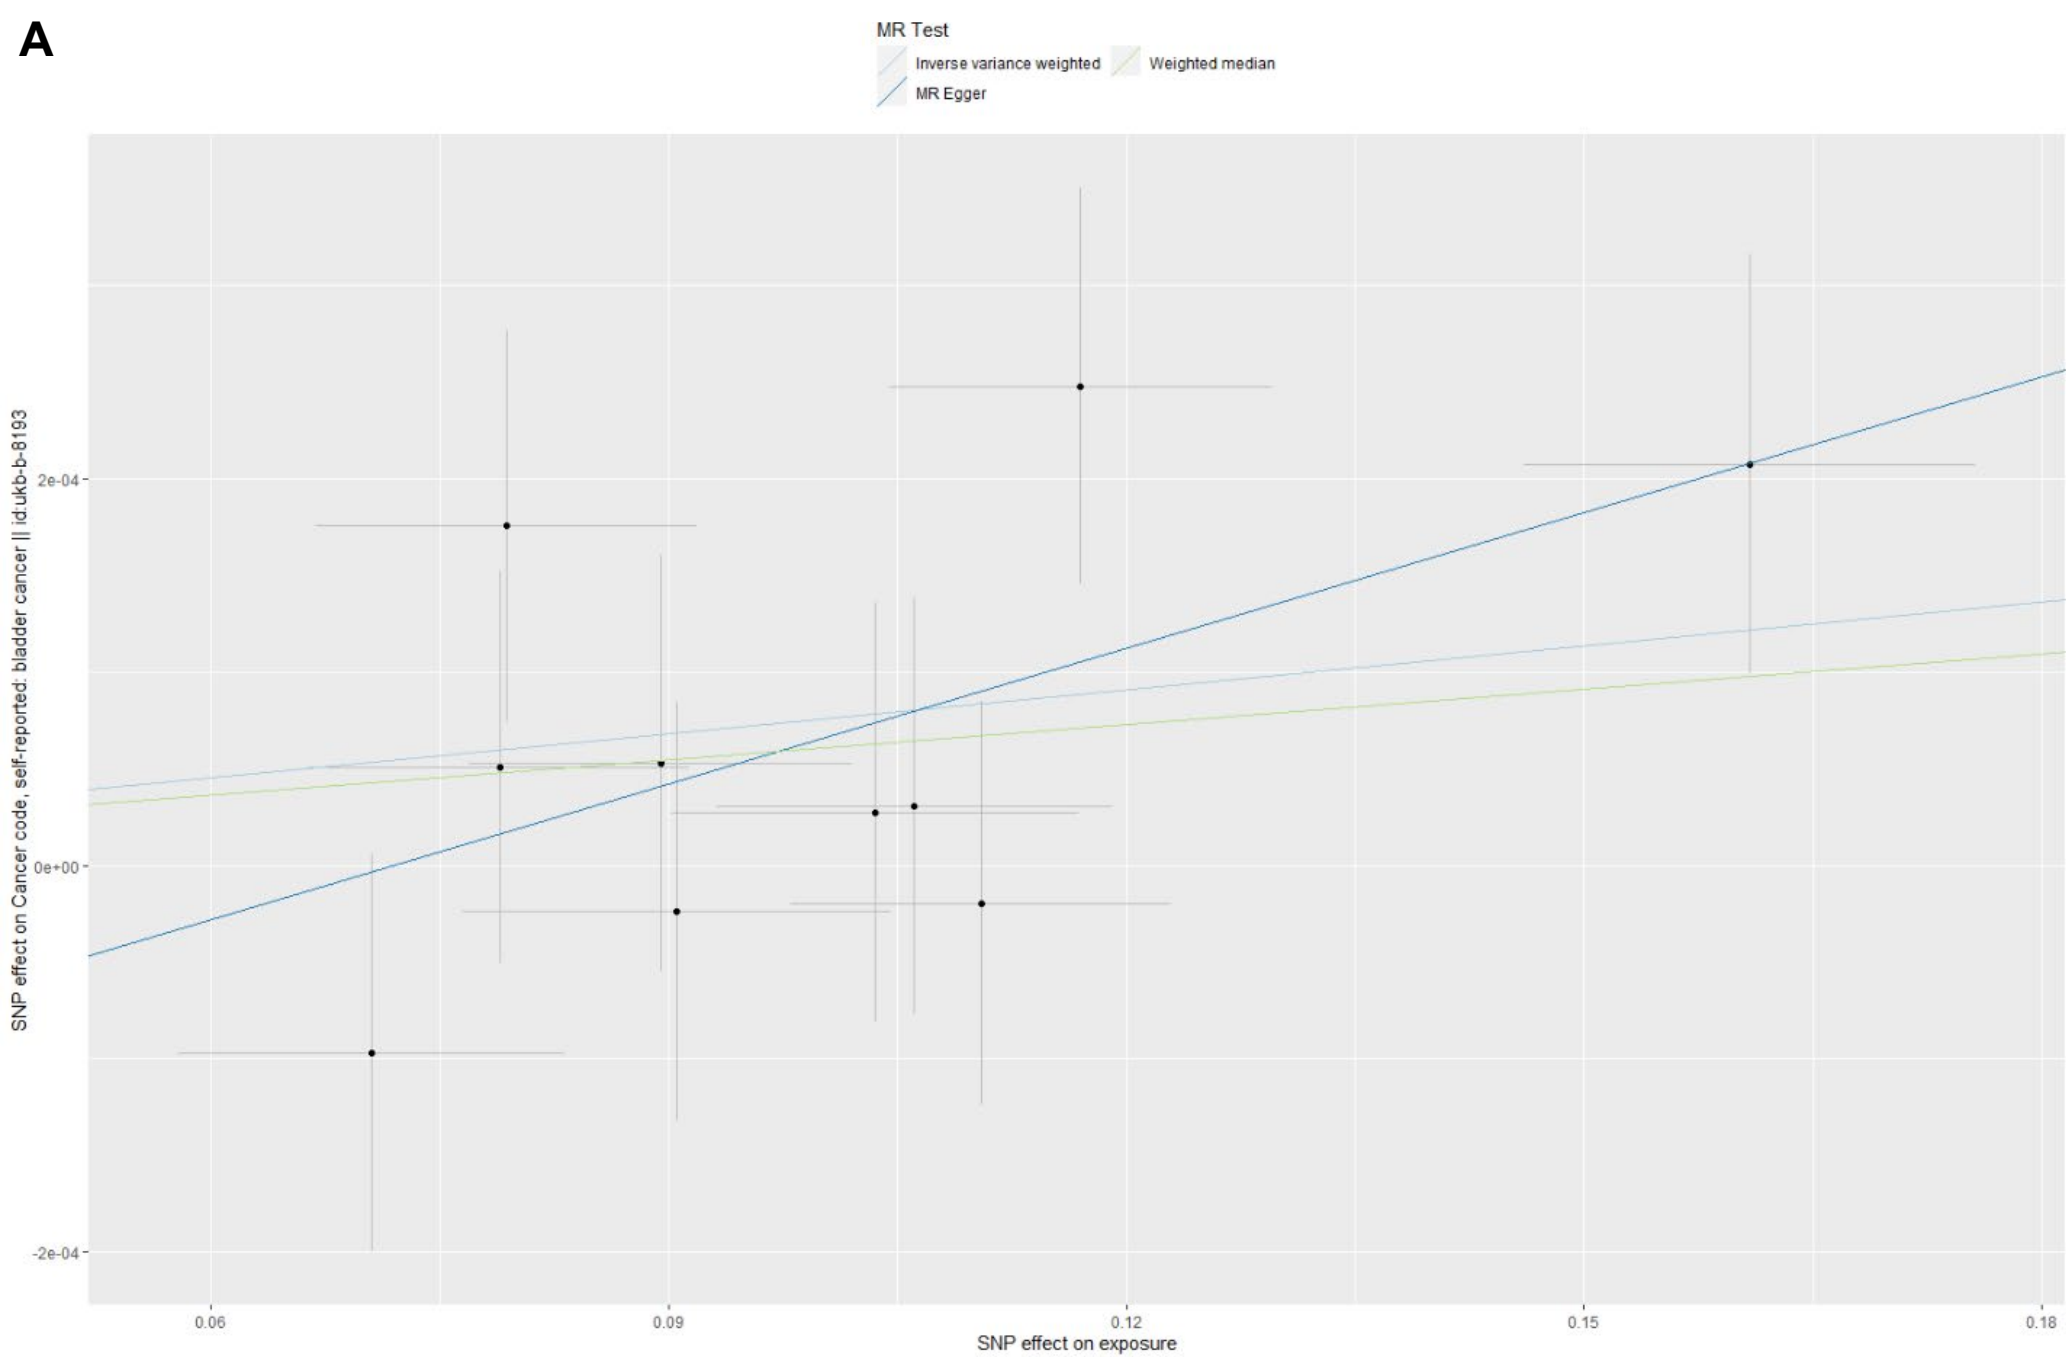

Supplementary Figure 14. Scatter plot (A) and funnel plot (B) of the causal effect of endometriosis on bladder cancer.

**B**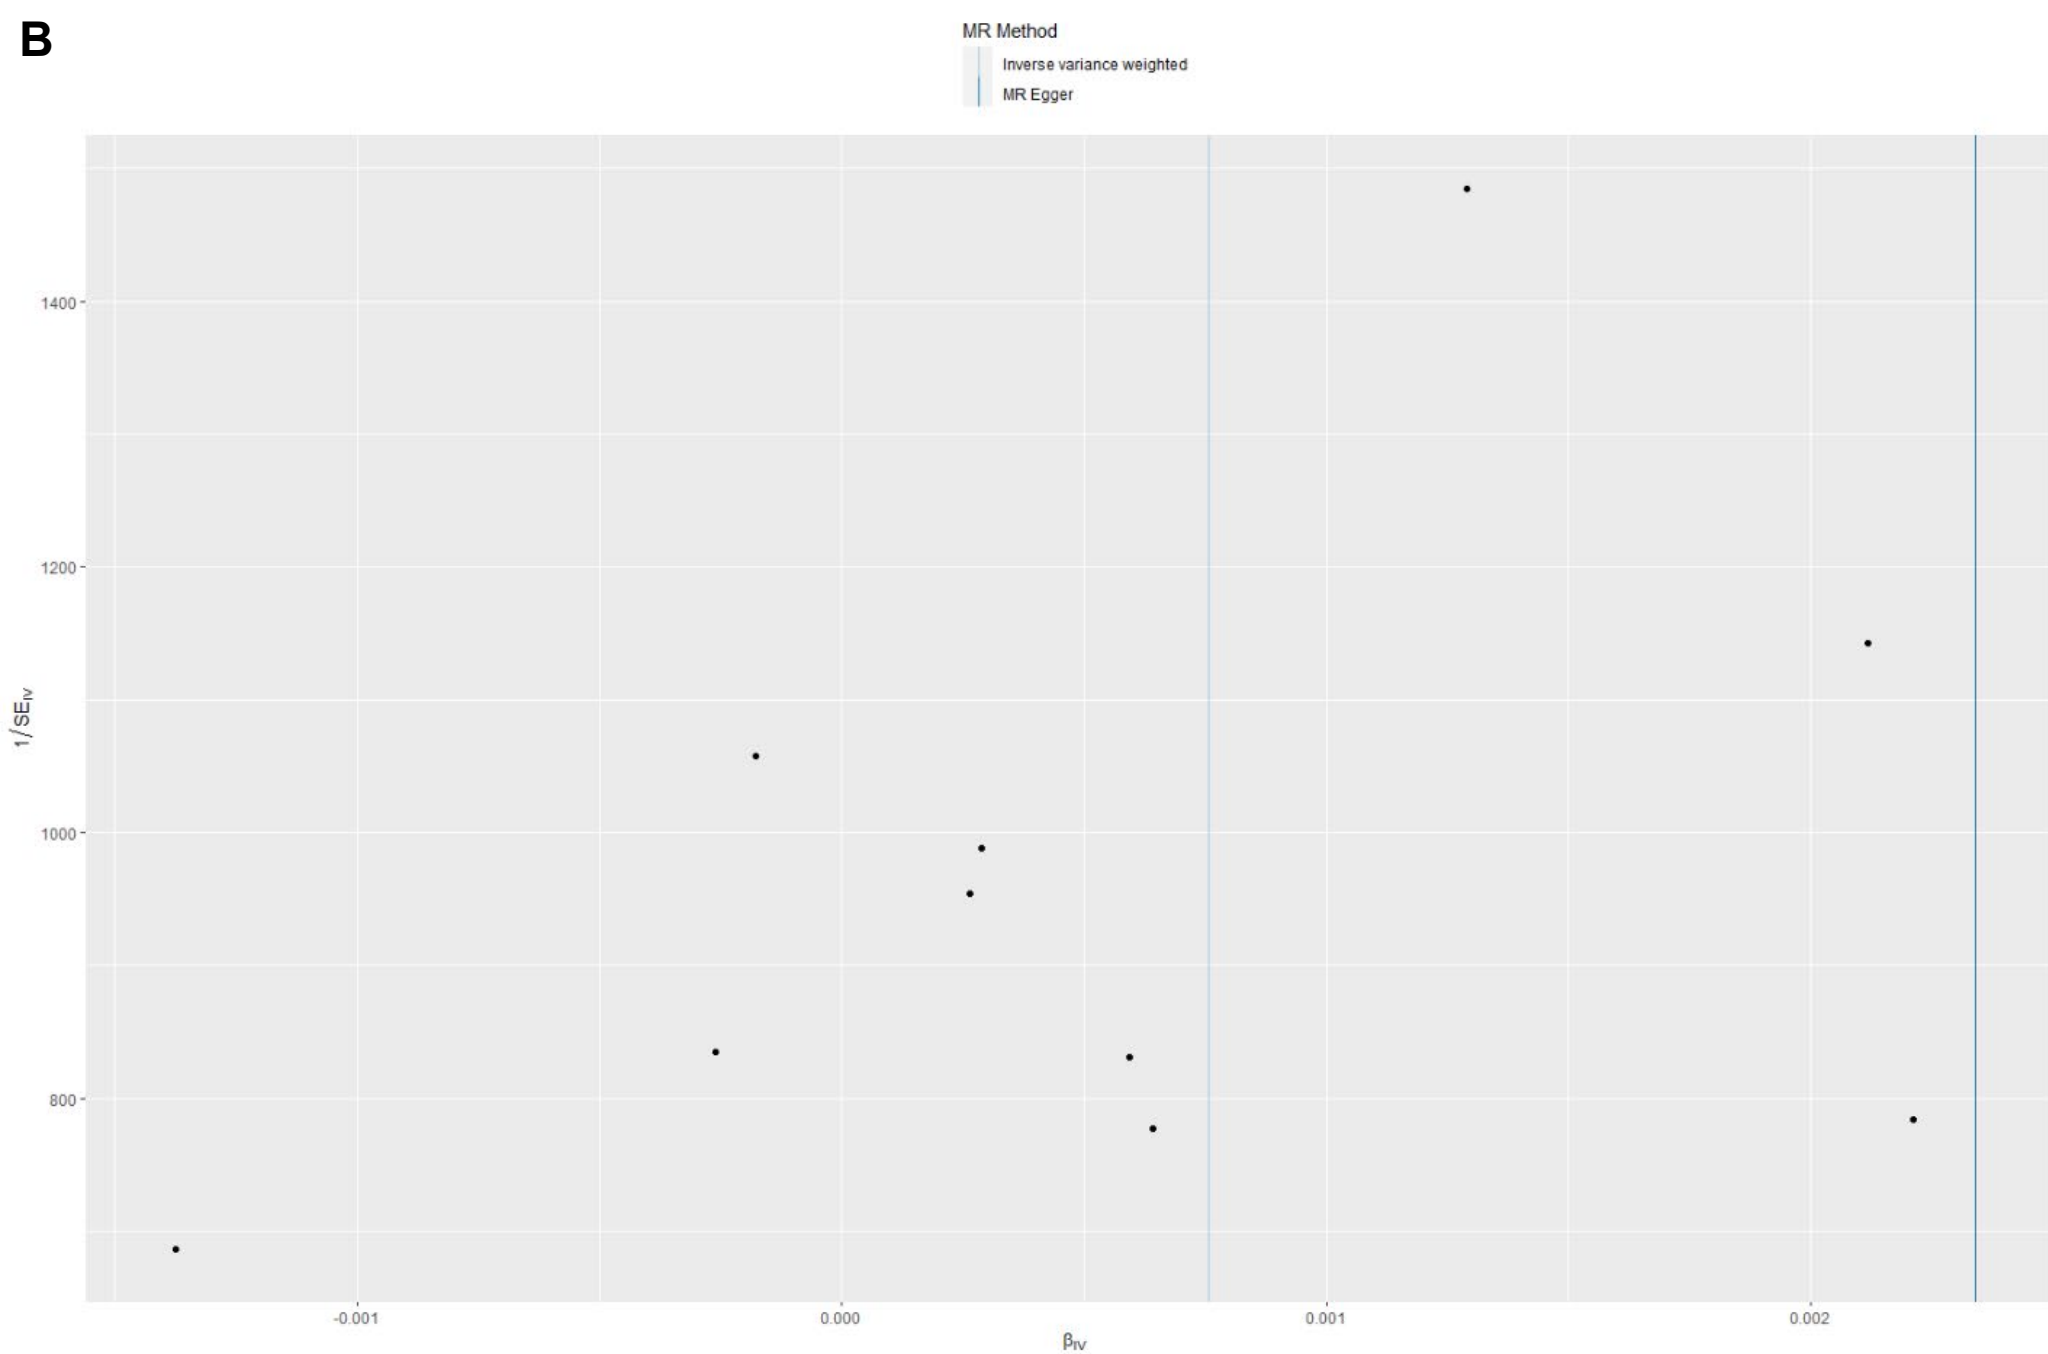

Supplementary Figure 14. Scatter plot (A) and funnel plot (B) of the causal effect of endometriosis on bladder cancer.

**A**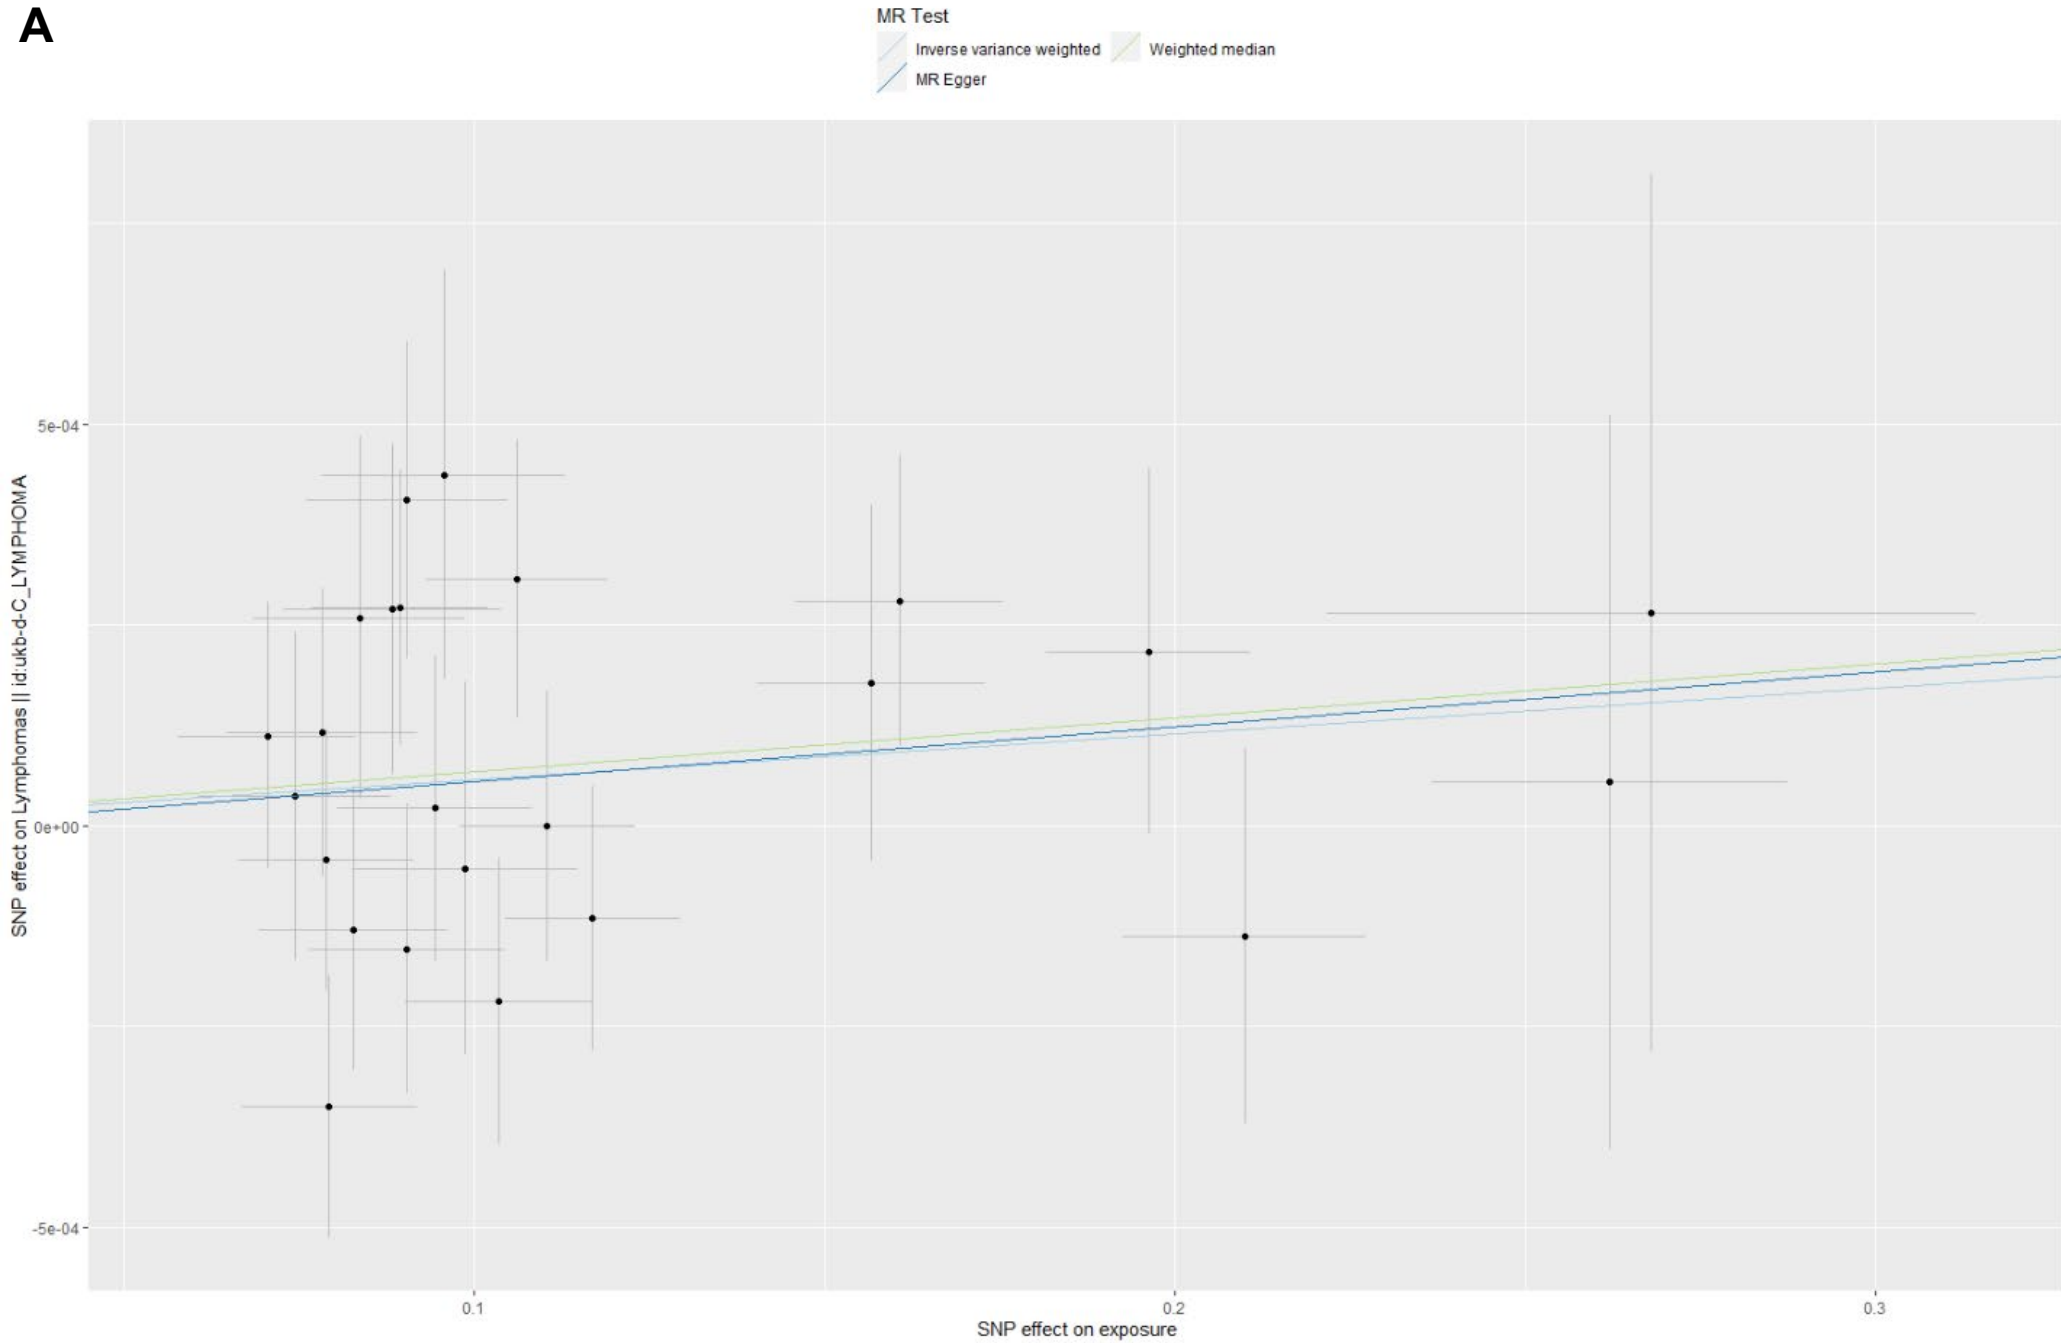

Supplementary Figure 15. Scatter plot (A) and funnel plot (B) of the causal effect of endometriosis on lymphoma.

**B**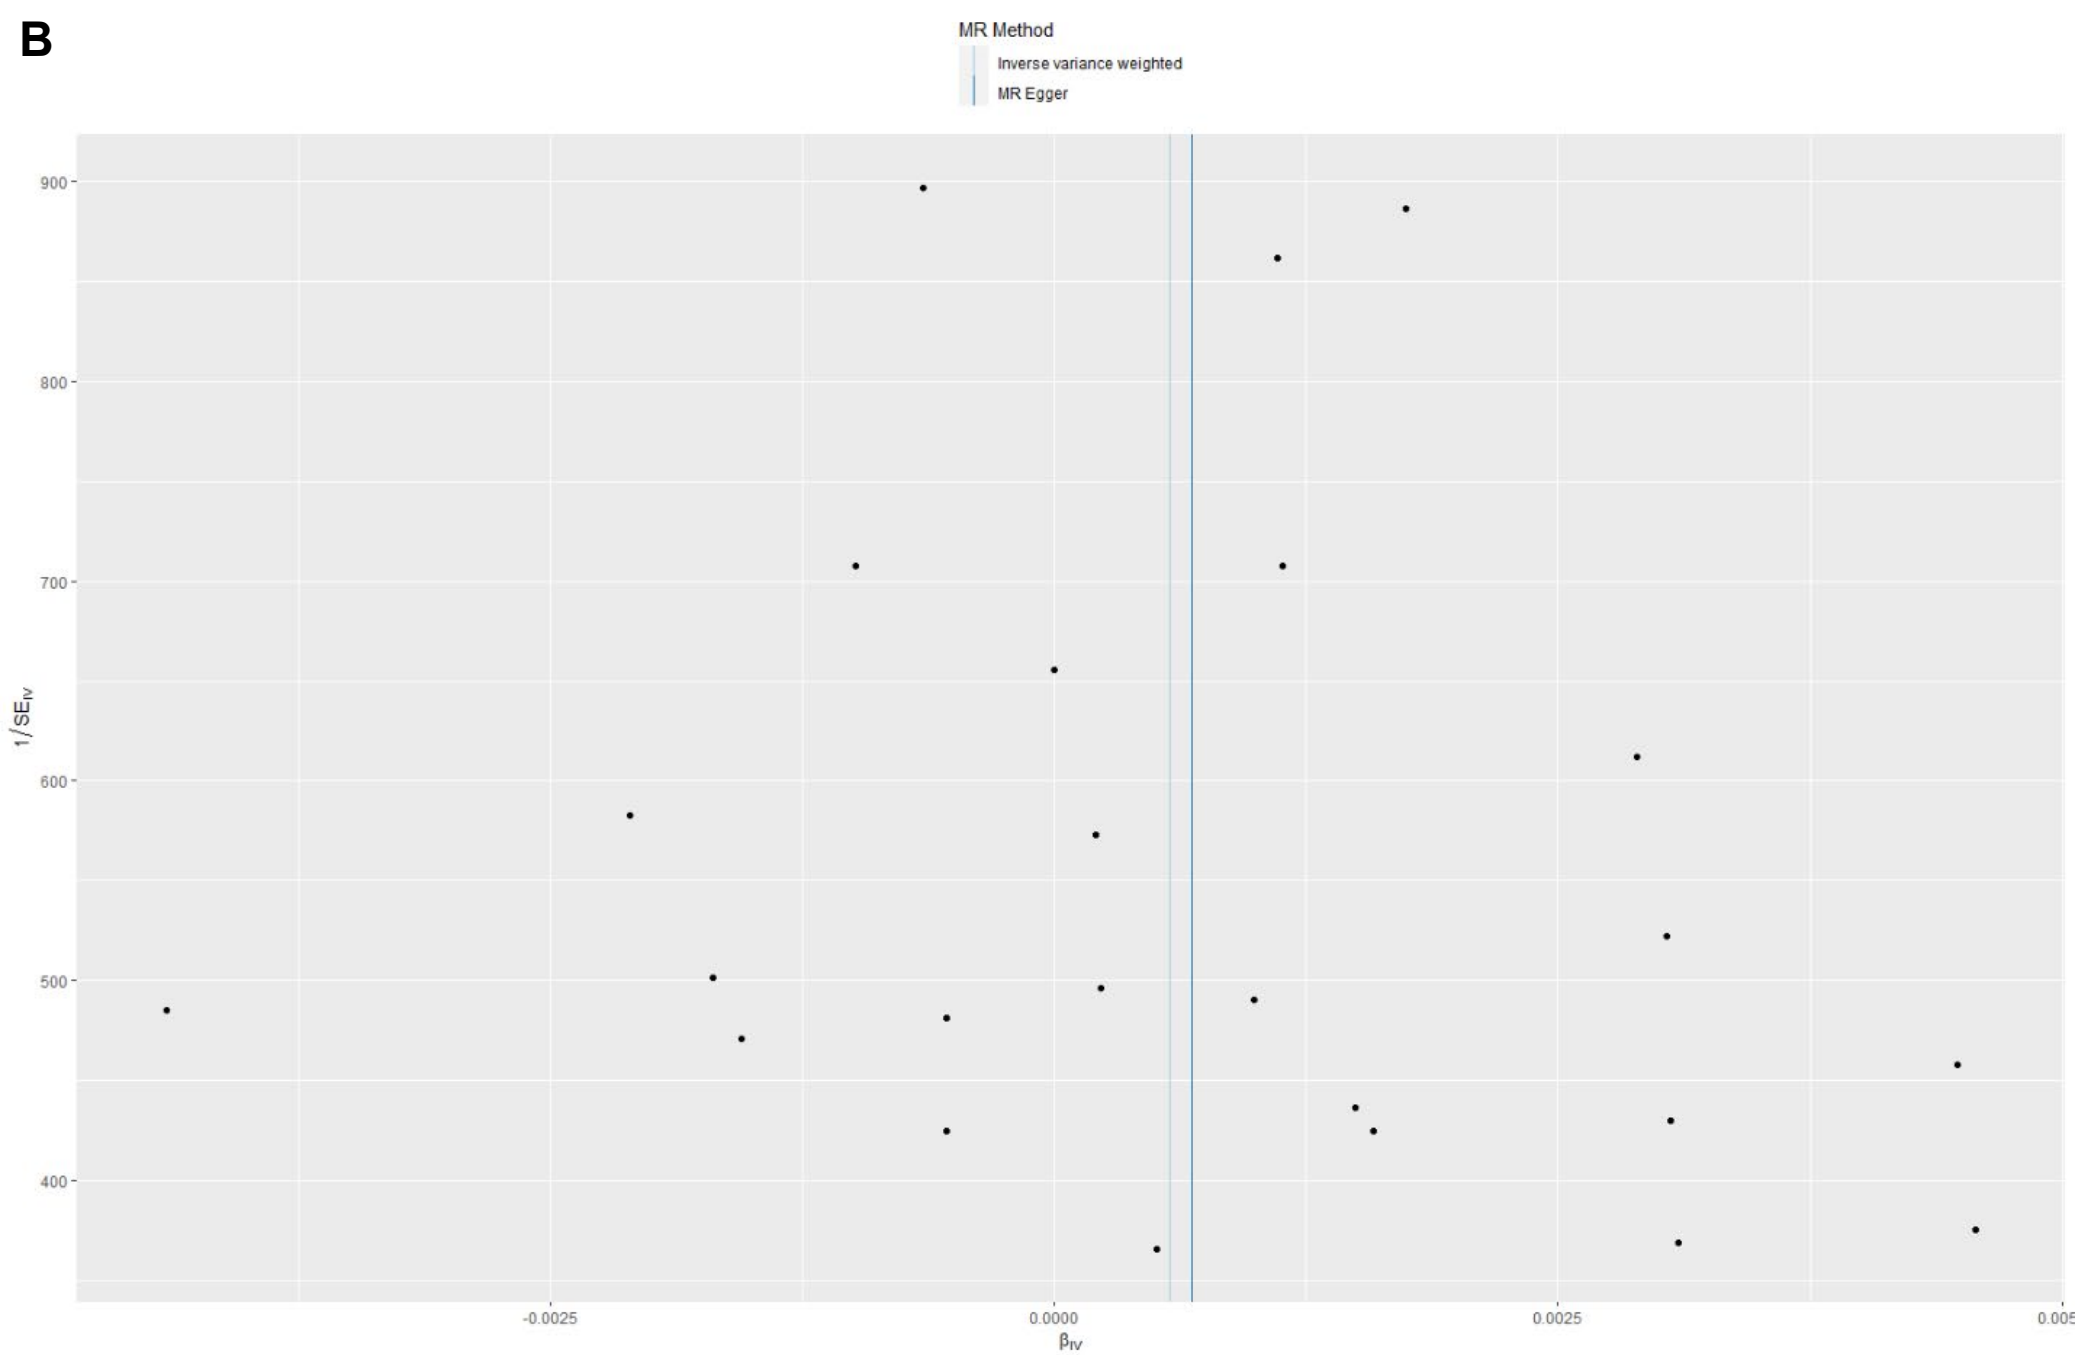

Supplementary Figure 15. Scatter plot (A) and funnel plot (B) of the causal effect of endometriosis on lymphoma.

**A**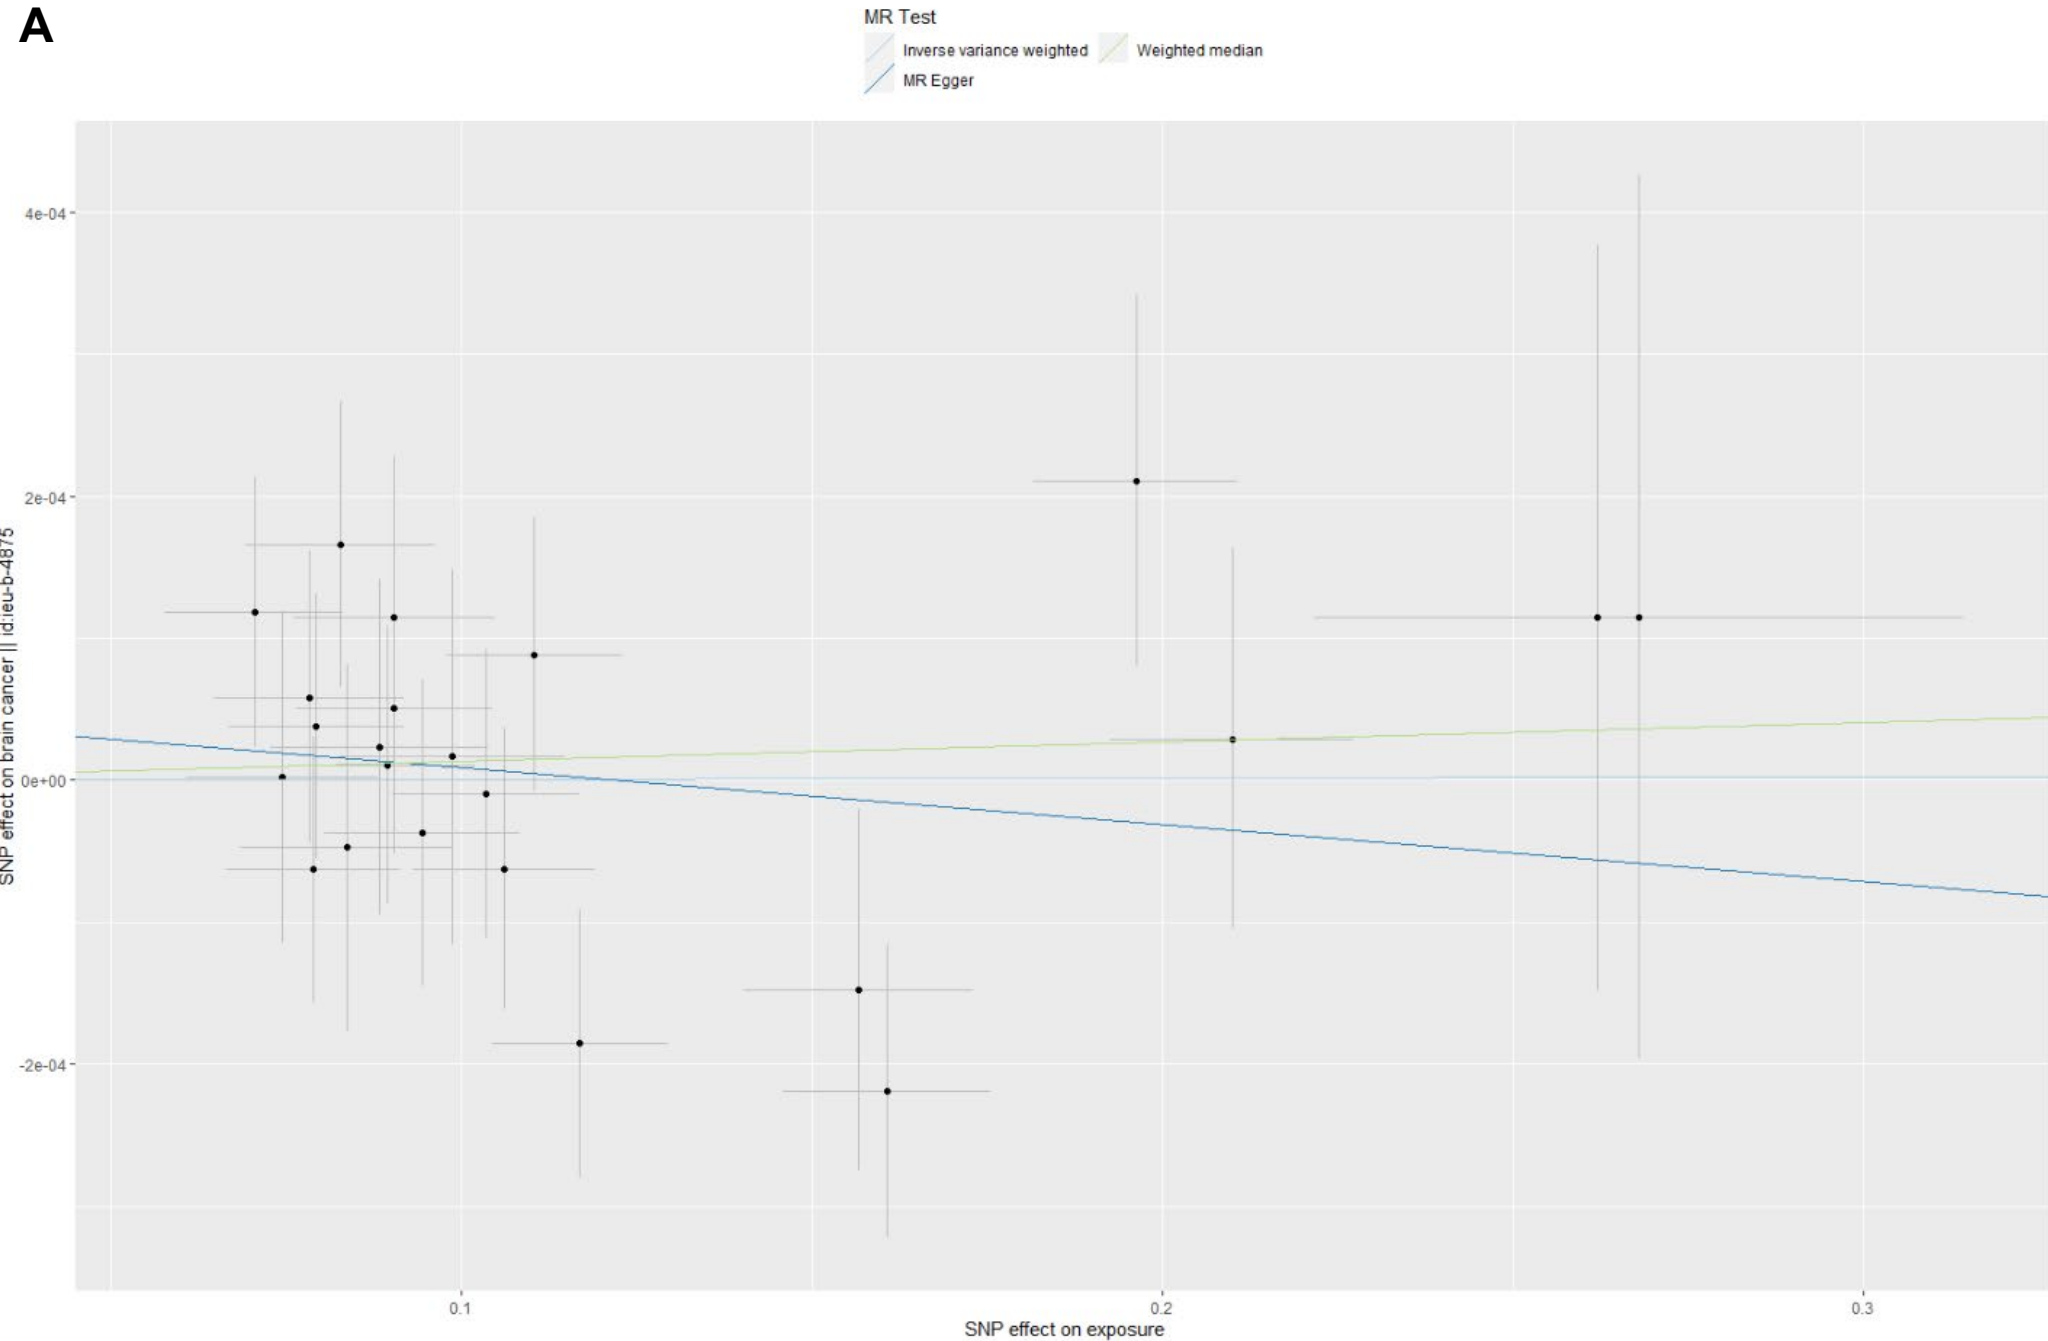

Supplementary Figure 16. Scatter plot (A) and funnel plot (B) of the causal effect of endometriosis on brain cancer.

**B**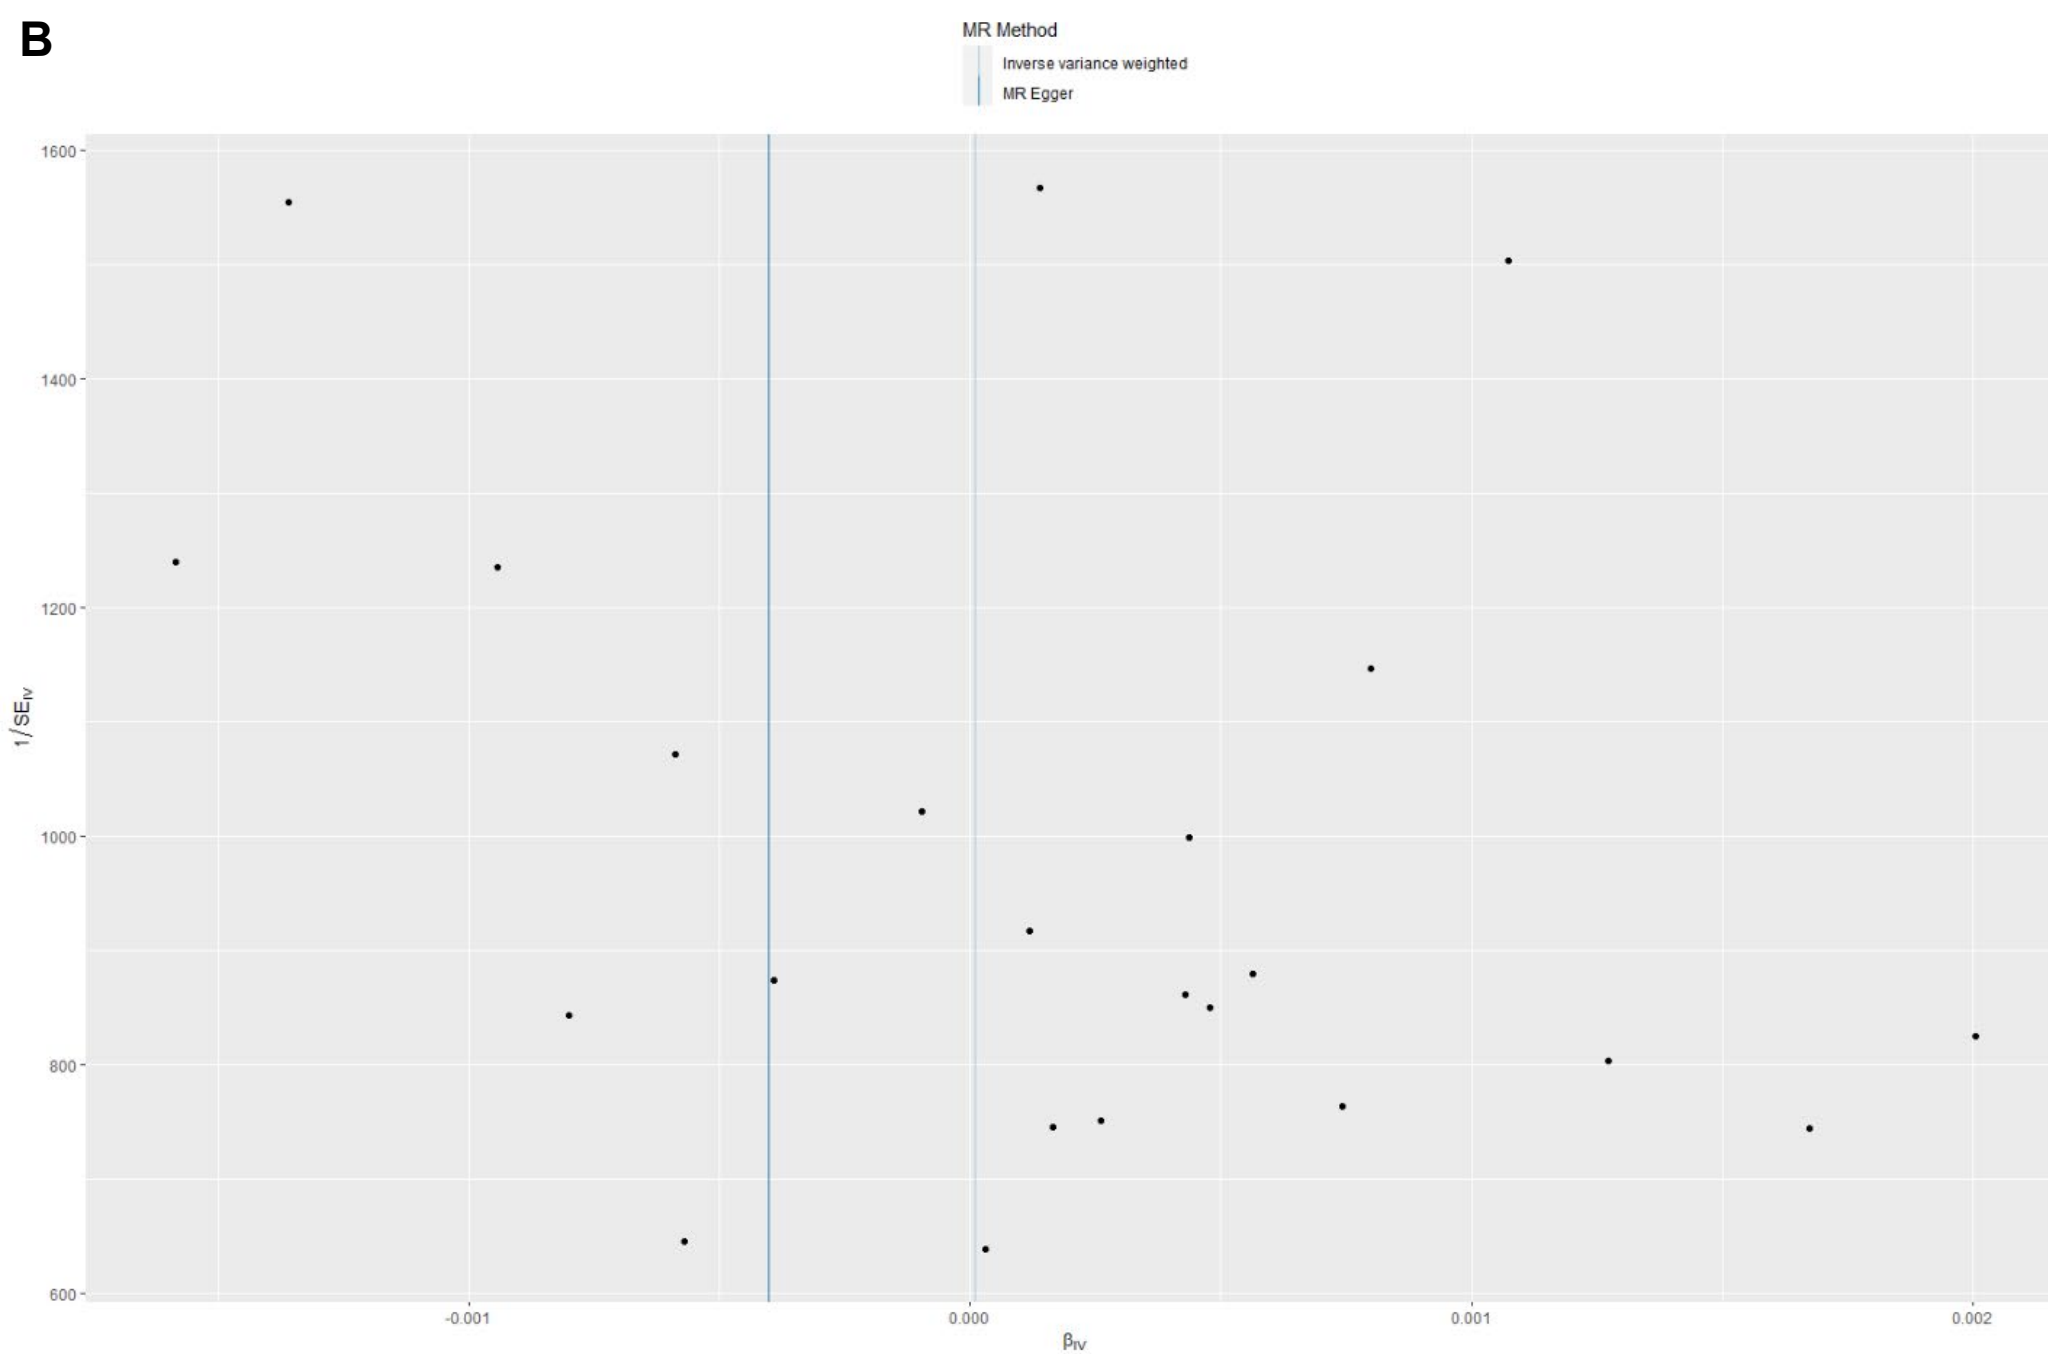

Supplementary Figure 16. Scatter plot (A) and funnel plot (B) of the causal effect of endometriosis on brain cancer.



**A**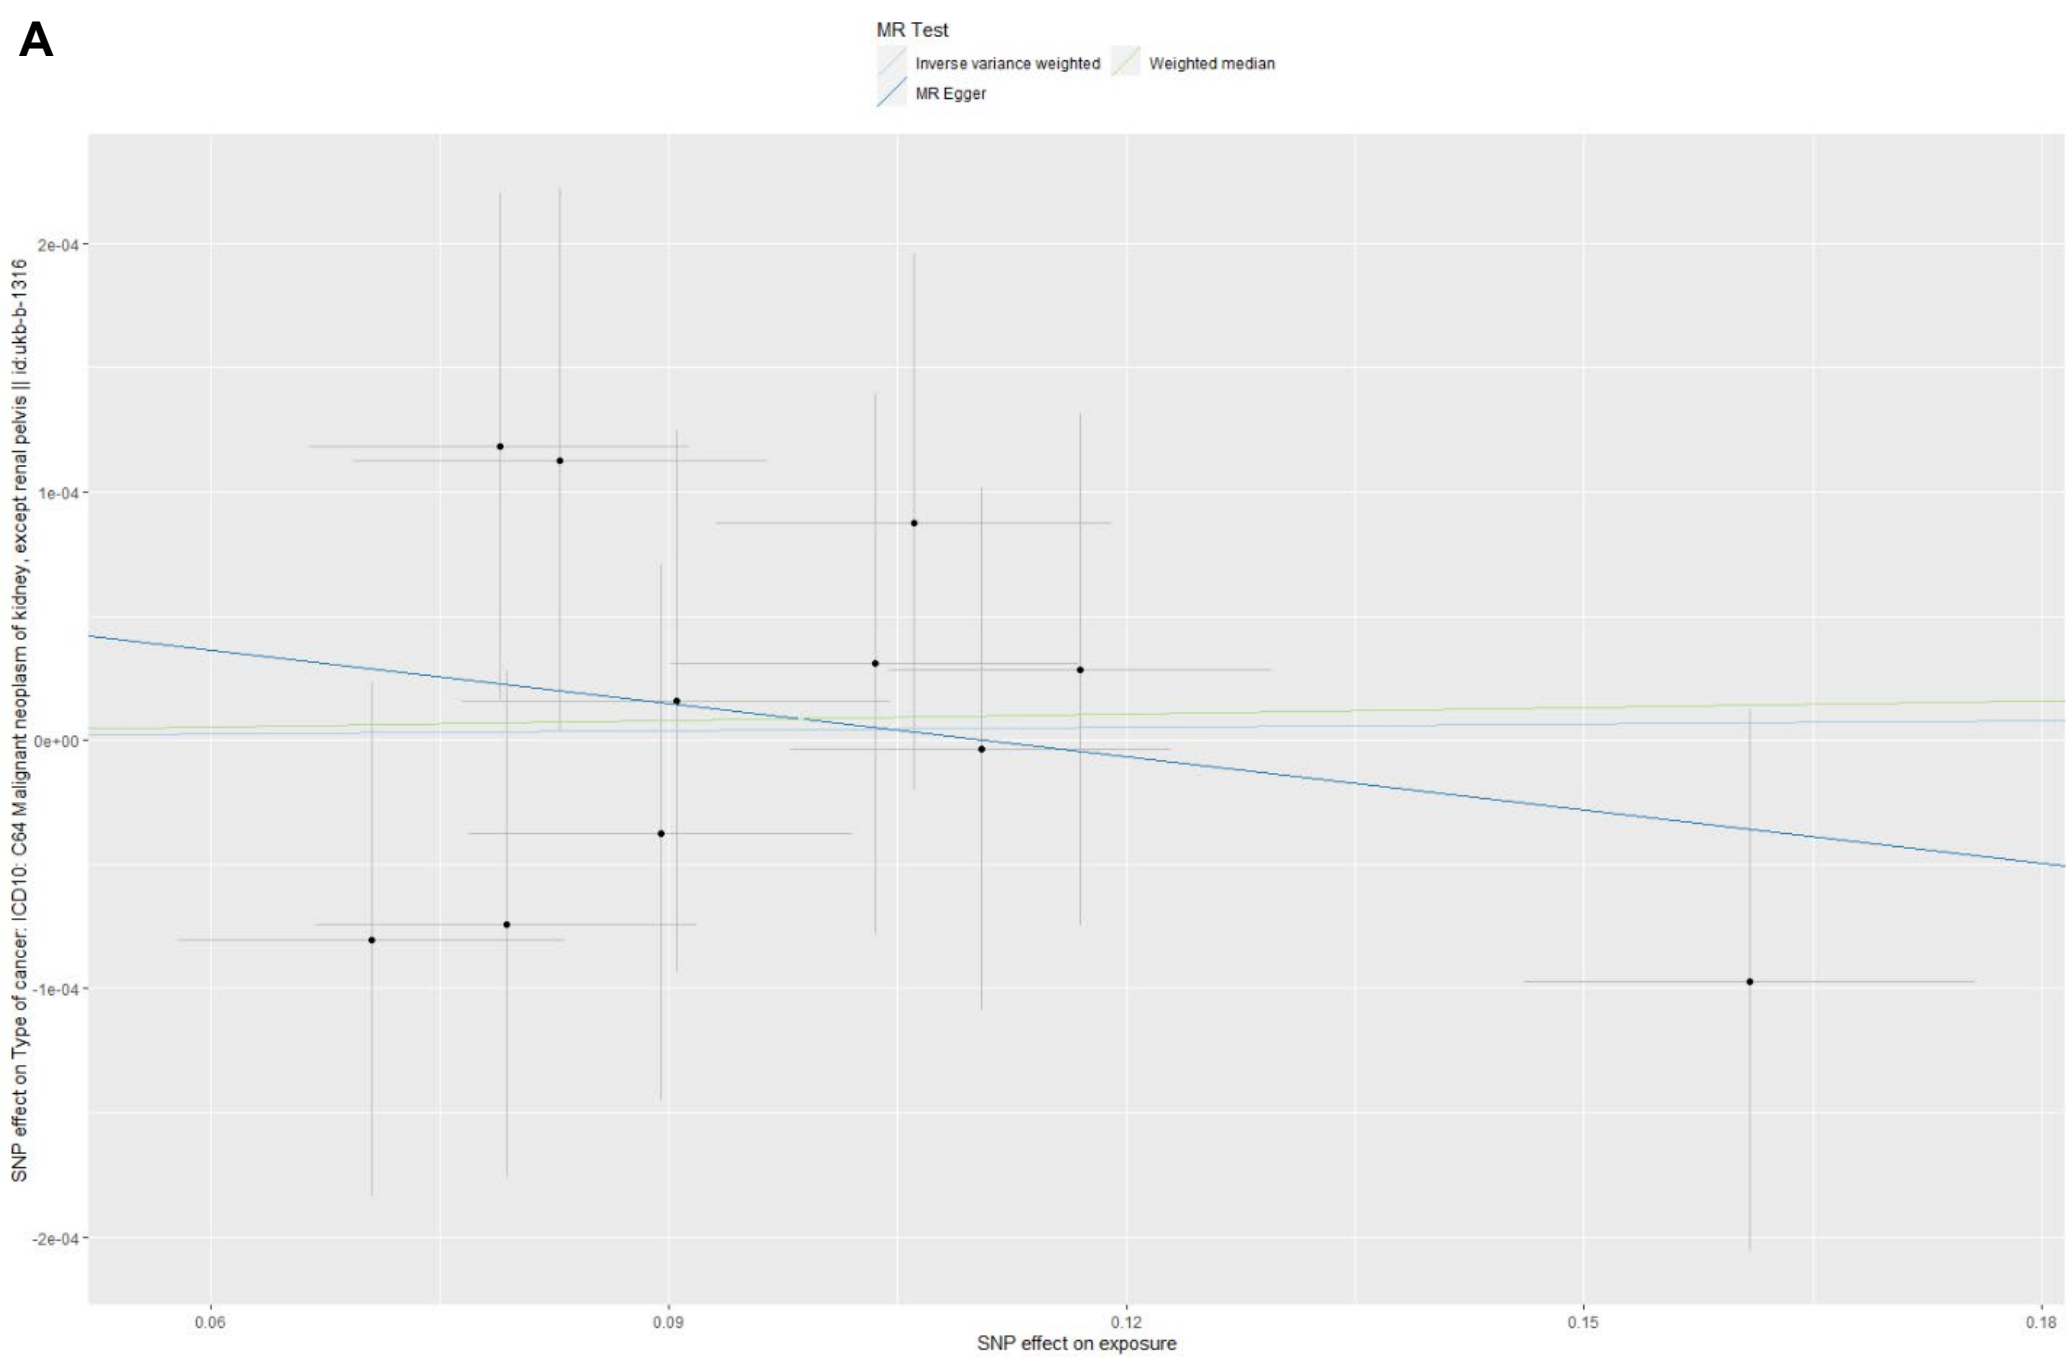

Supplementary Figure 17. Scatter plot (A) and funnel plot (B) of the causal effect of endometriosis on kidney cancer.

**B**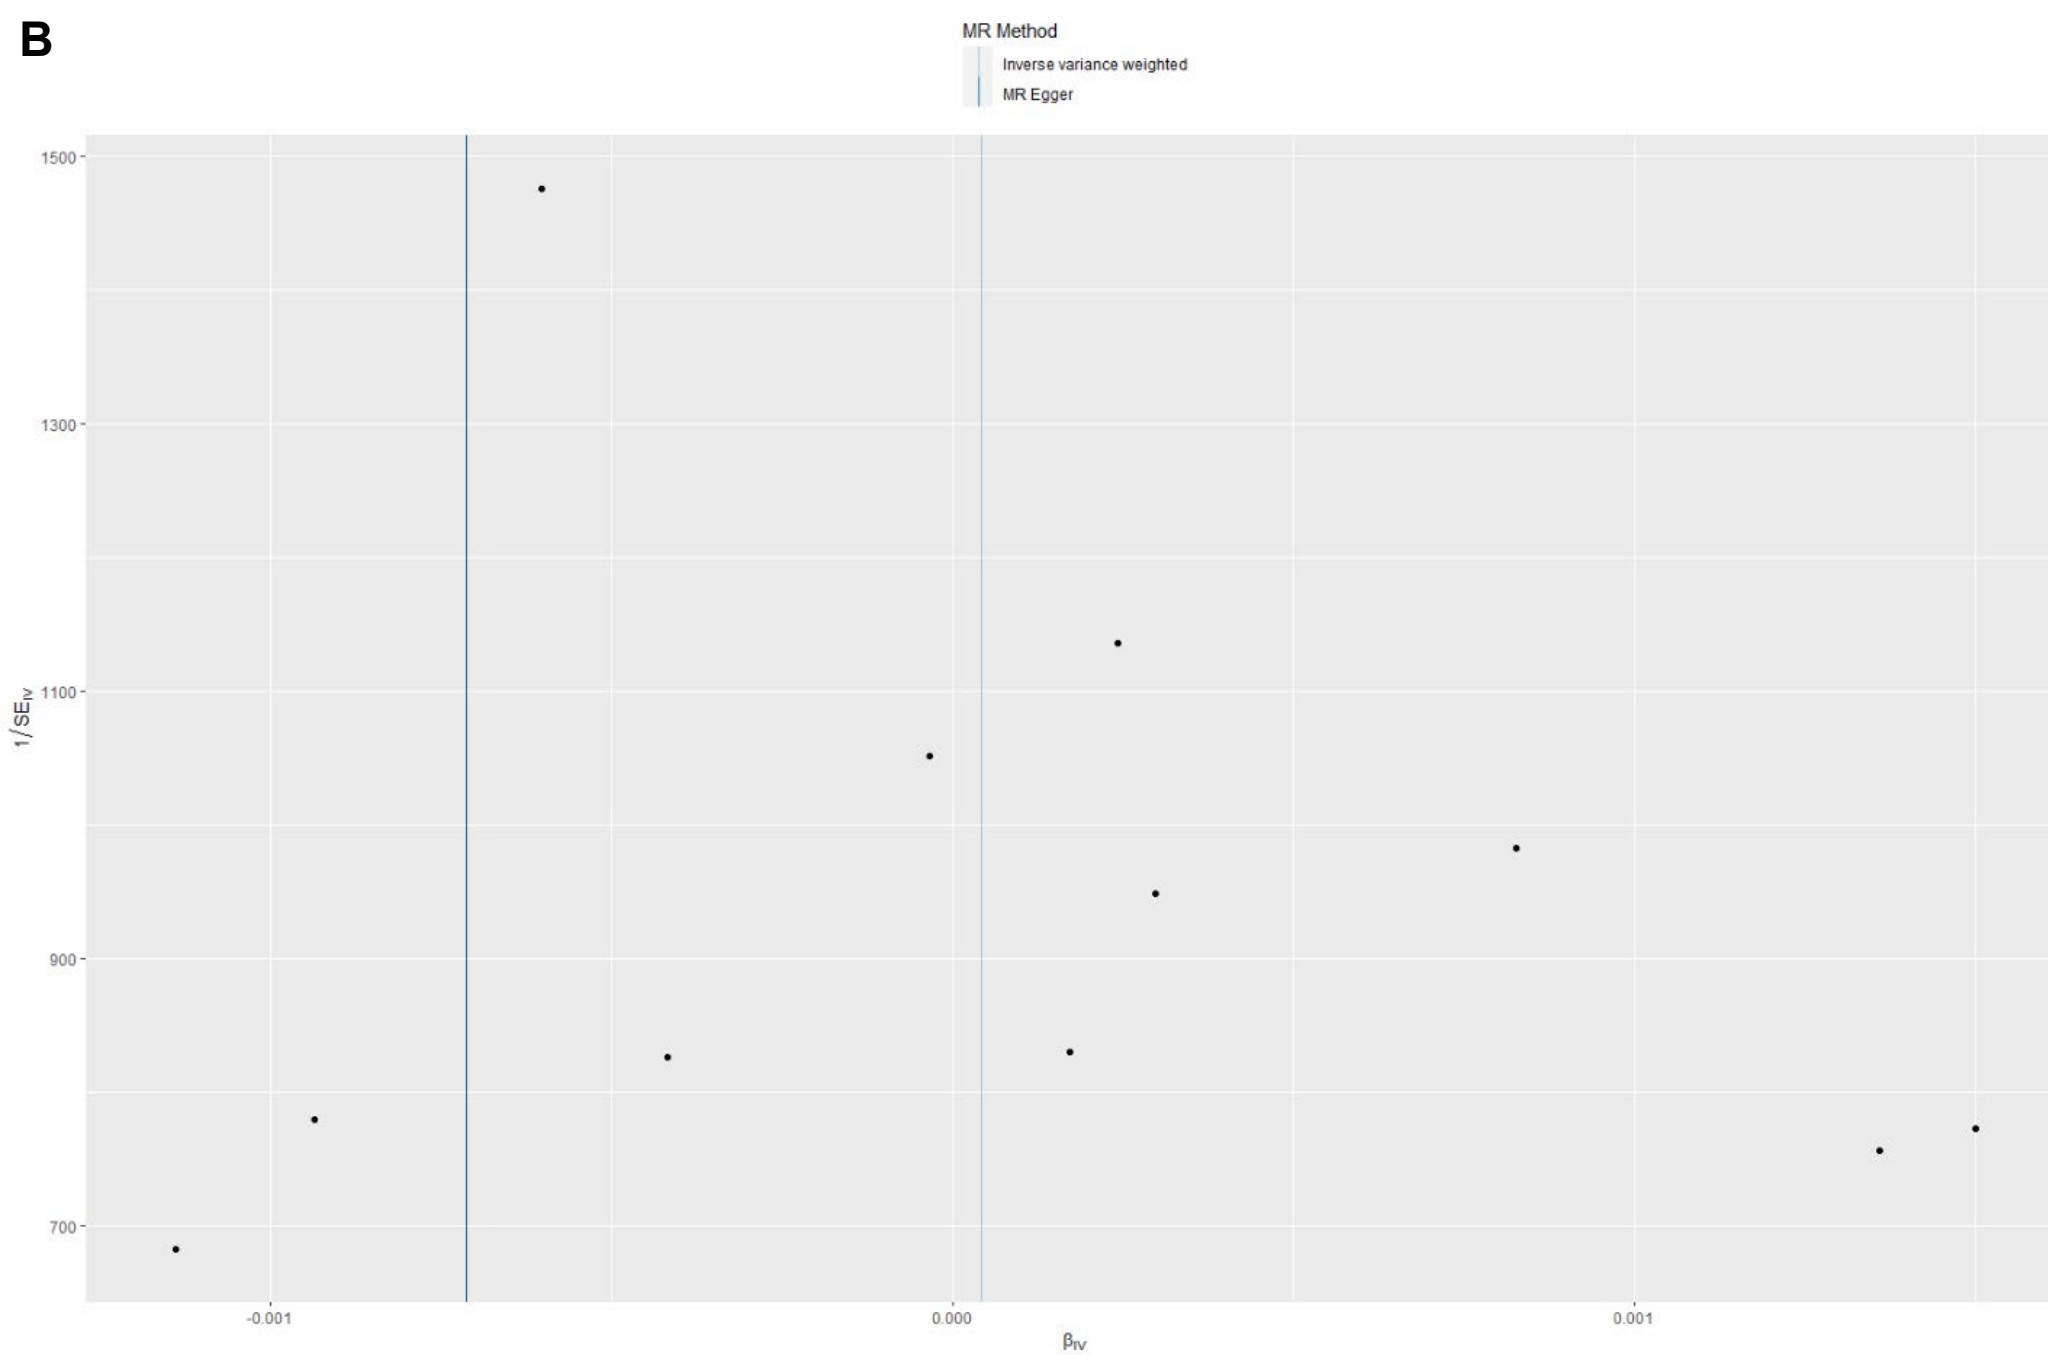

Supplementary Figure 17. Scatter plot (A) and funnel plot (B) of the causal effect of endometriosis on kidney cancer.

**A**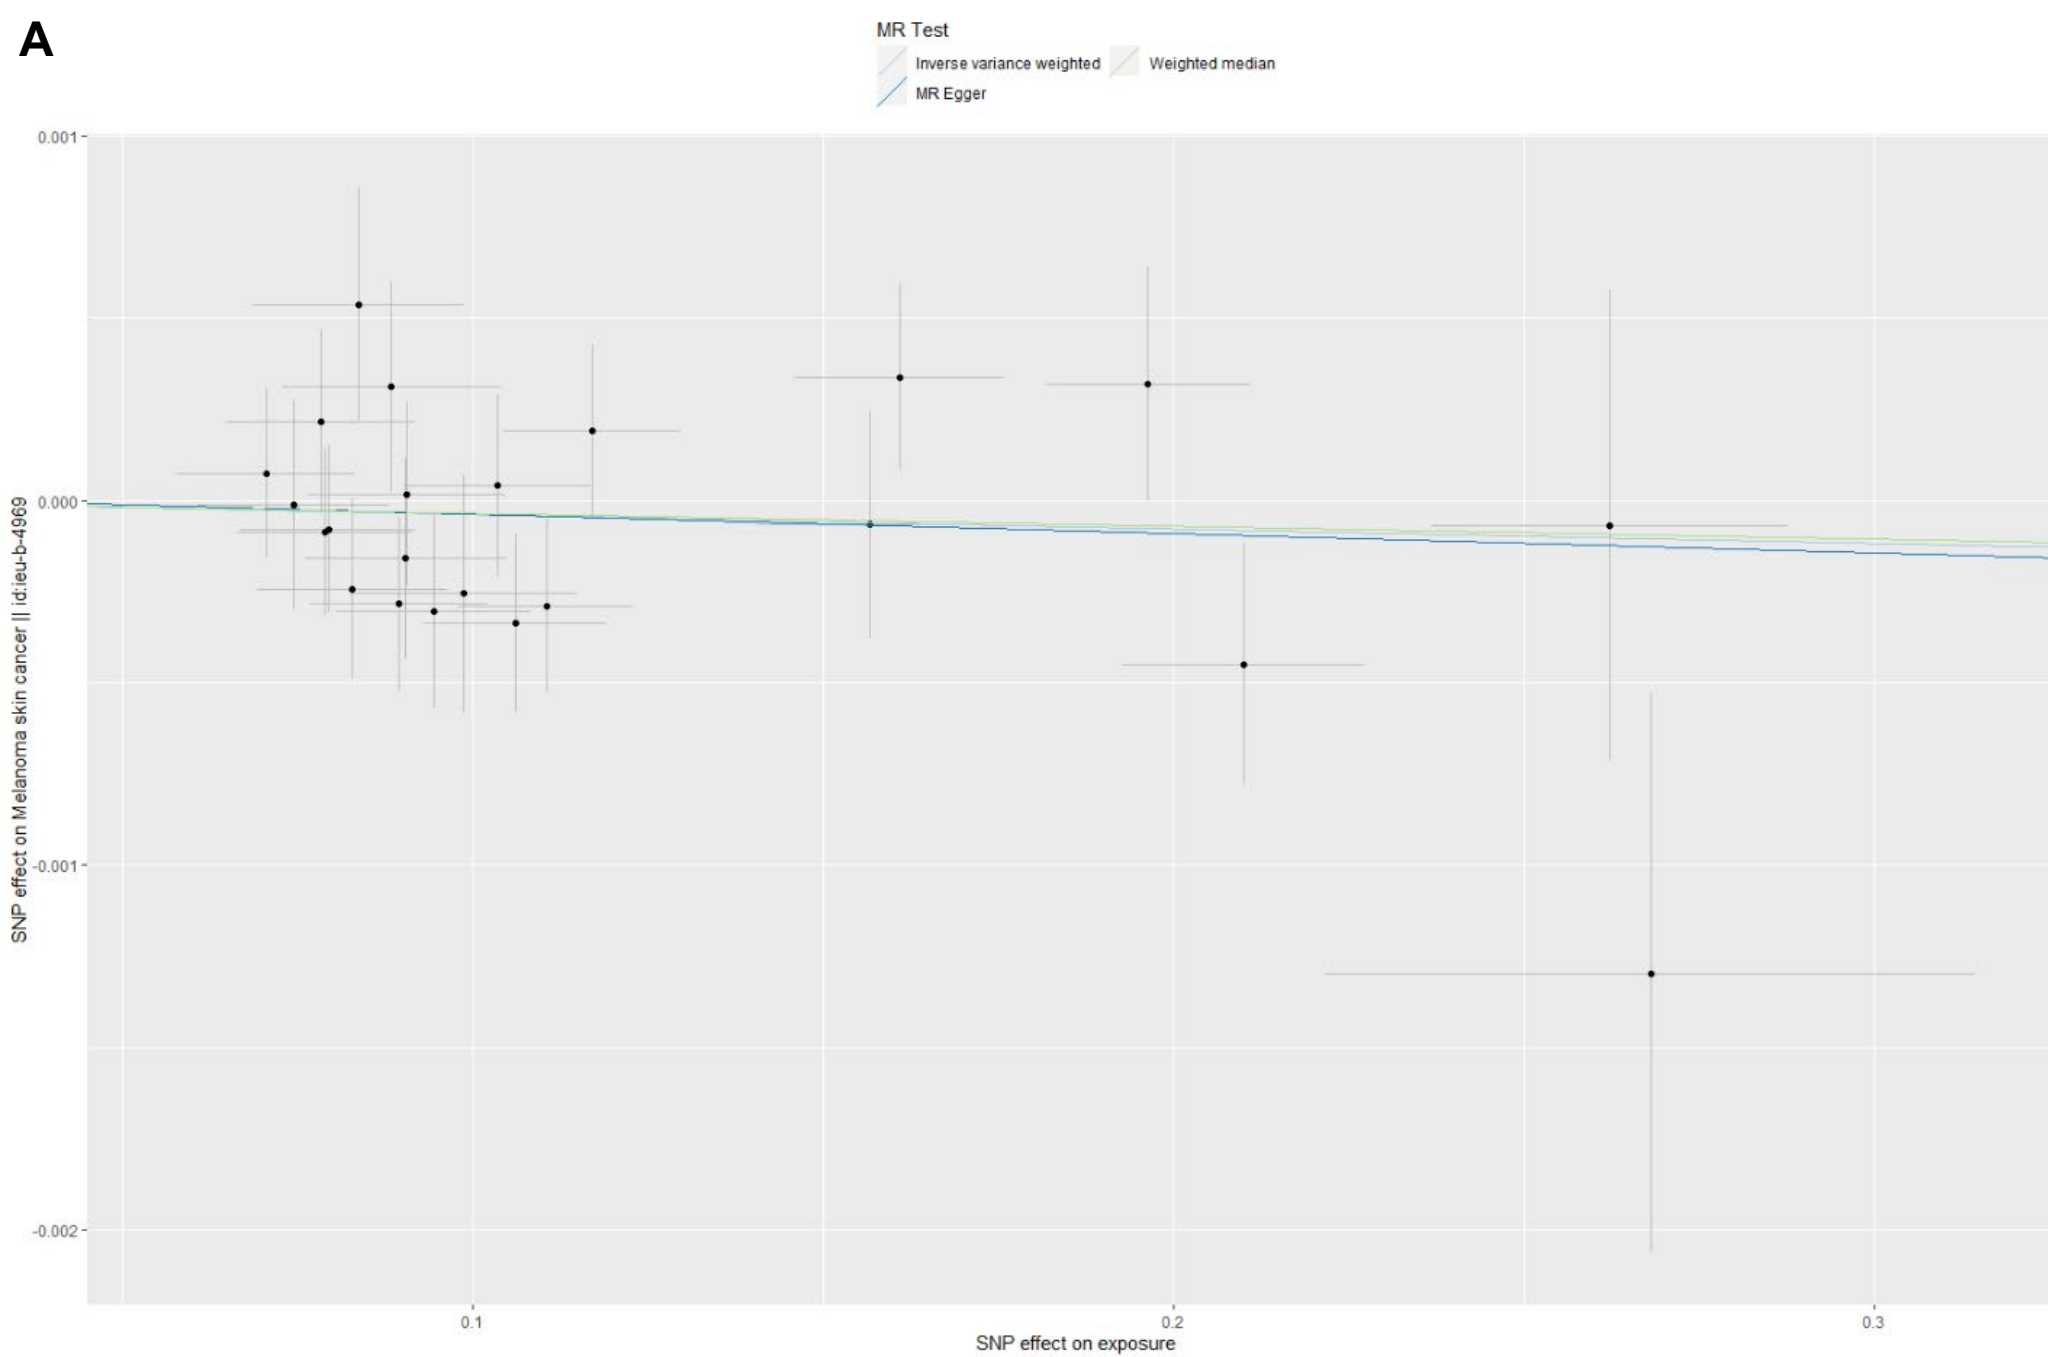

Supplementary Figure 18. Scatter plot (A) and funnel plot (B) of the causal effect of endometriosis on melanoma.

**B**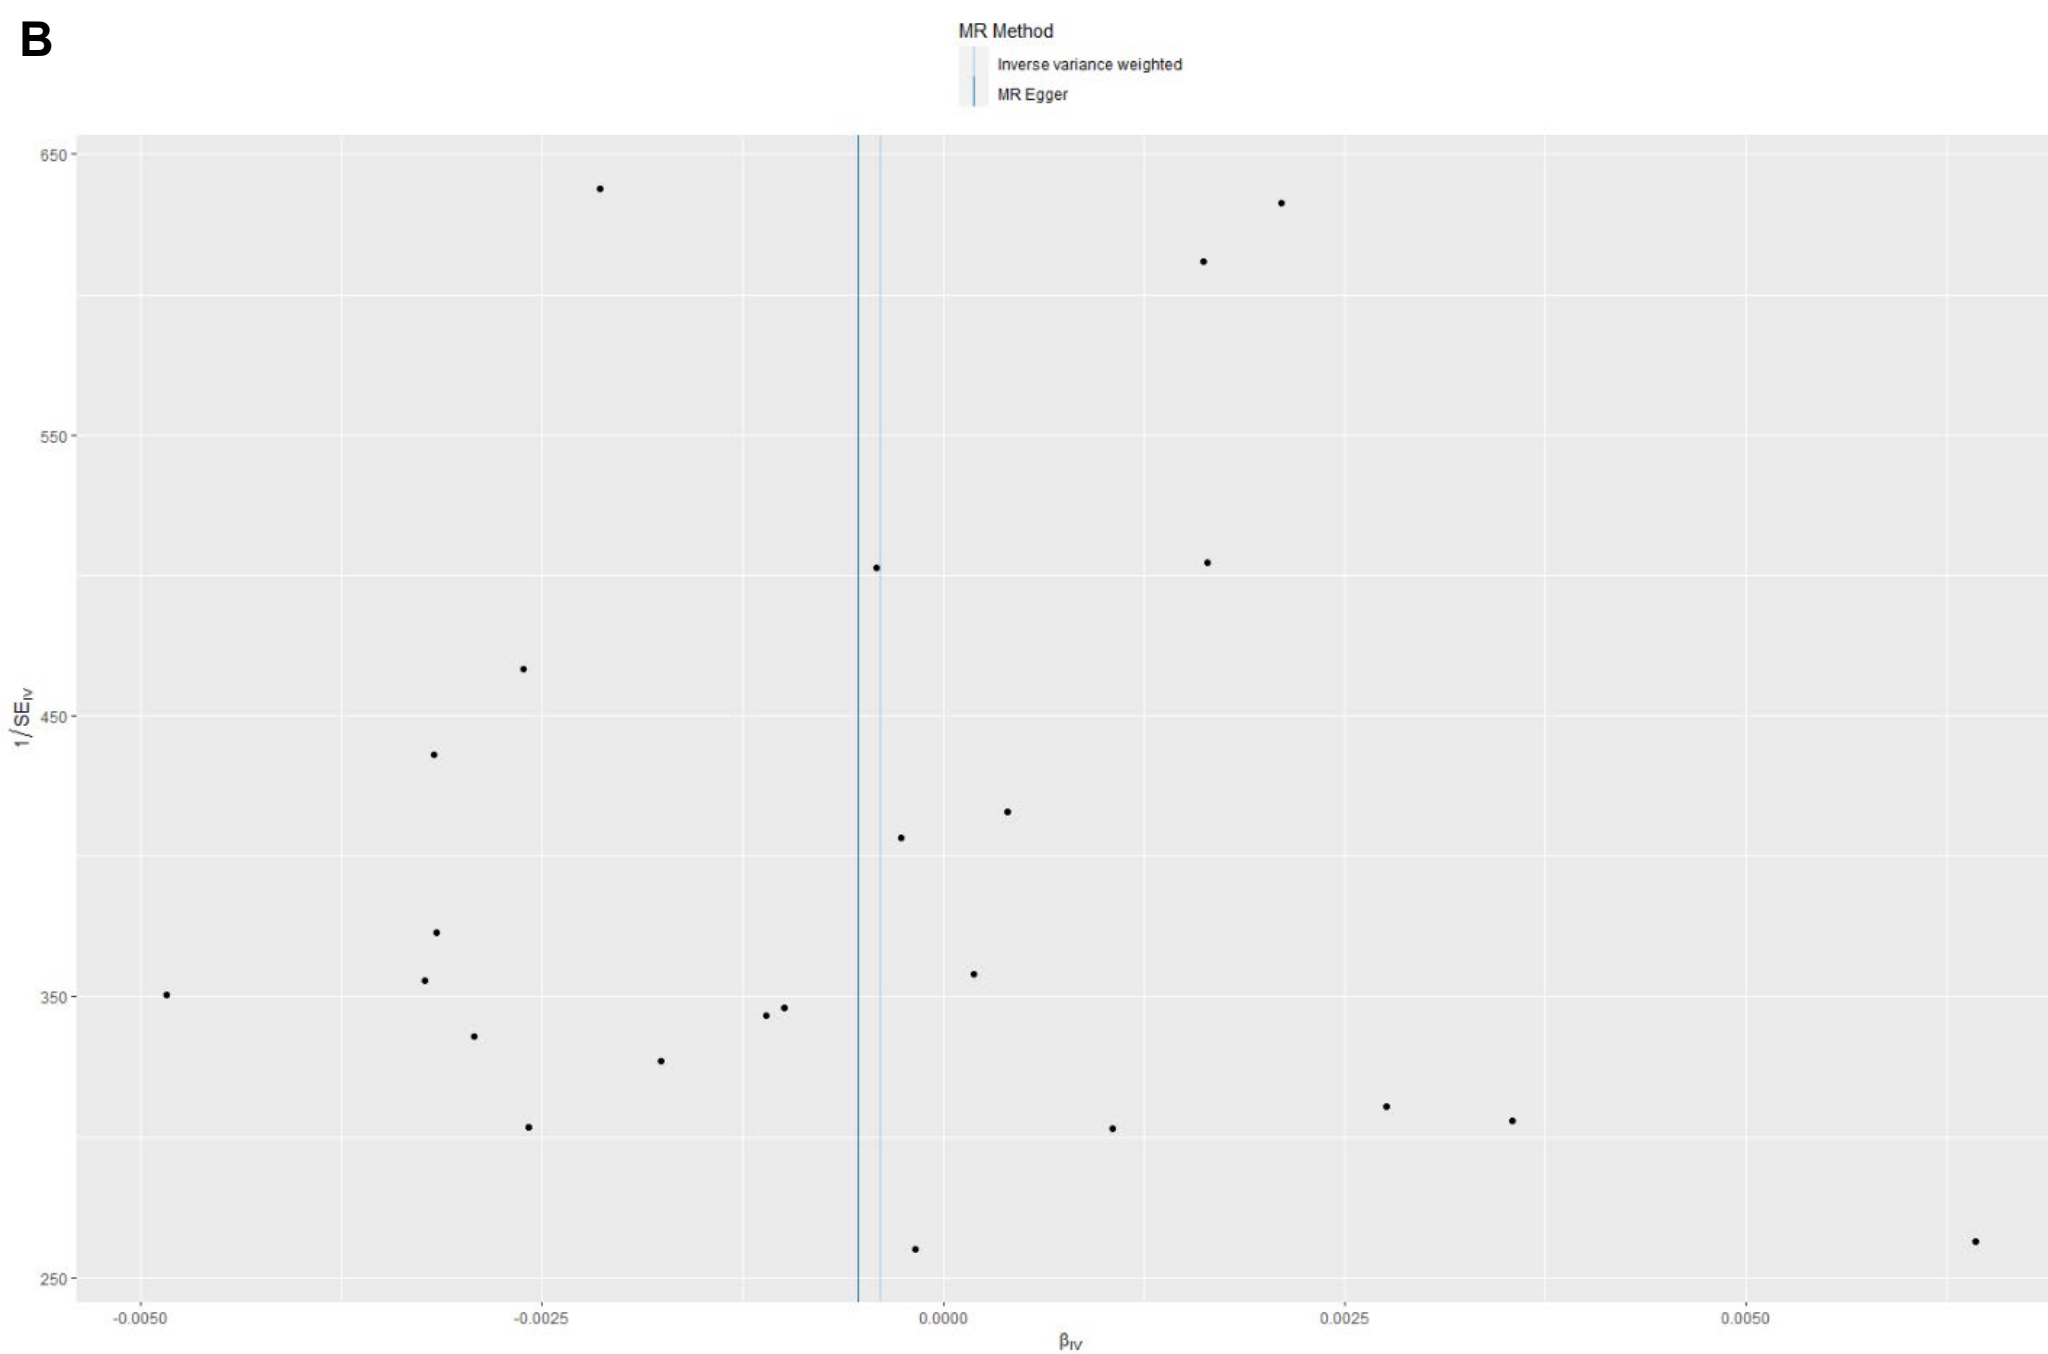

Supplementary Figure 18. Scatter plot (A) and funnel plot (B) of the causal effect of endometriosis on melanoma.

**A**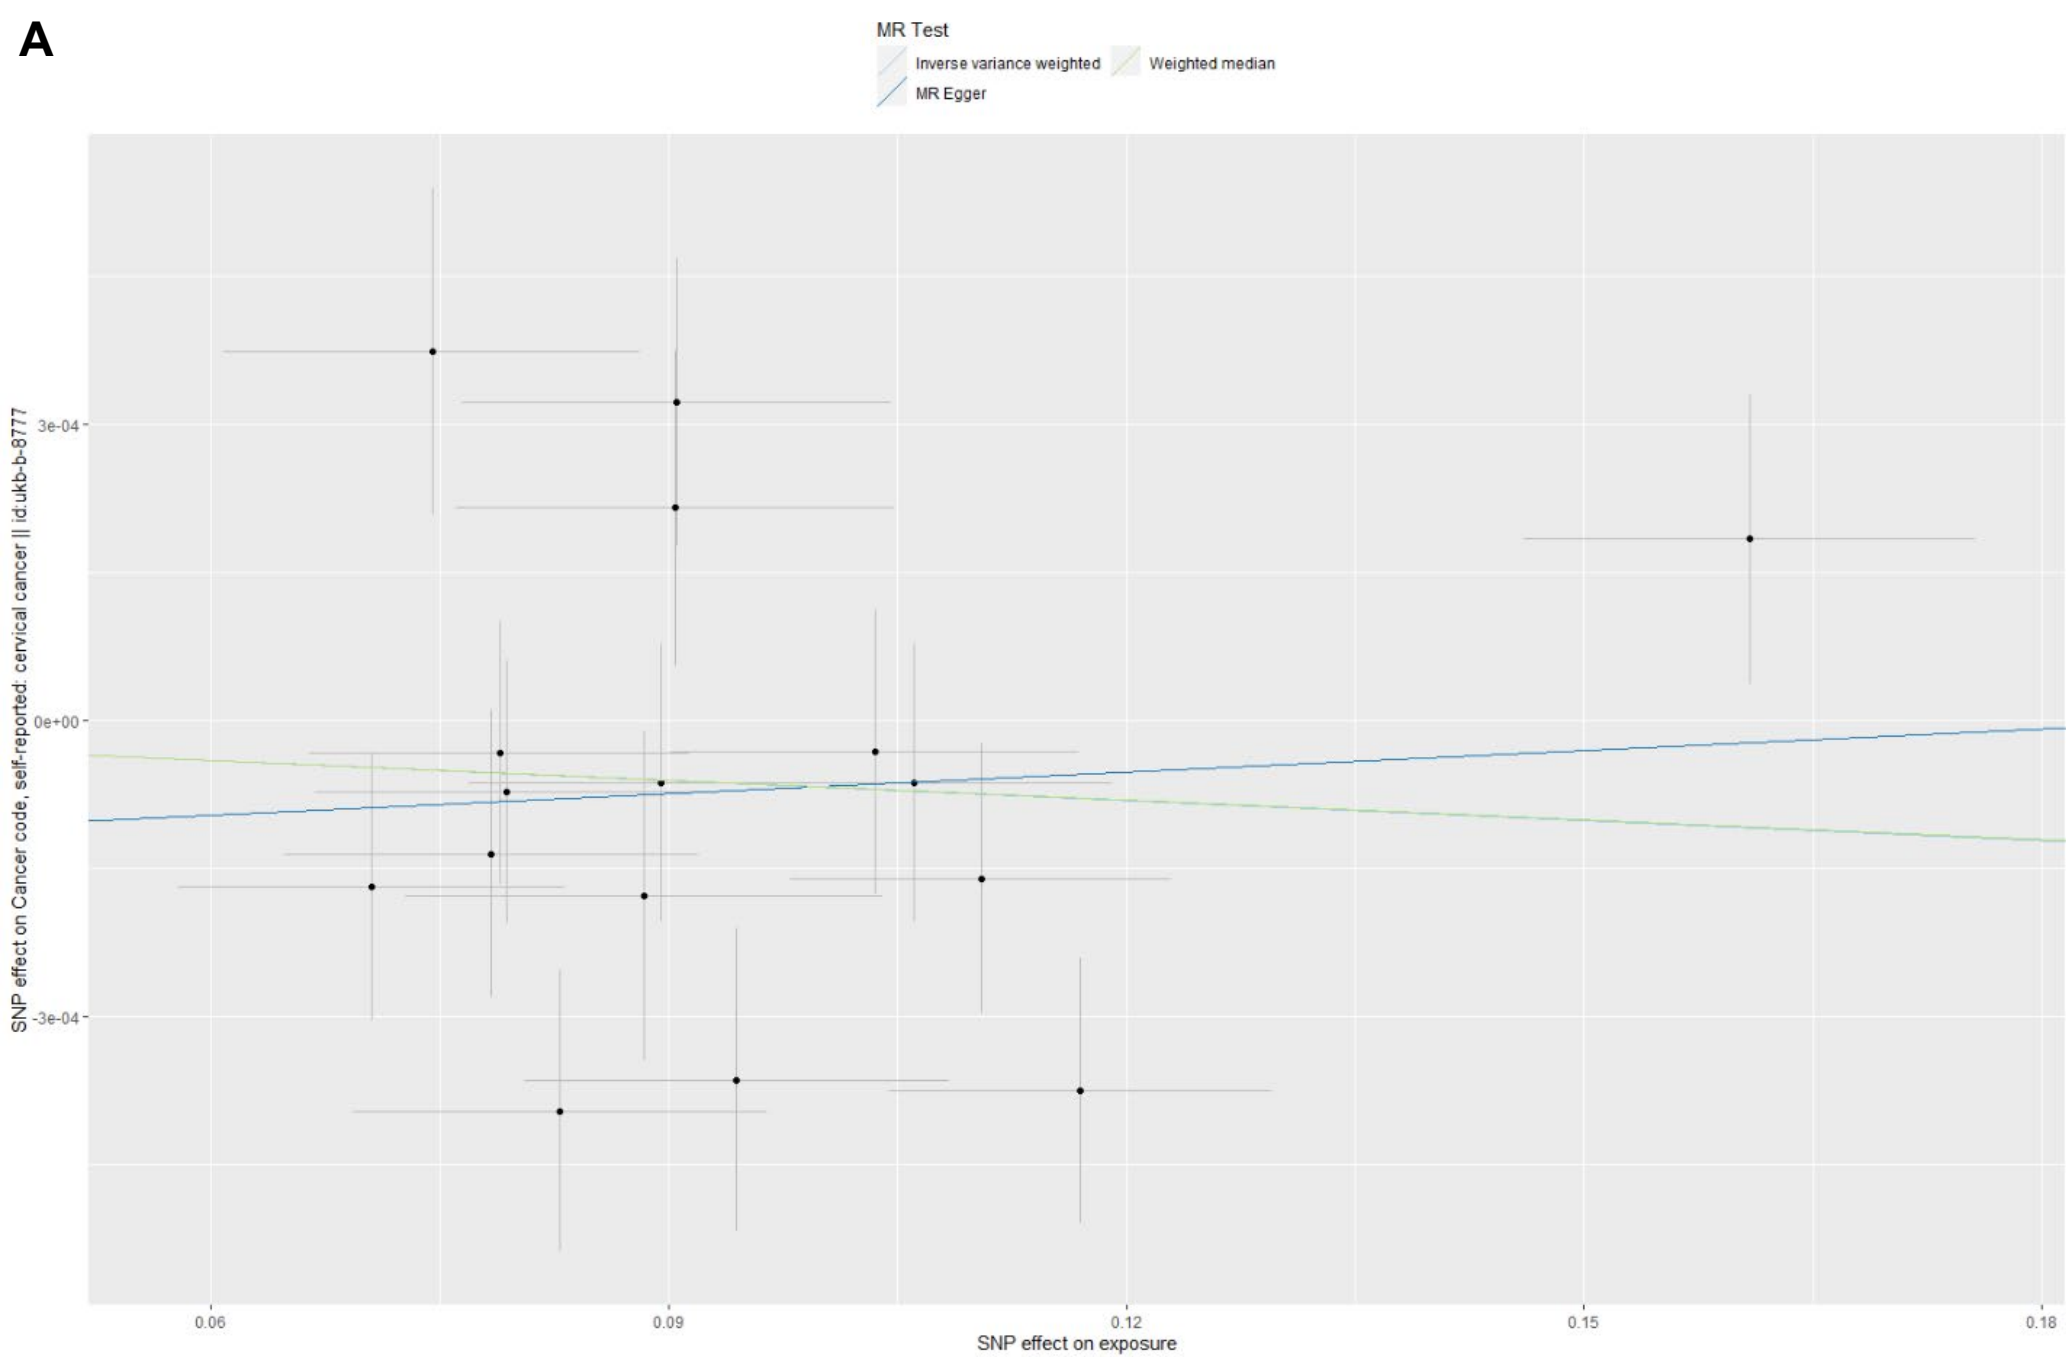

Supplementary Figure 19. Scatter plot (A) and funnel plot (B) of the causal effect of endometriosis on cervical cancer.

**B**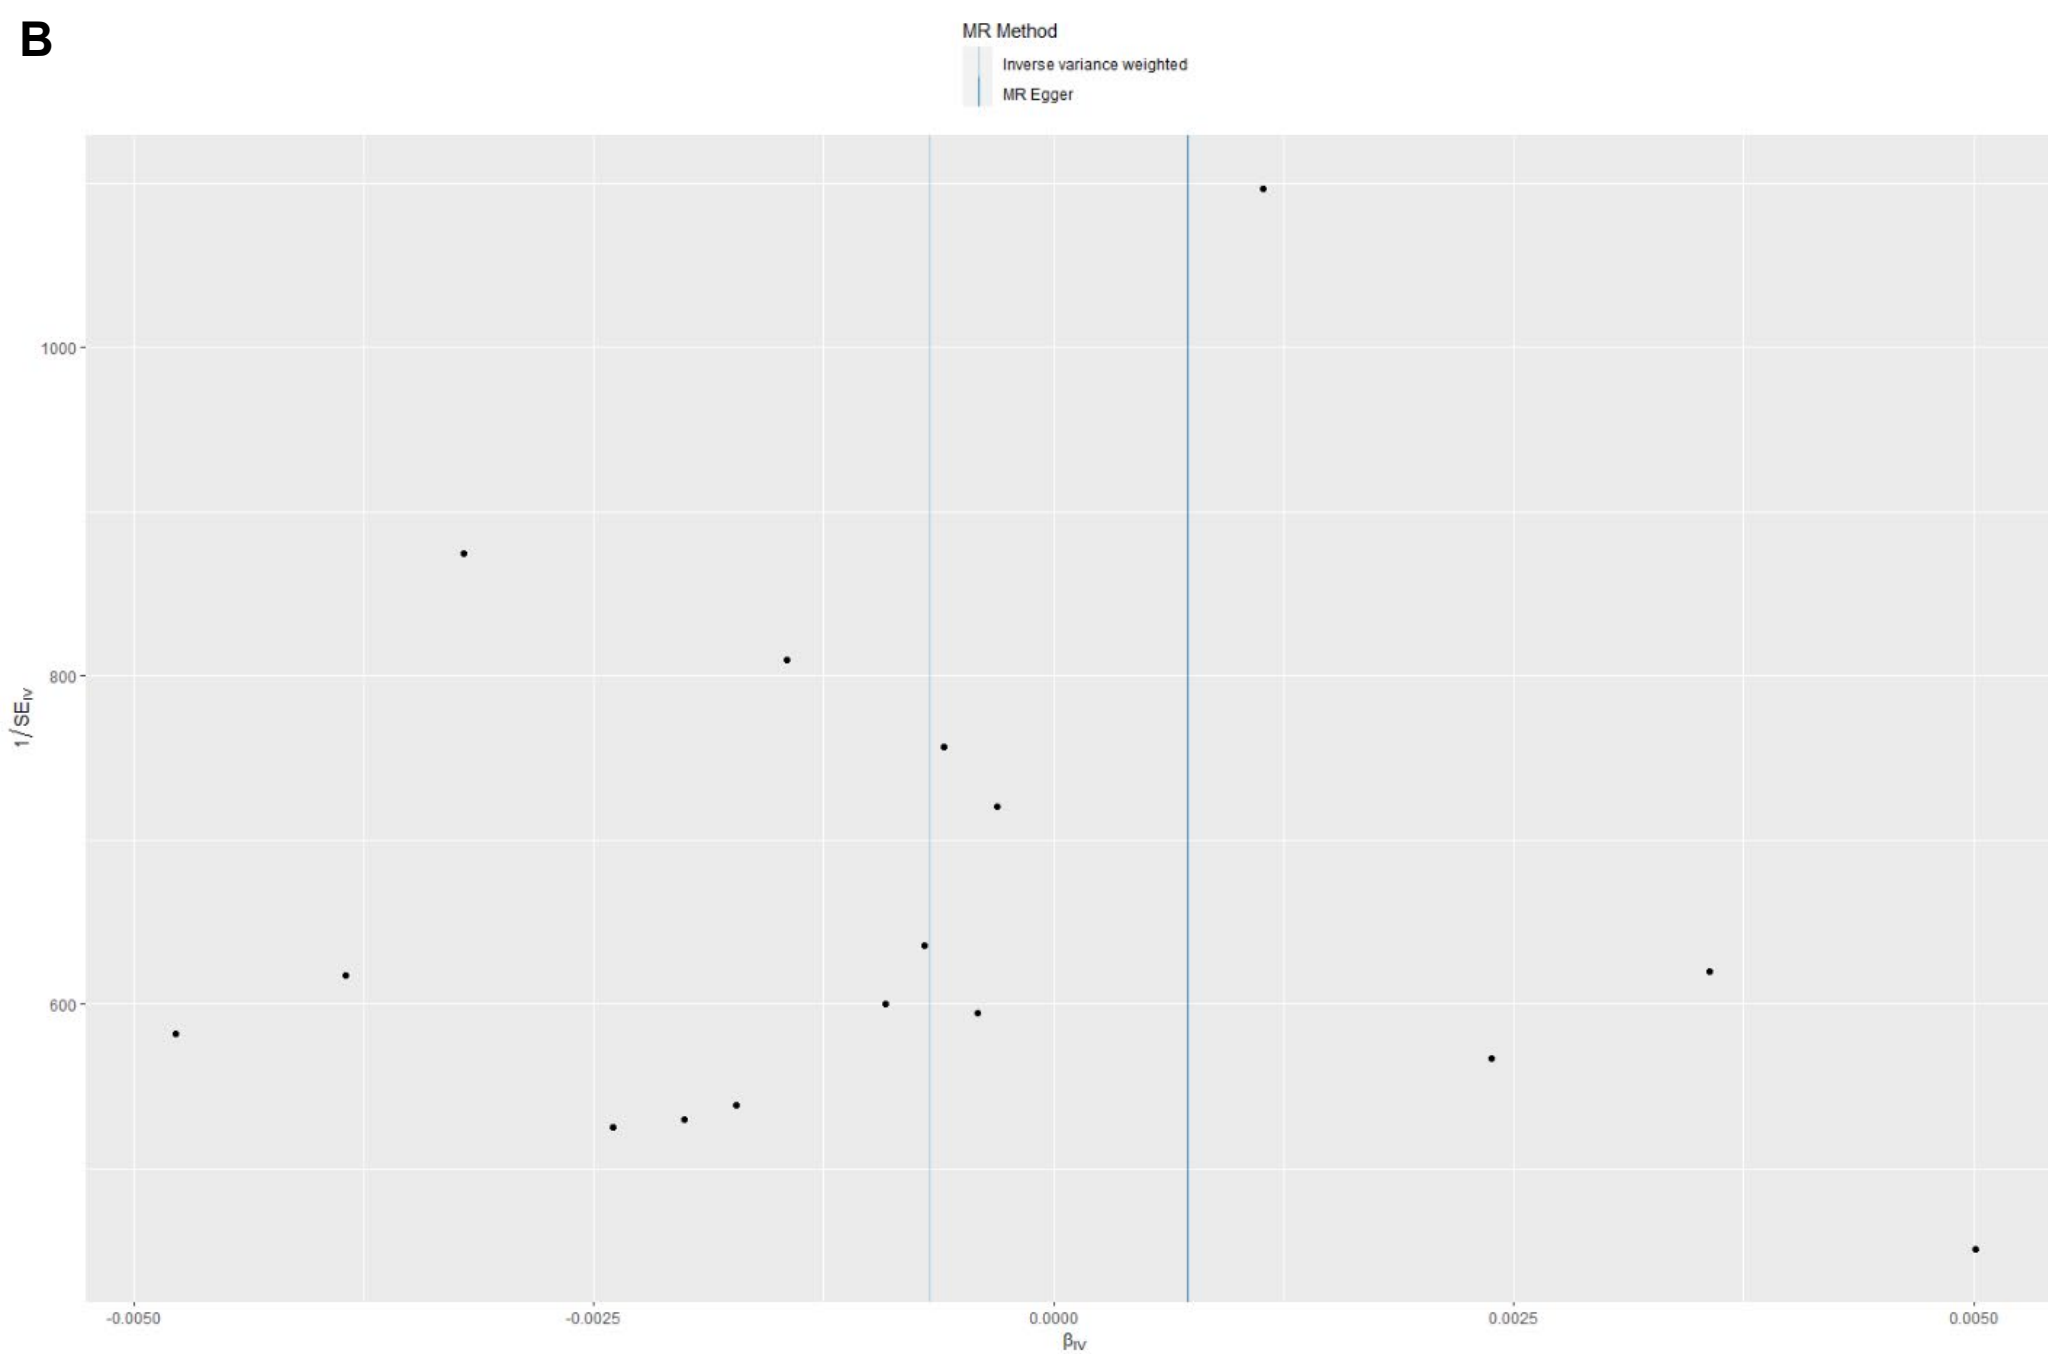

Supplementary Figure 19. Scatter plot (A) and funnel plot (B) of the causal effect of endometriosis on cervical cancer.

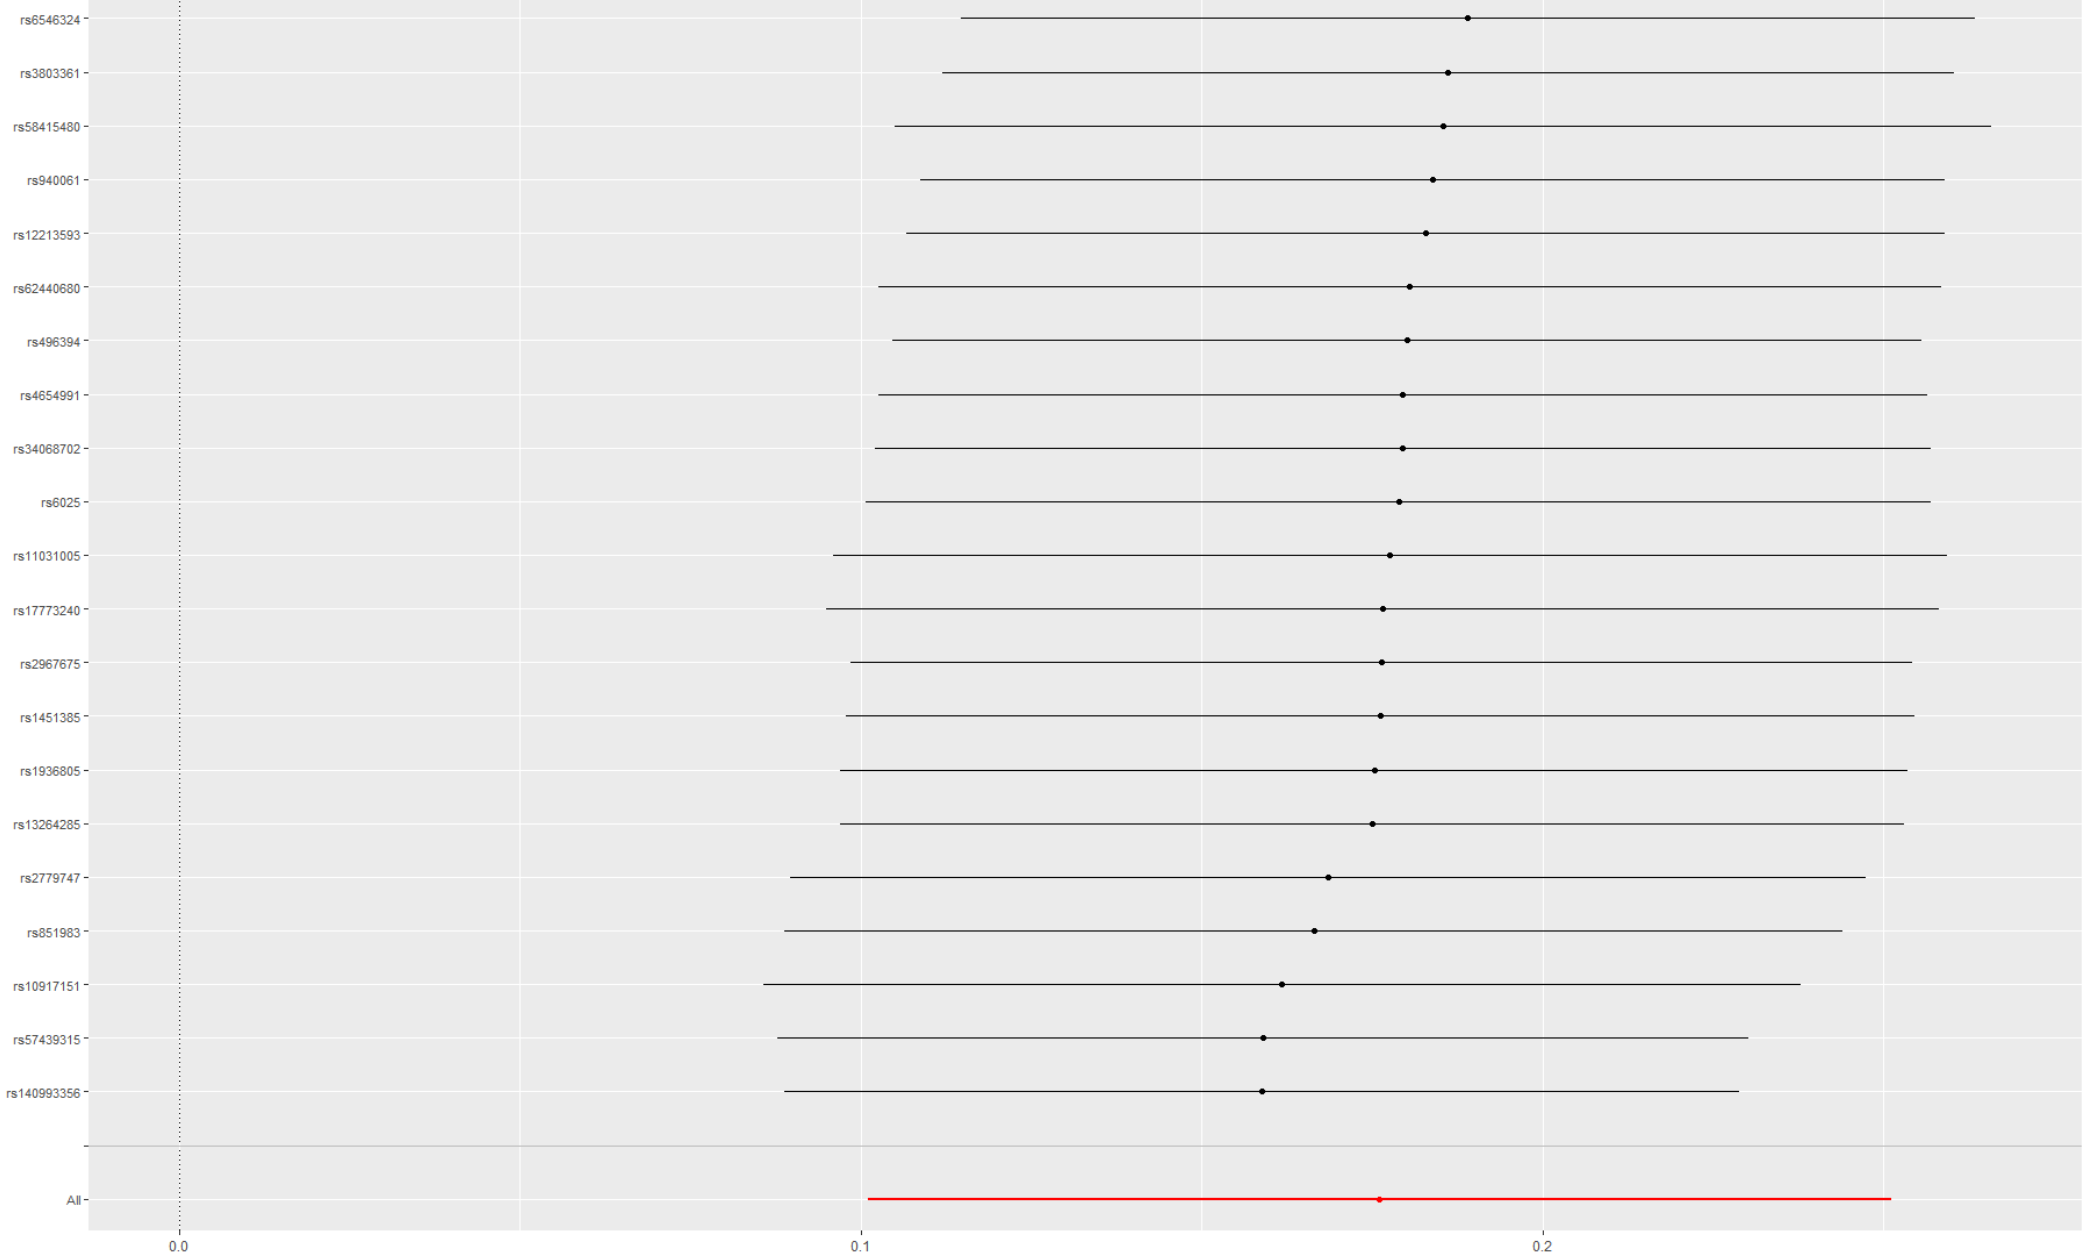

Supplementary Figure 20. Leave-one-out inverse-variance weighted mendelian randomization analyses of endometriosis on ovarian cancer

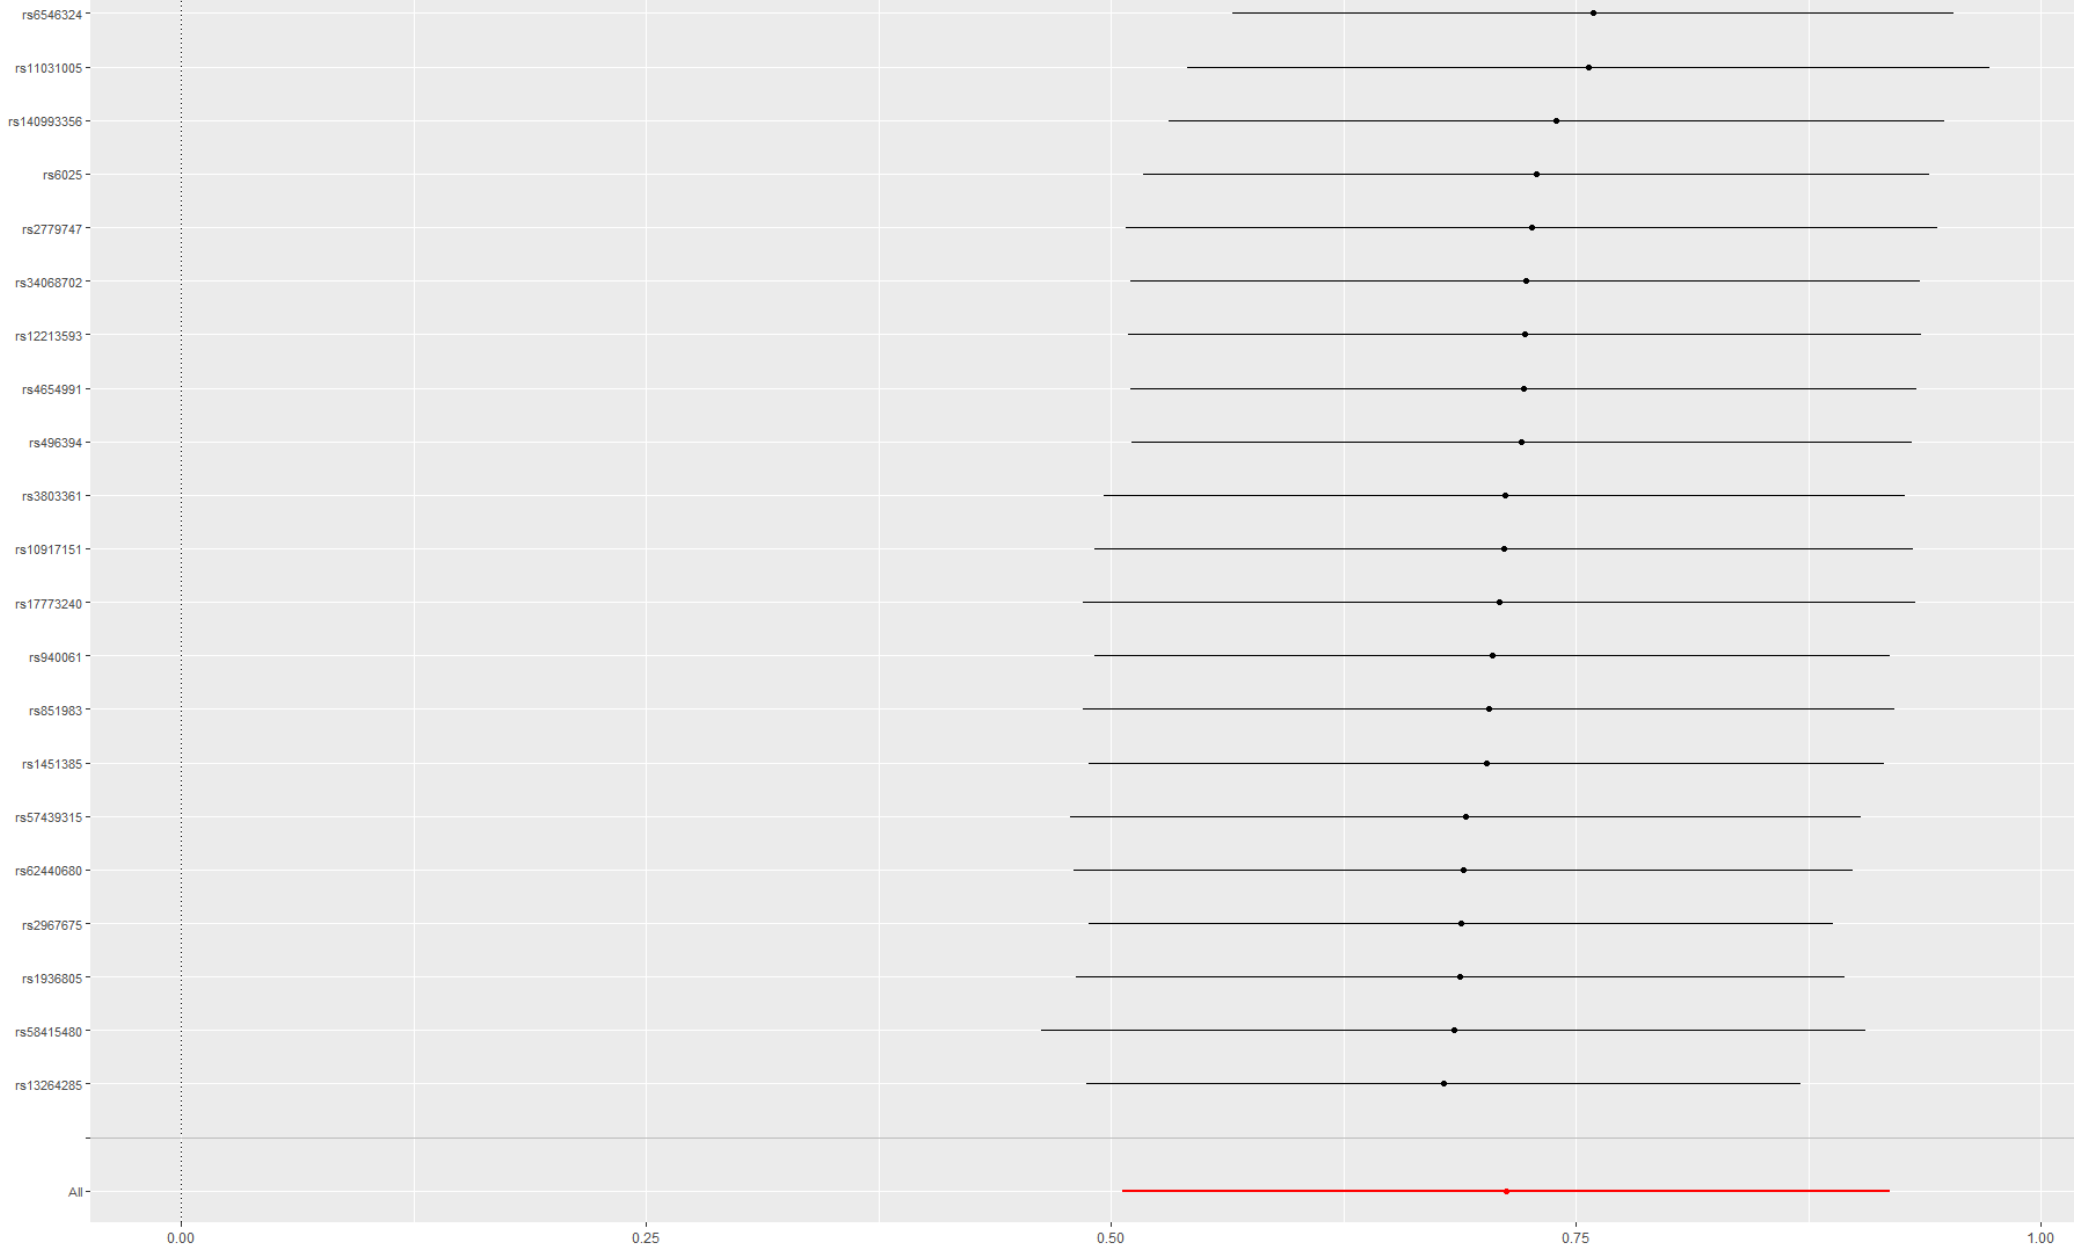

Supplementary Figure 21. Leave-one-out inverse-variance weighted mendelian randomization analyses of endometriosis on clear cell ovarian cancer



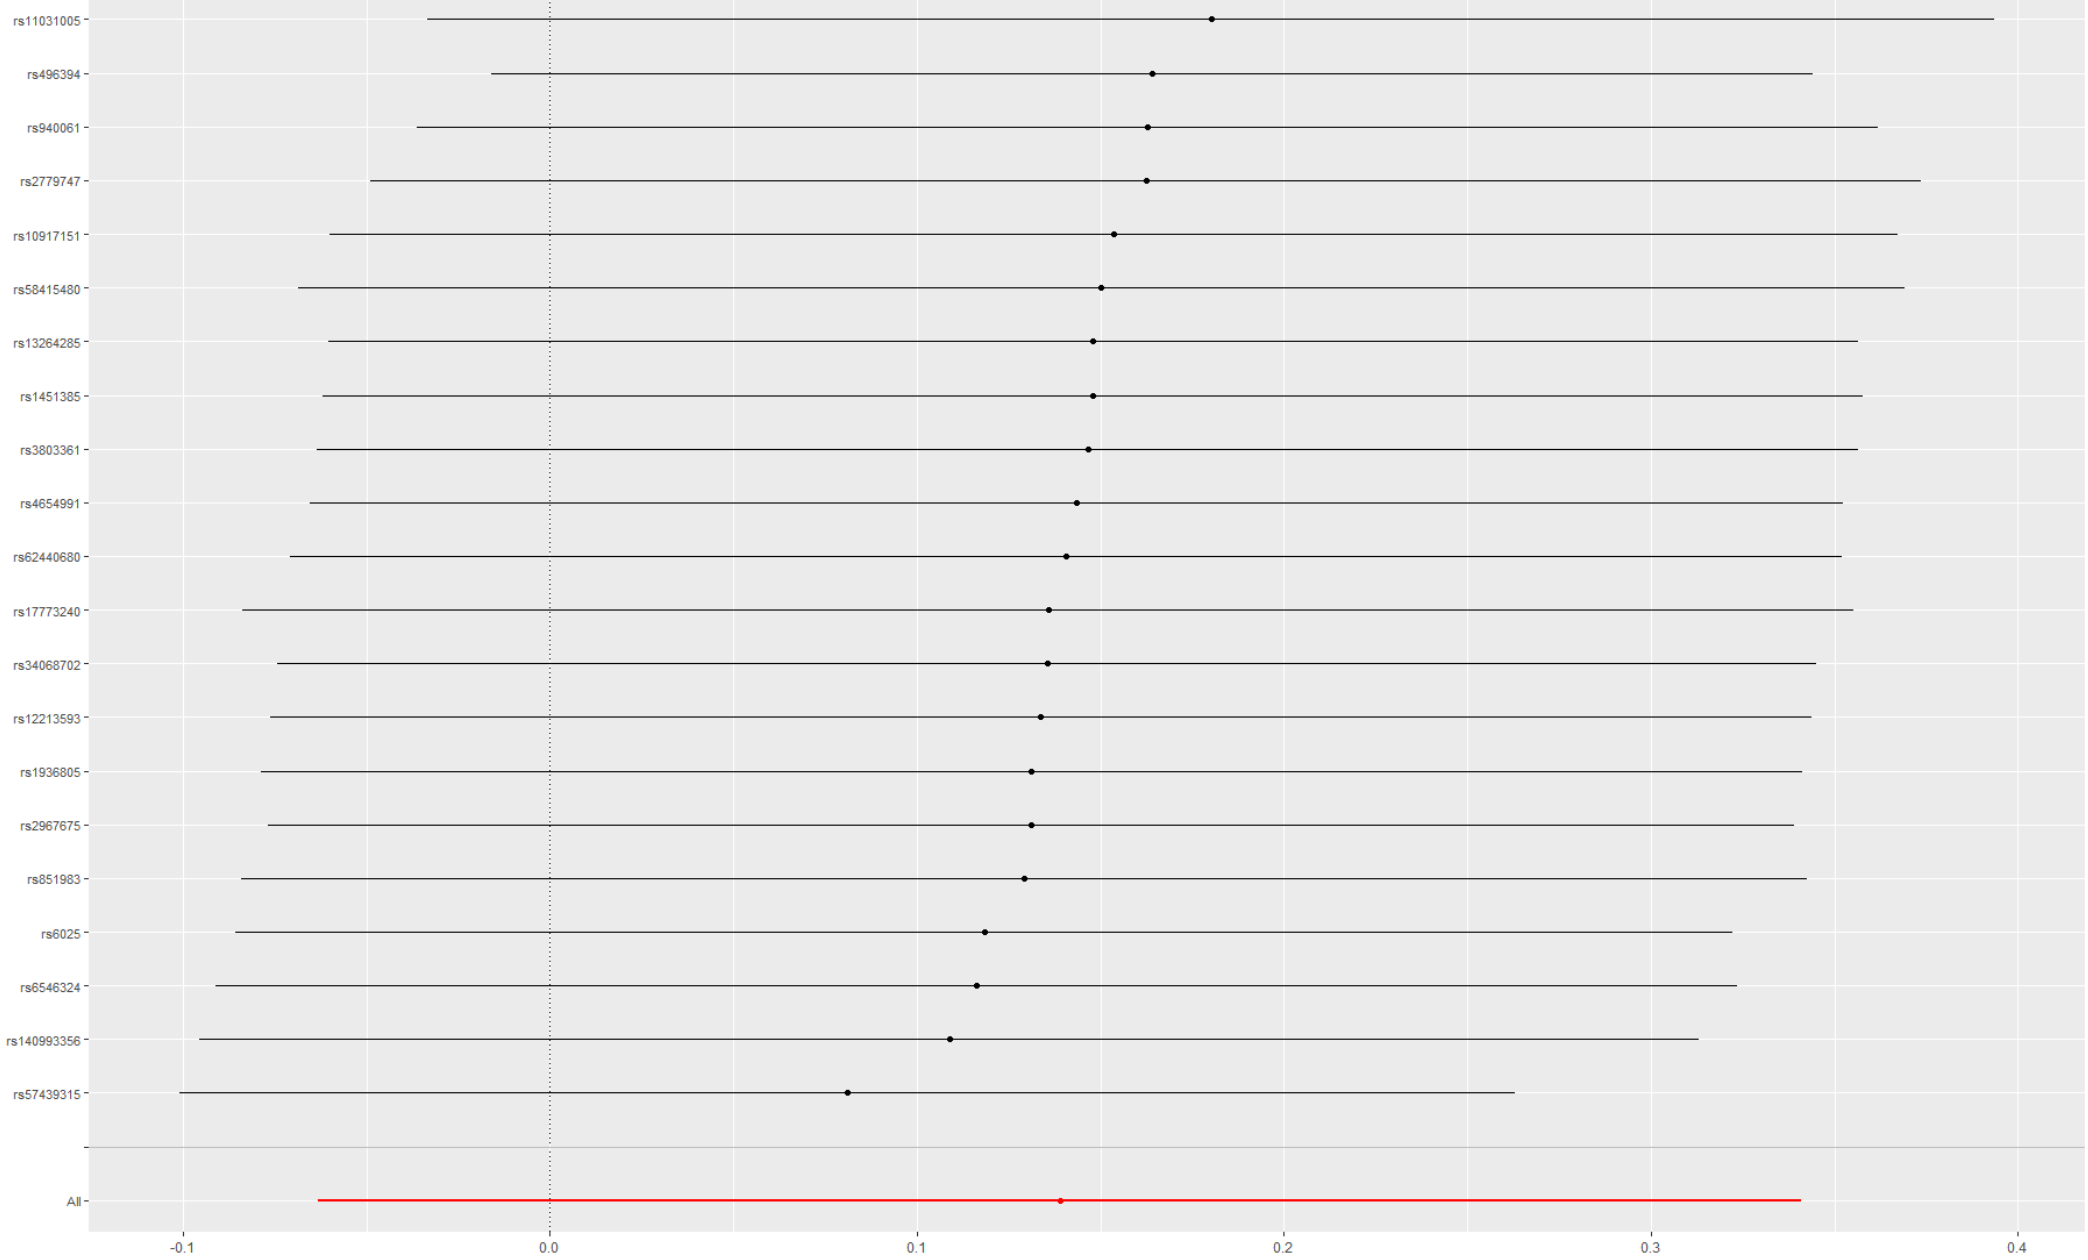

Supplementary Figure 22. Leave-one-out inverse-variance weighted mendelian randomization analyses of endometriosis on invasive mucinous ovarian cancer

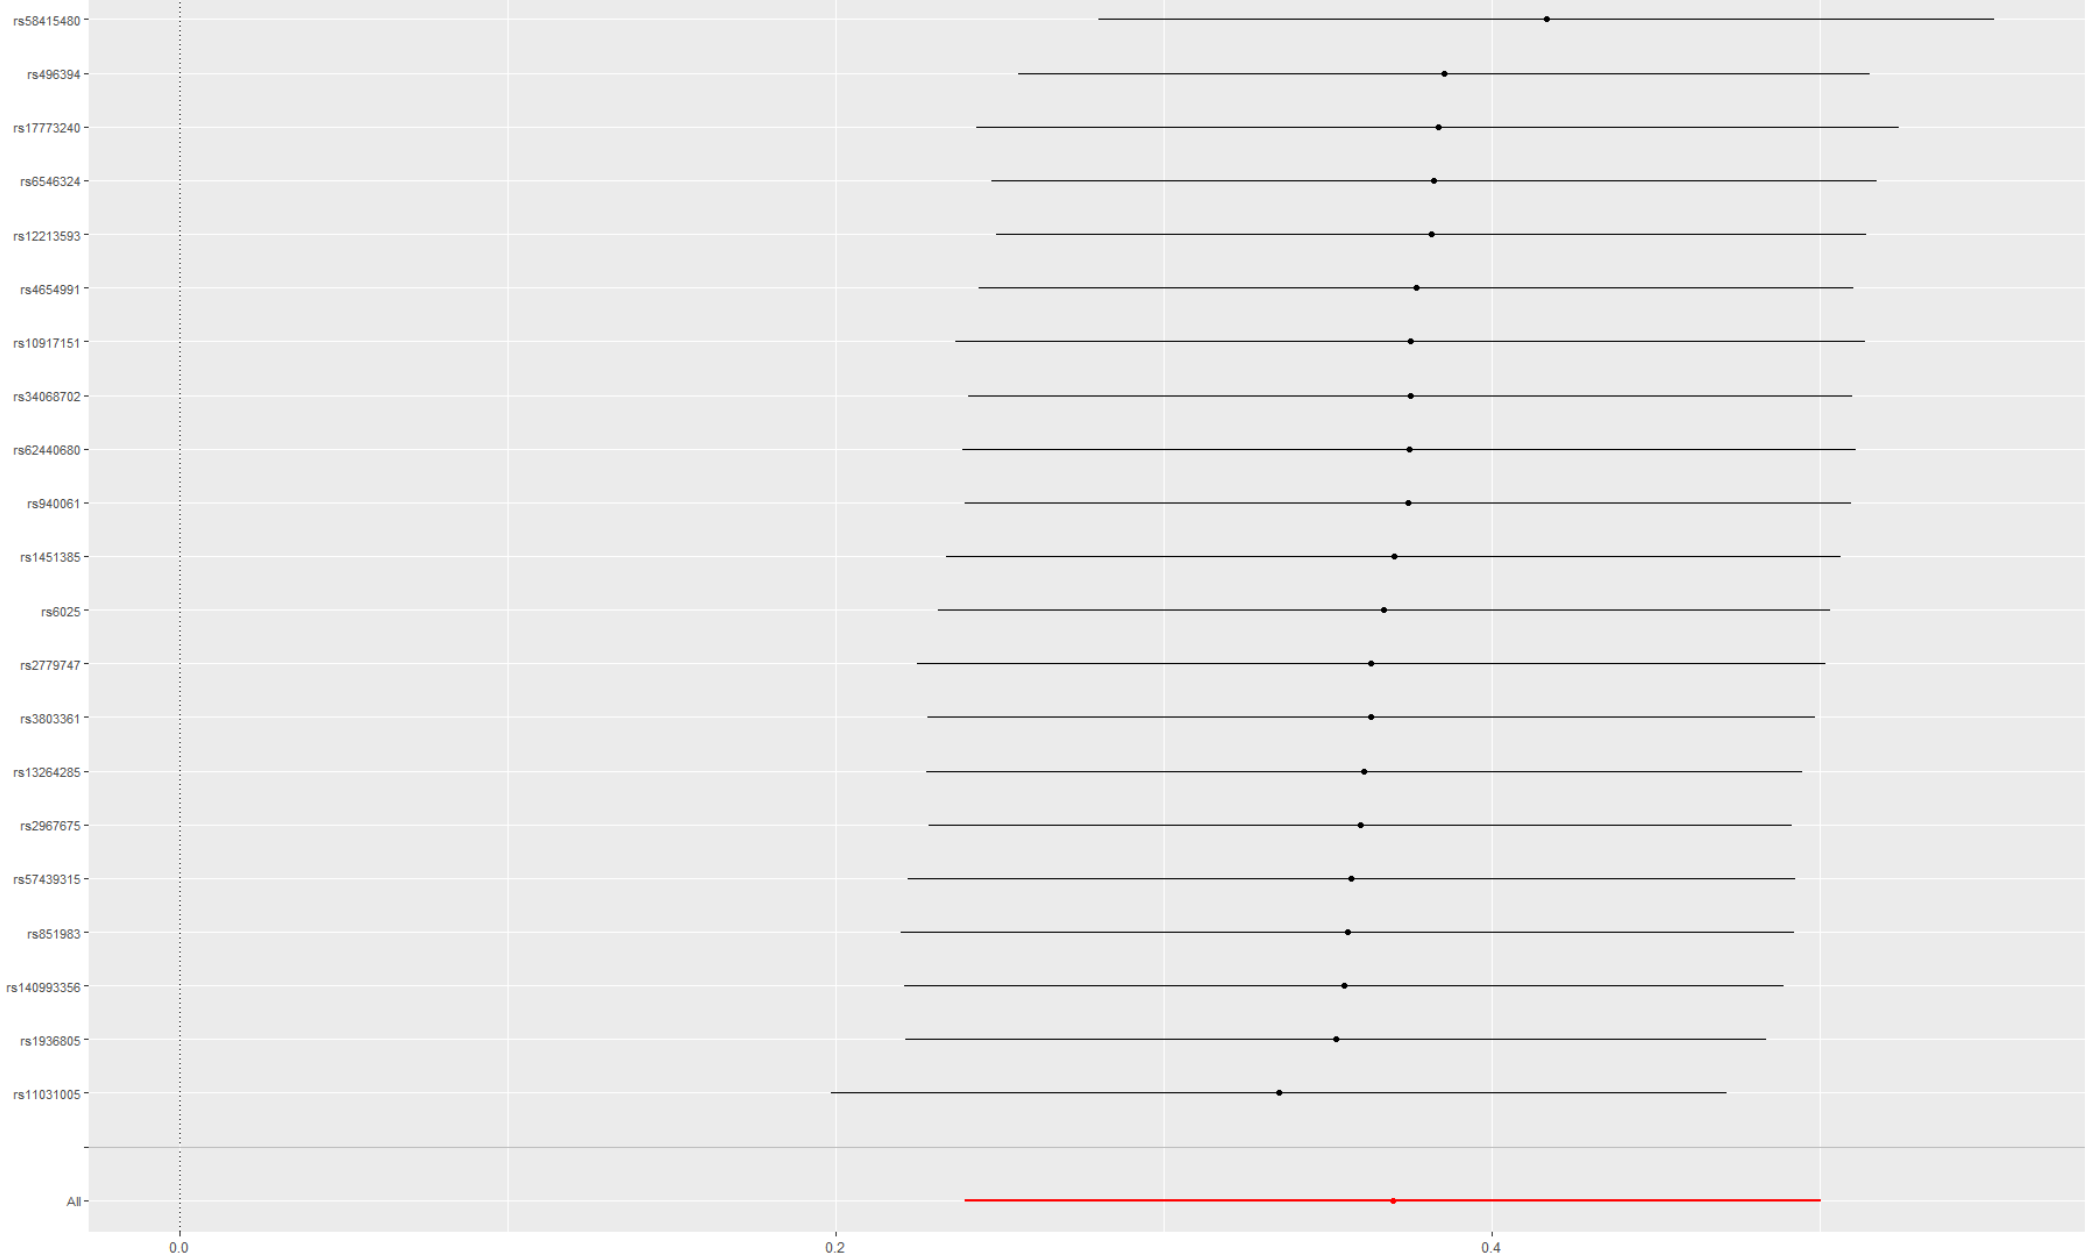

Supplementary Figure 23. Leave-one-out inverse-variance weighted mendelian randomization analyses of endometriosis on endometrioid ovarian cancer

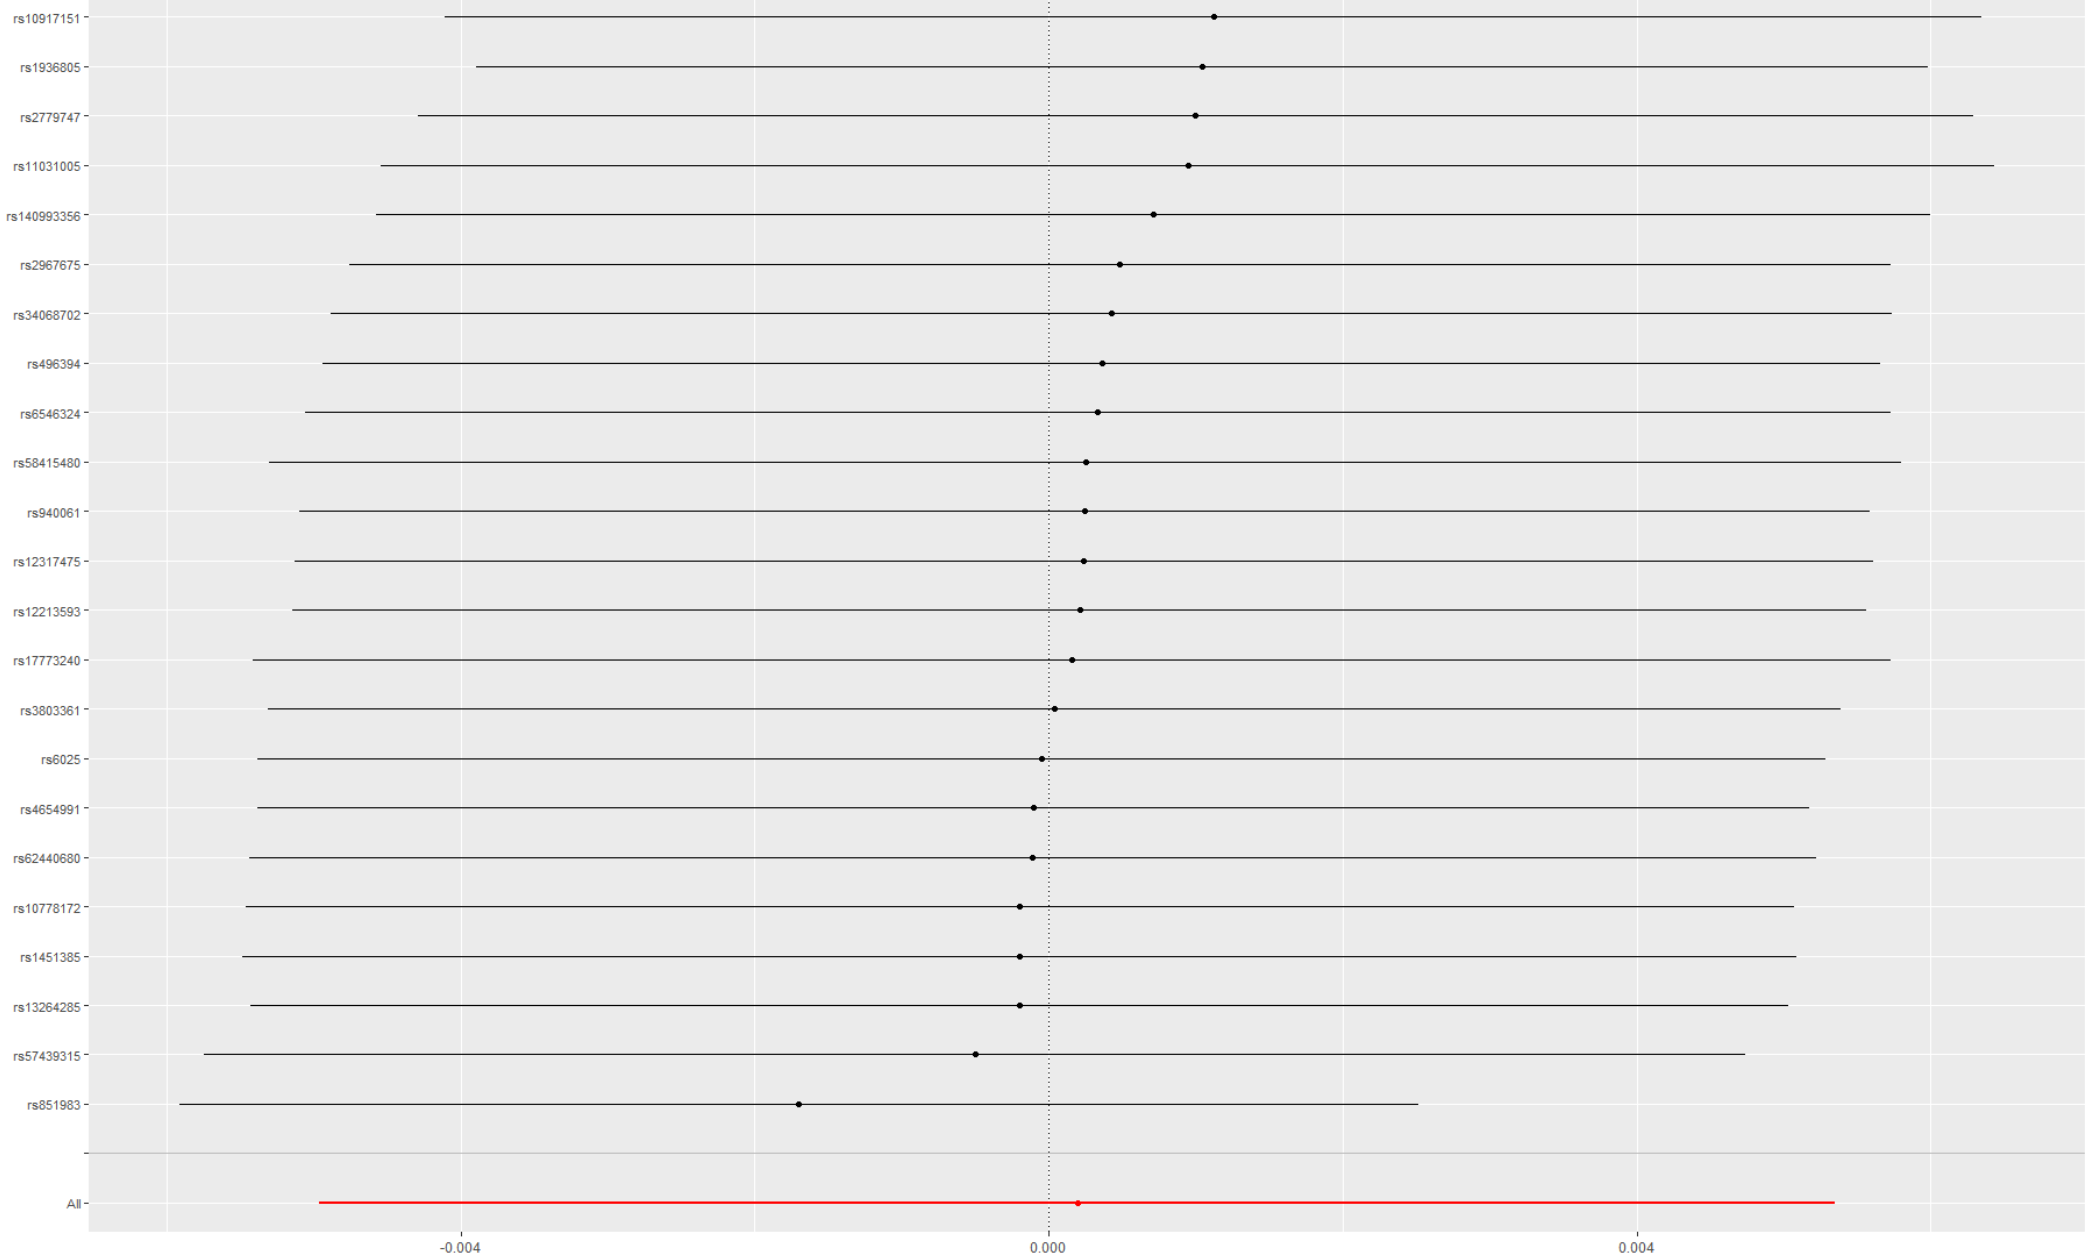

Supplementary Figure 24. Leave-one-out inverse-variance weighted mendelian randomization analyses of endometriosis on breast cancer

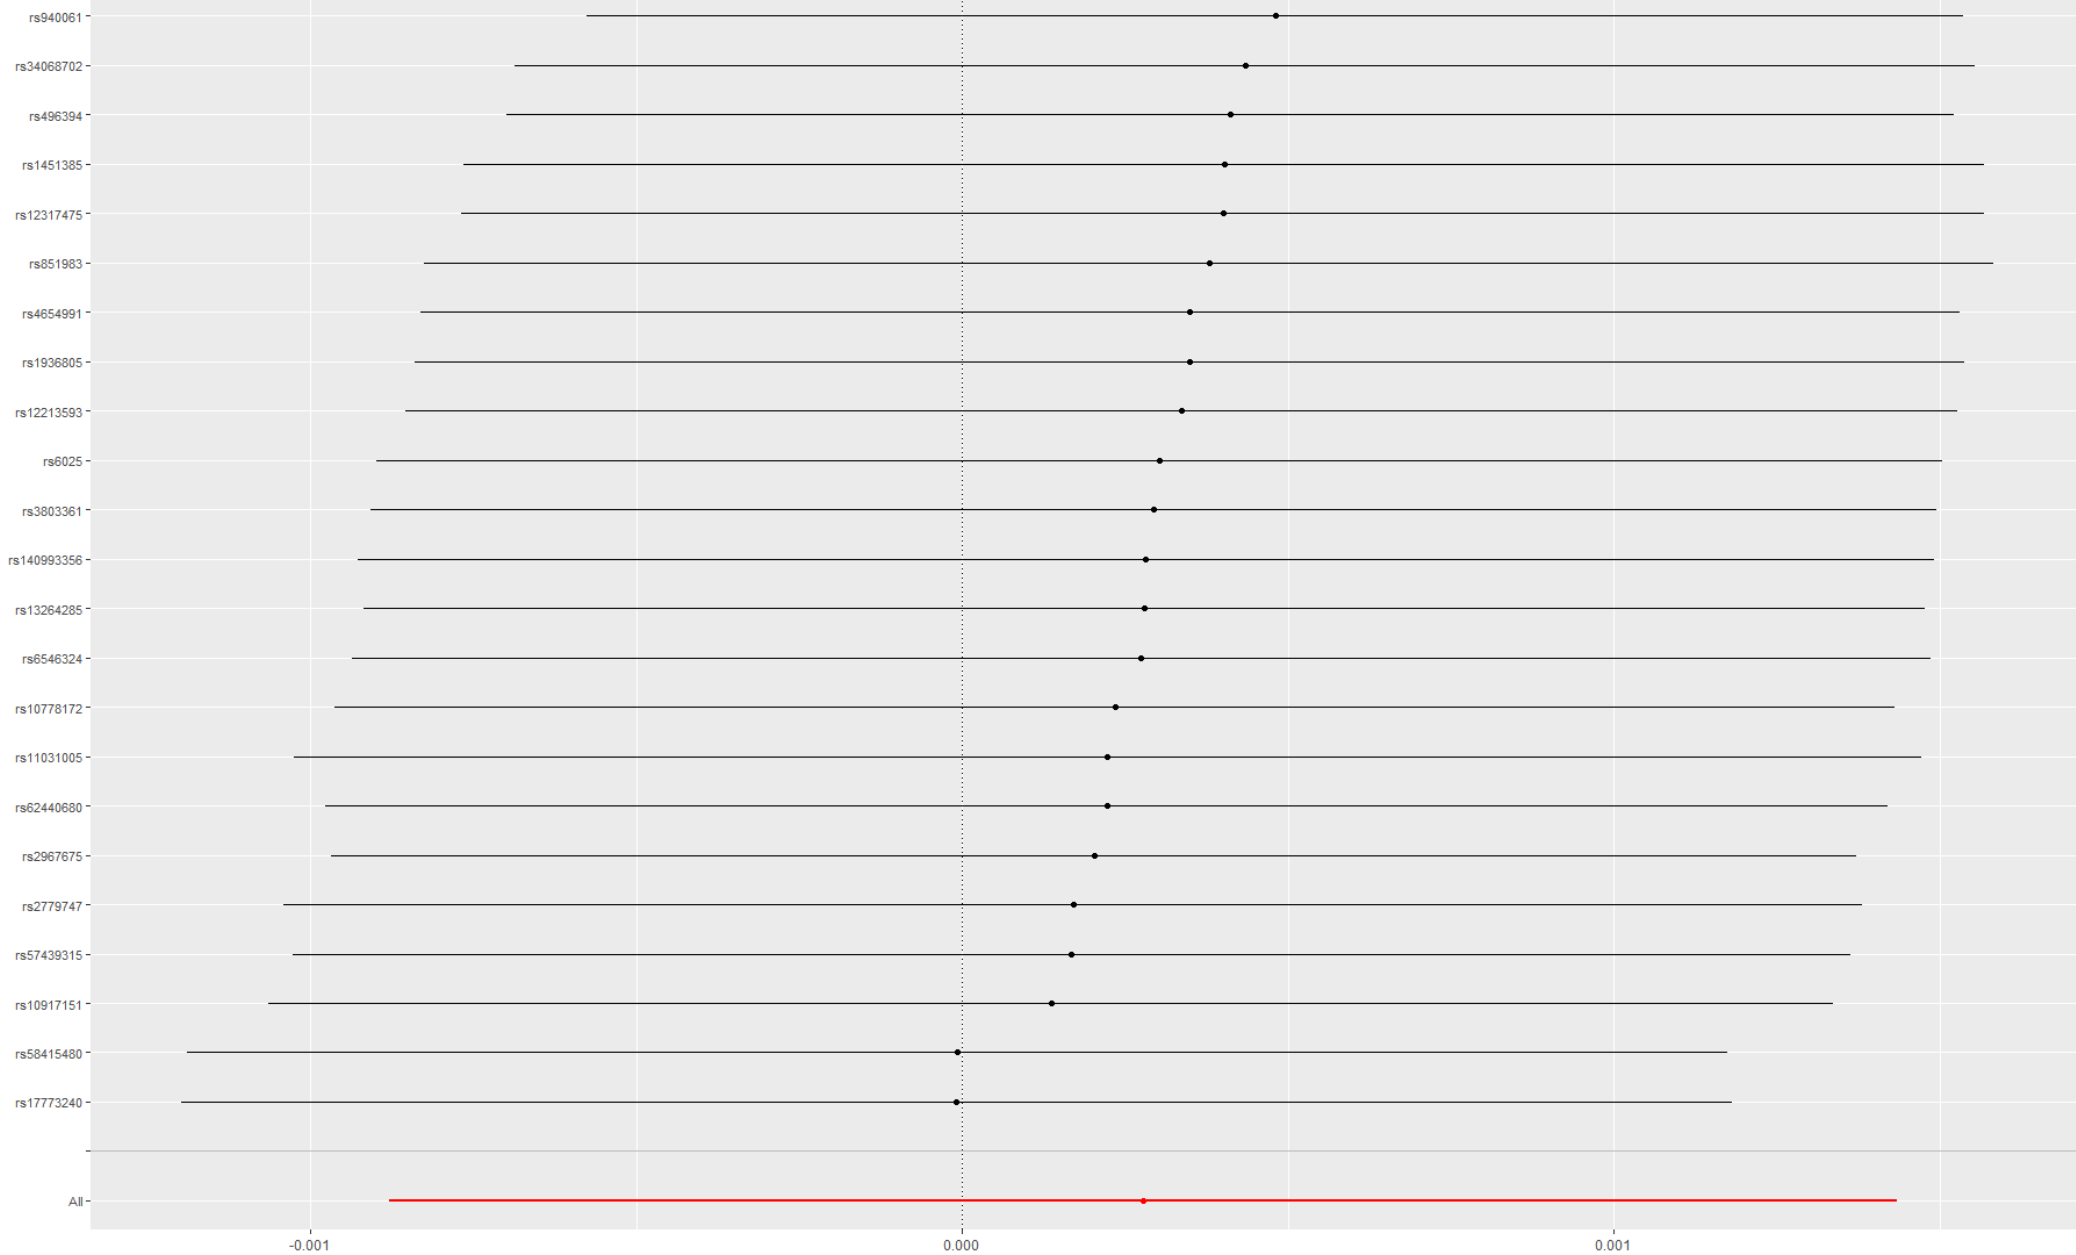

Supplementary Figure 25. Leave-one-out inverse-variance weighted mendelian randomization analyses of endometriosis on lung cancer

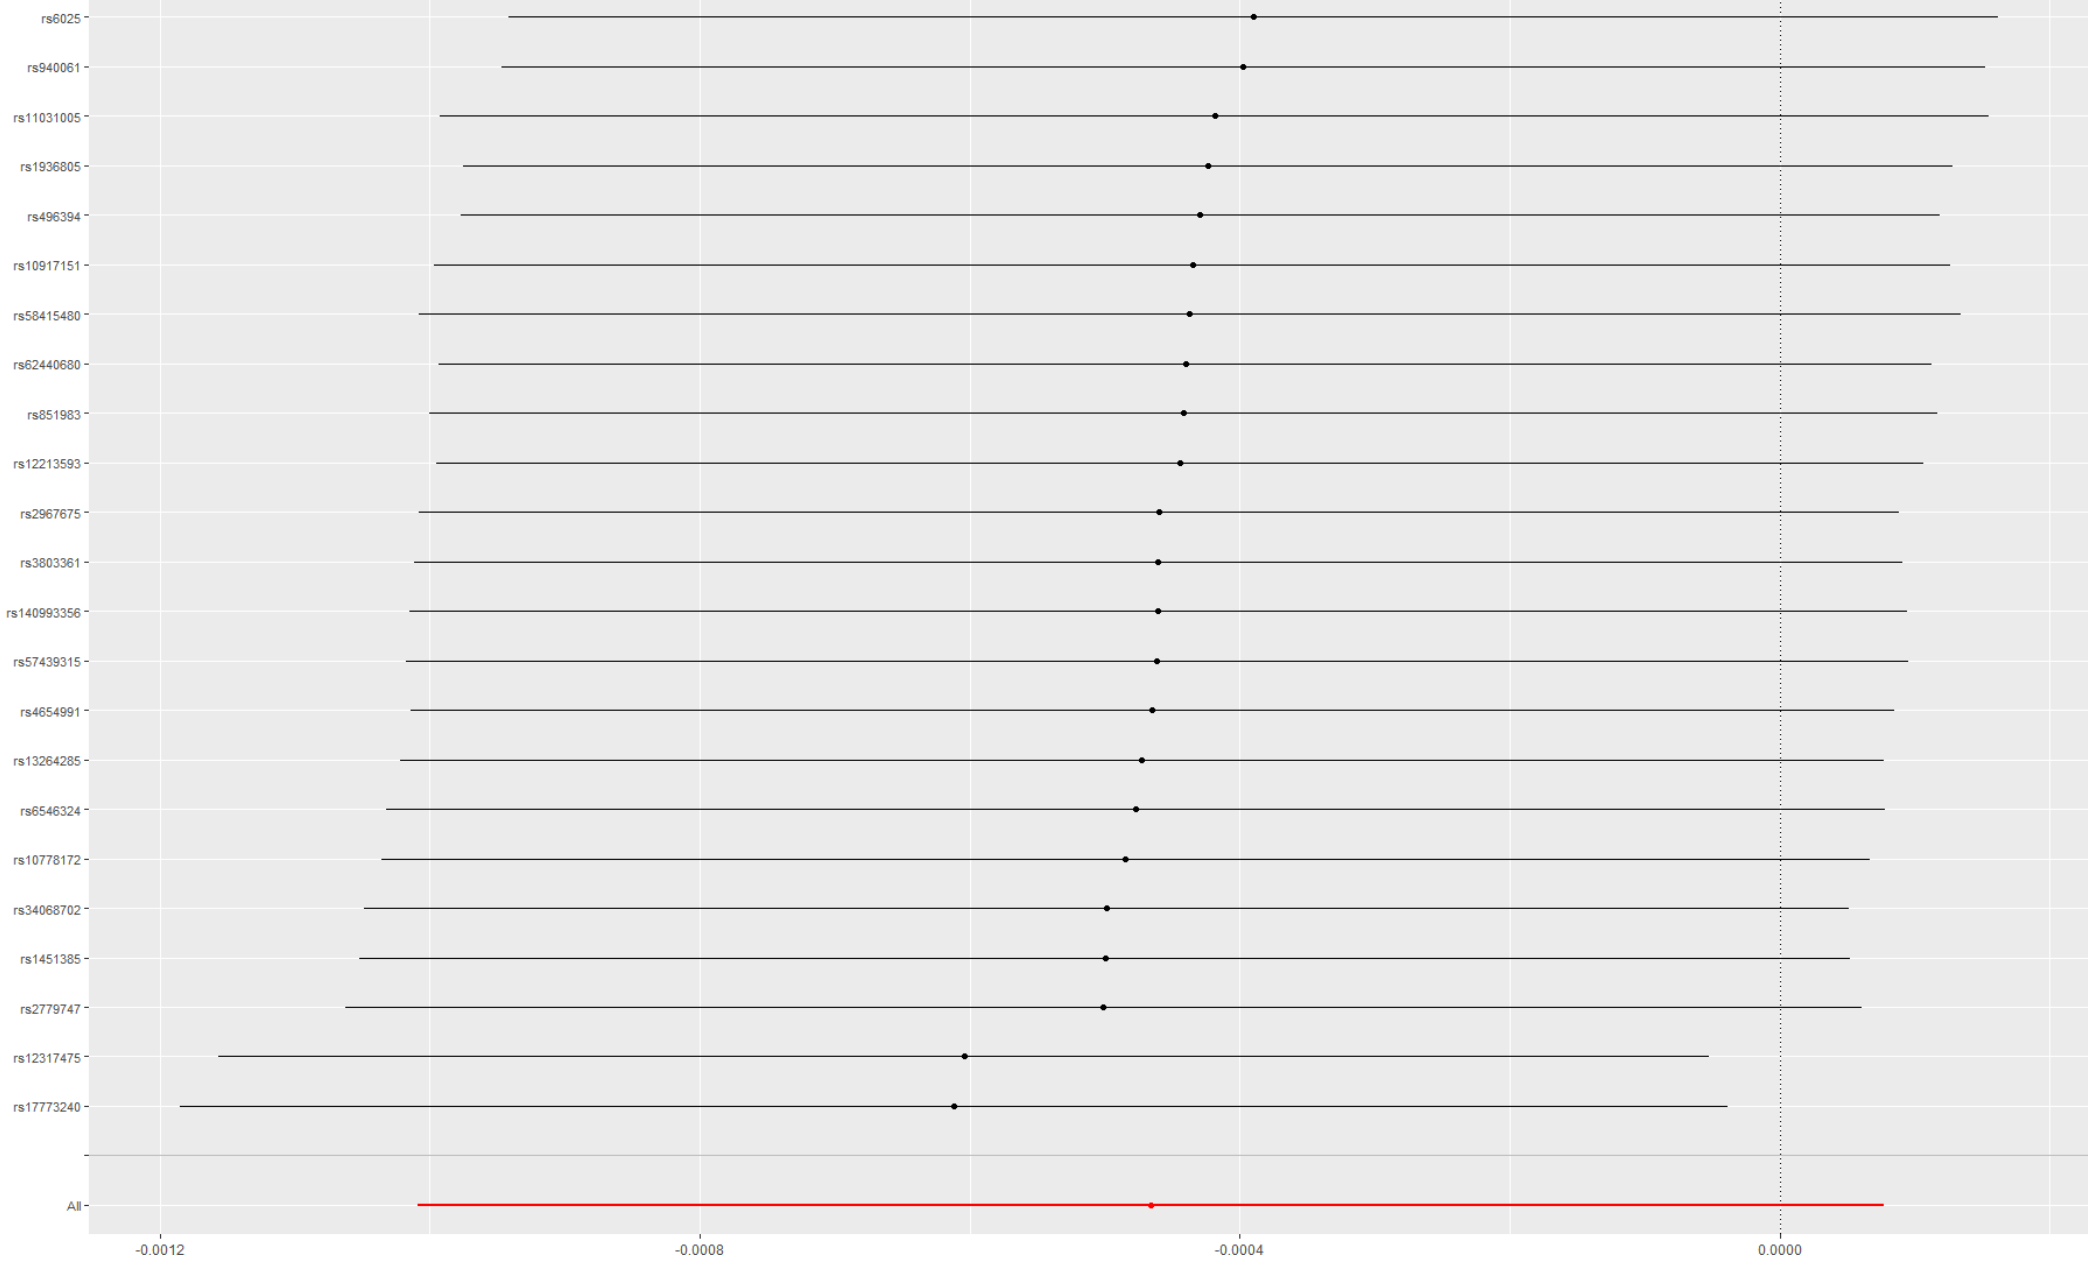

Supplementary Figure 26. Leave-one-out inverse-variance weighted mendelian randomization analyses of endometriosis on head and neck cancer

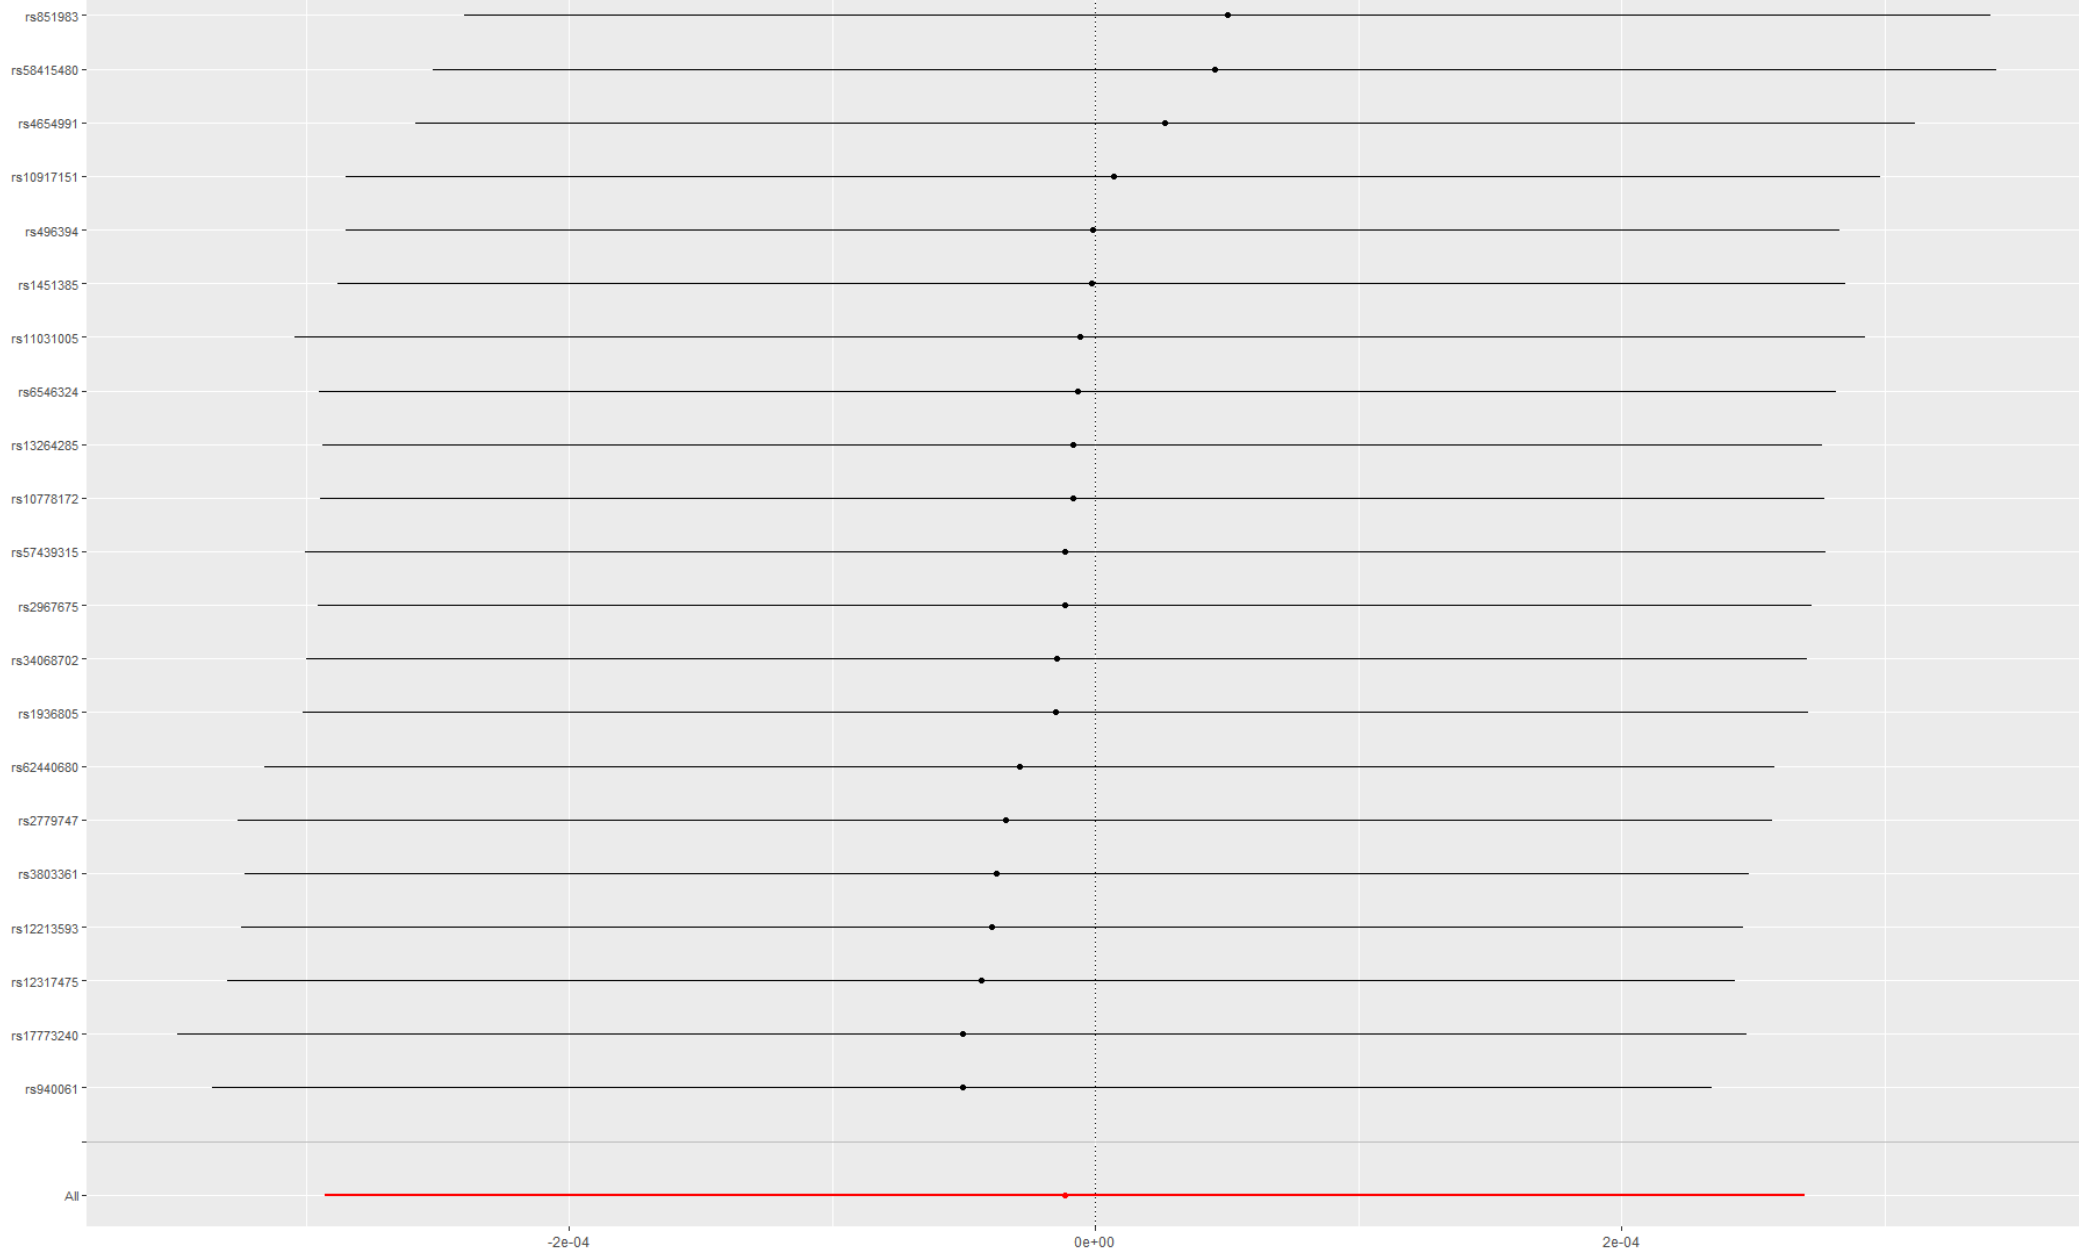

Supplementary Figure 27. Leave-one-out inverse-variance weighted mendelian randomization analyses of endometriosis on laryngeal cancer

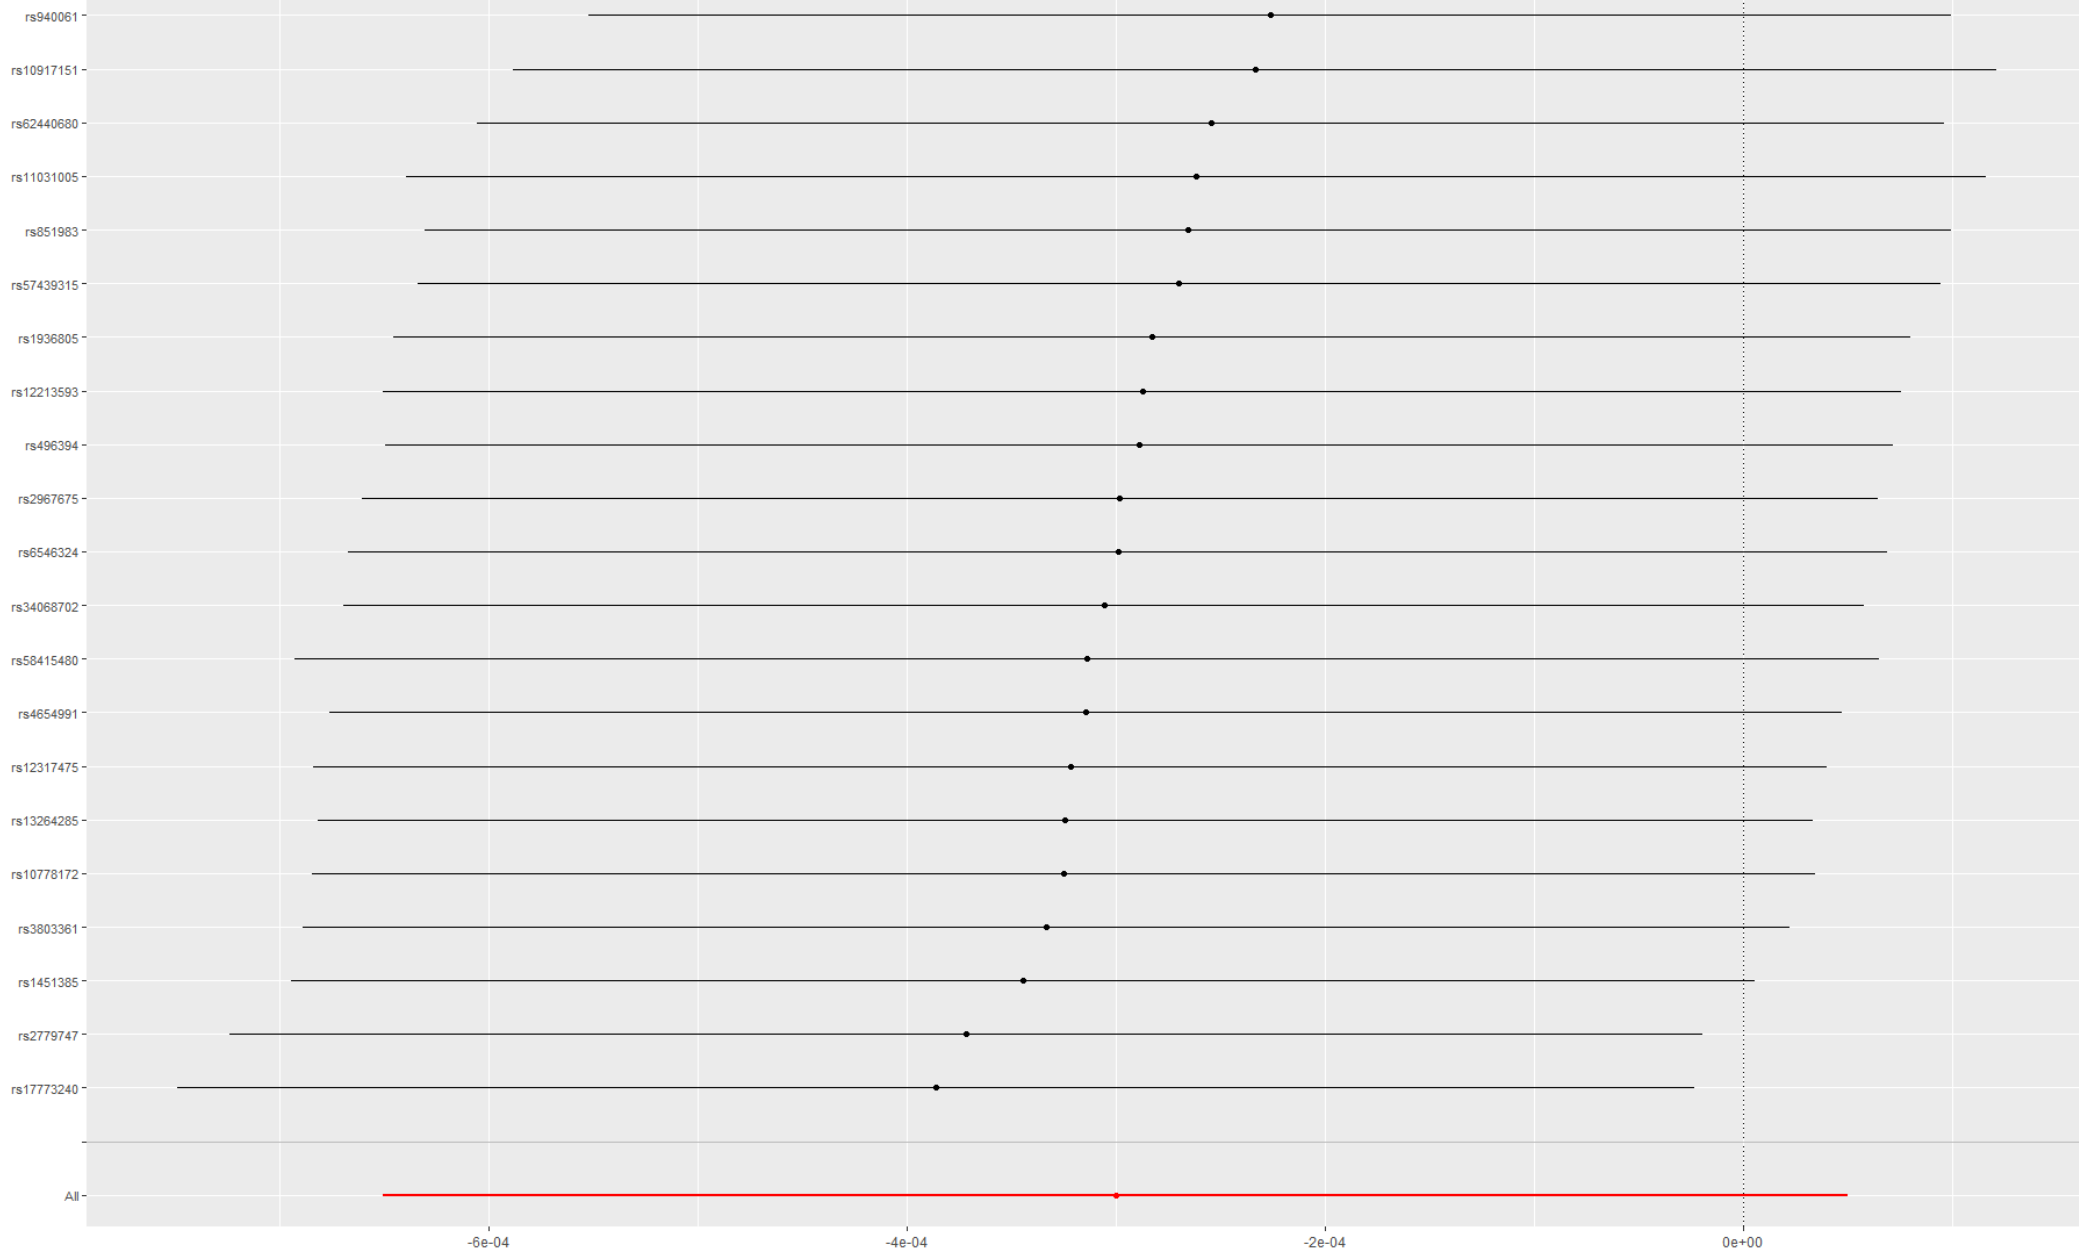

Supplementary Figure 28. Leave-one-out inverse-variance weighted mendelian randomization analyses of endometriosis on oral cavity cancer

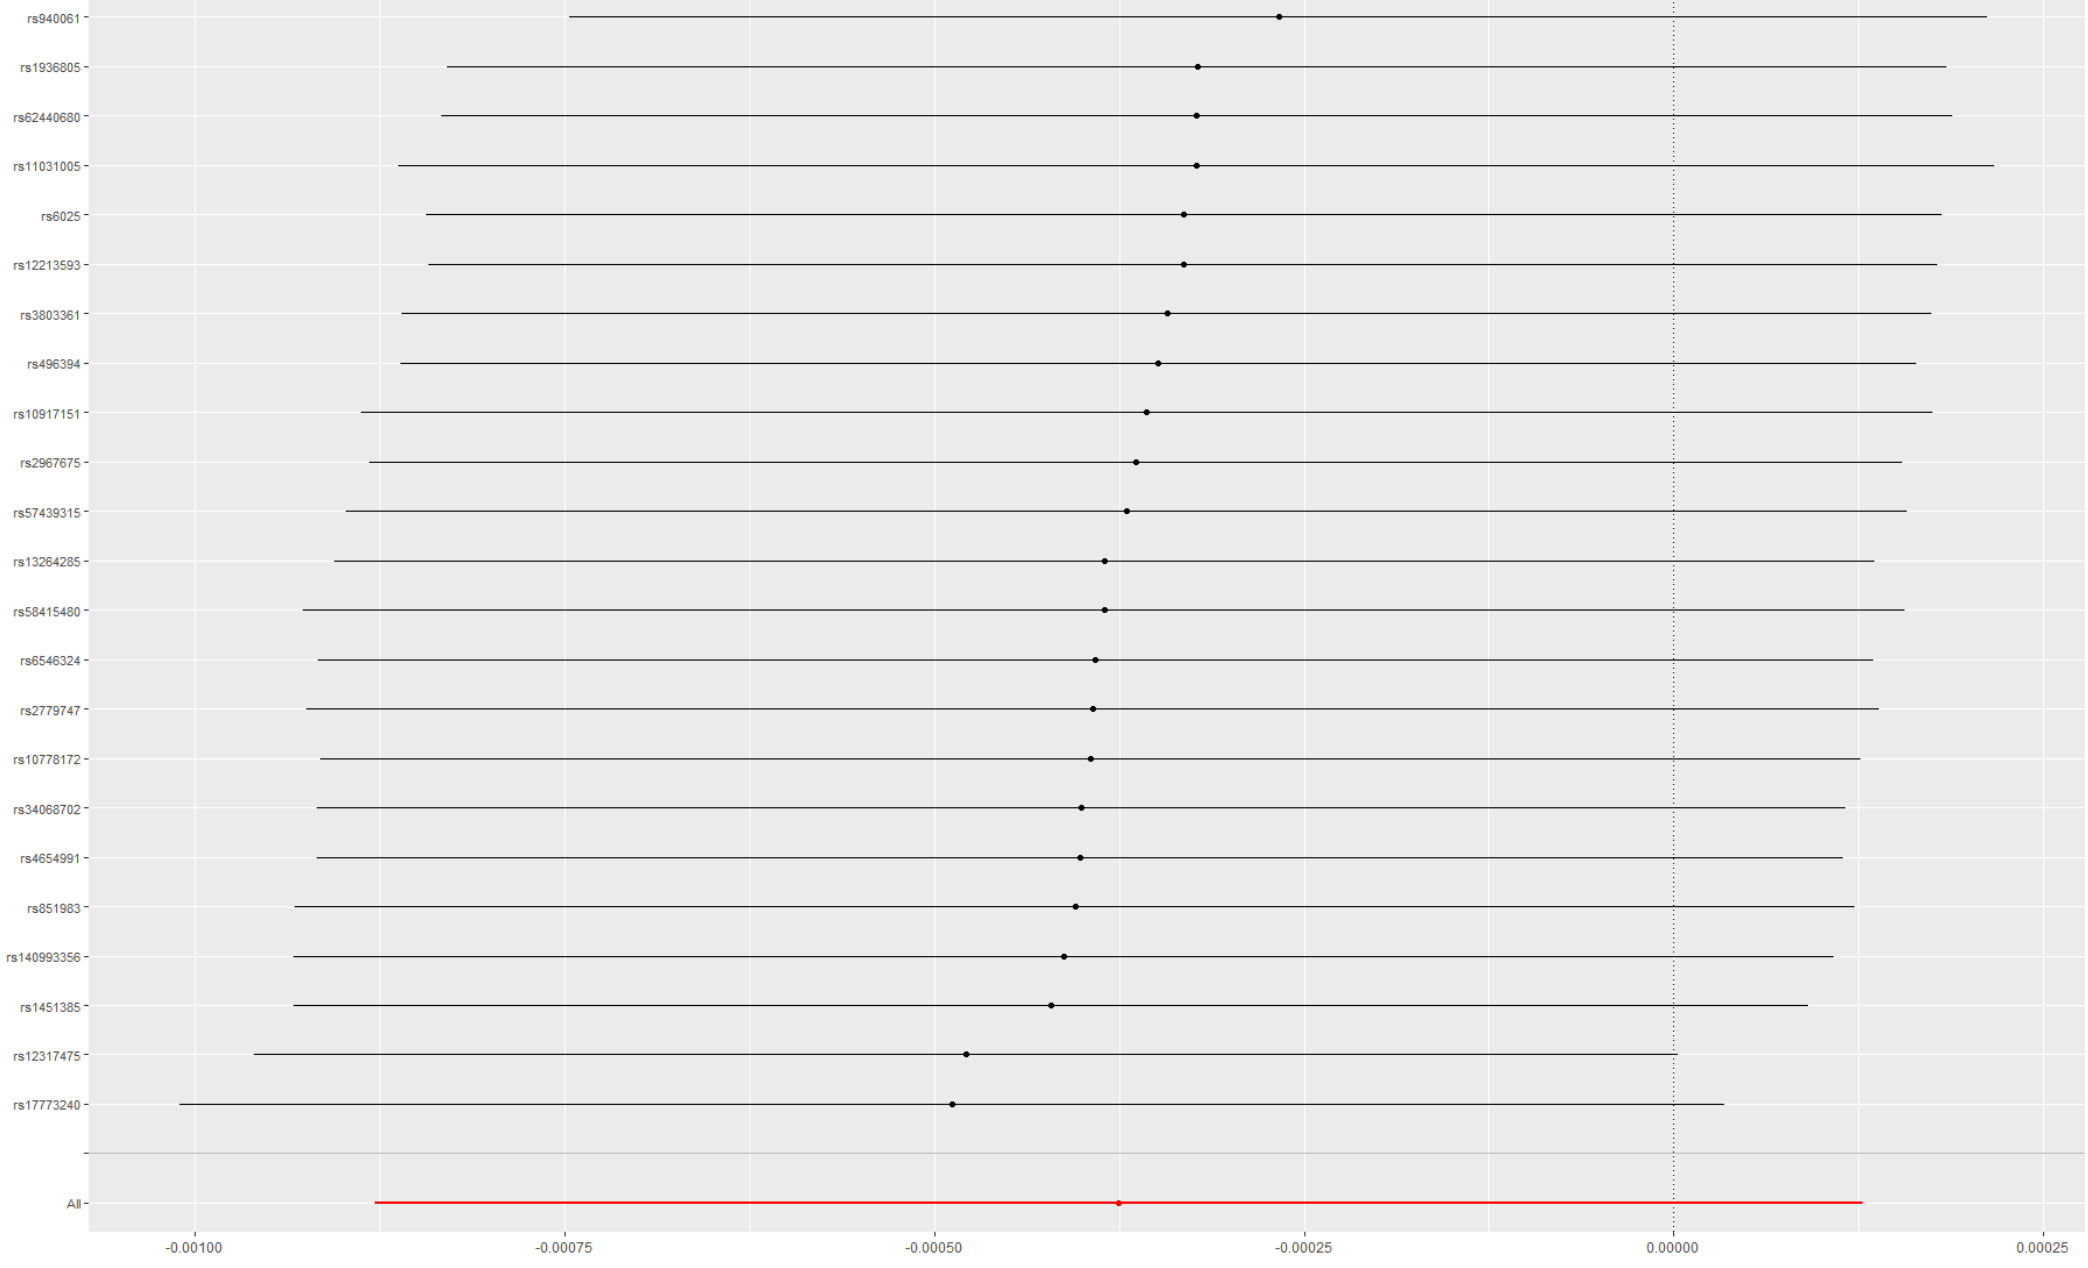

Supplementary Figure 29. Leave-one-out inverse-variance weighted mendelian randomization analyses of endometriosis on oral and oropharyngeal cancer



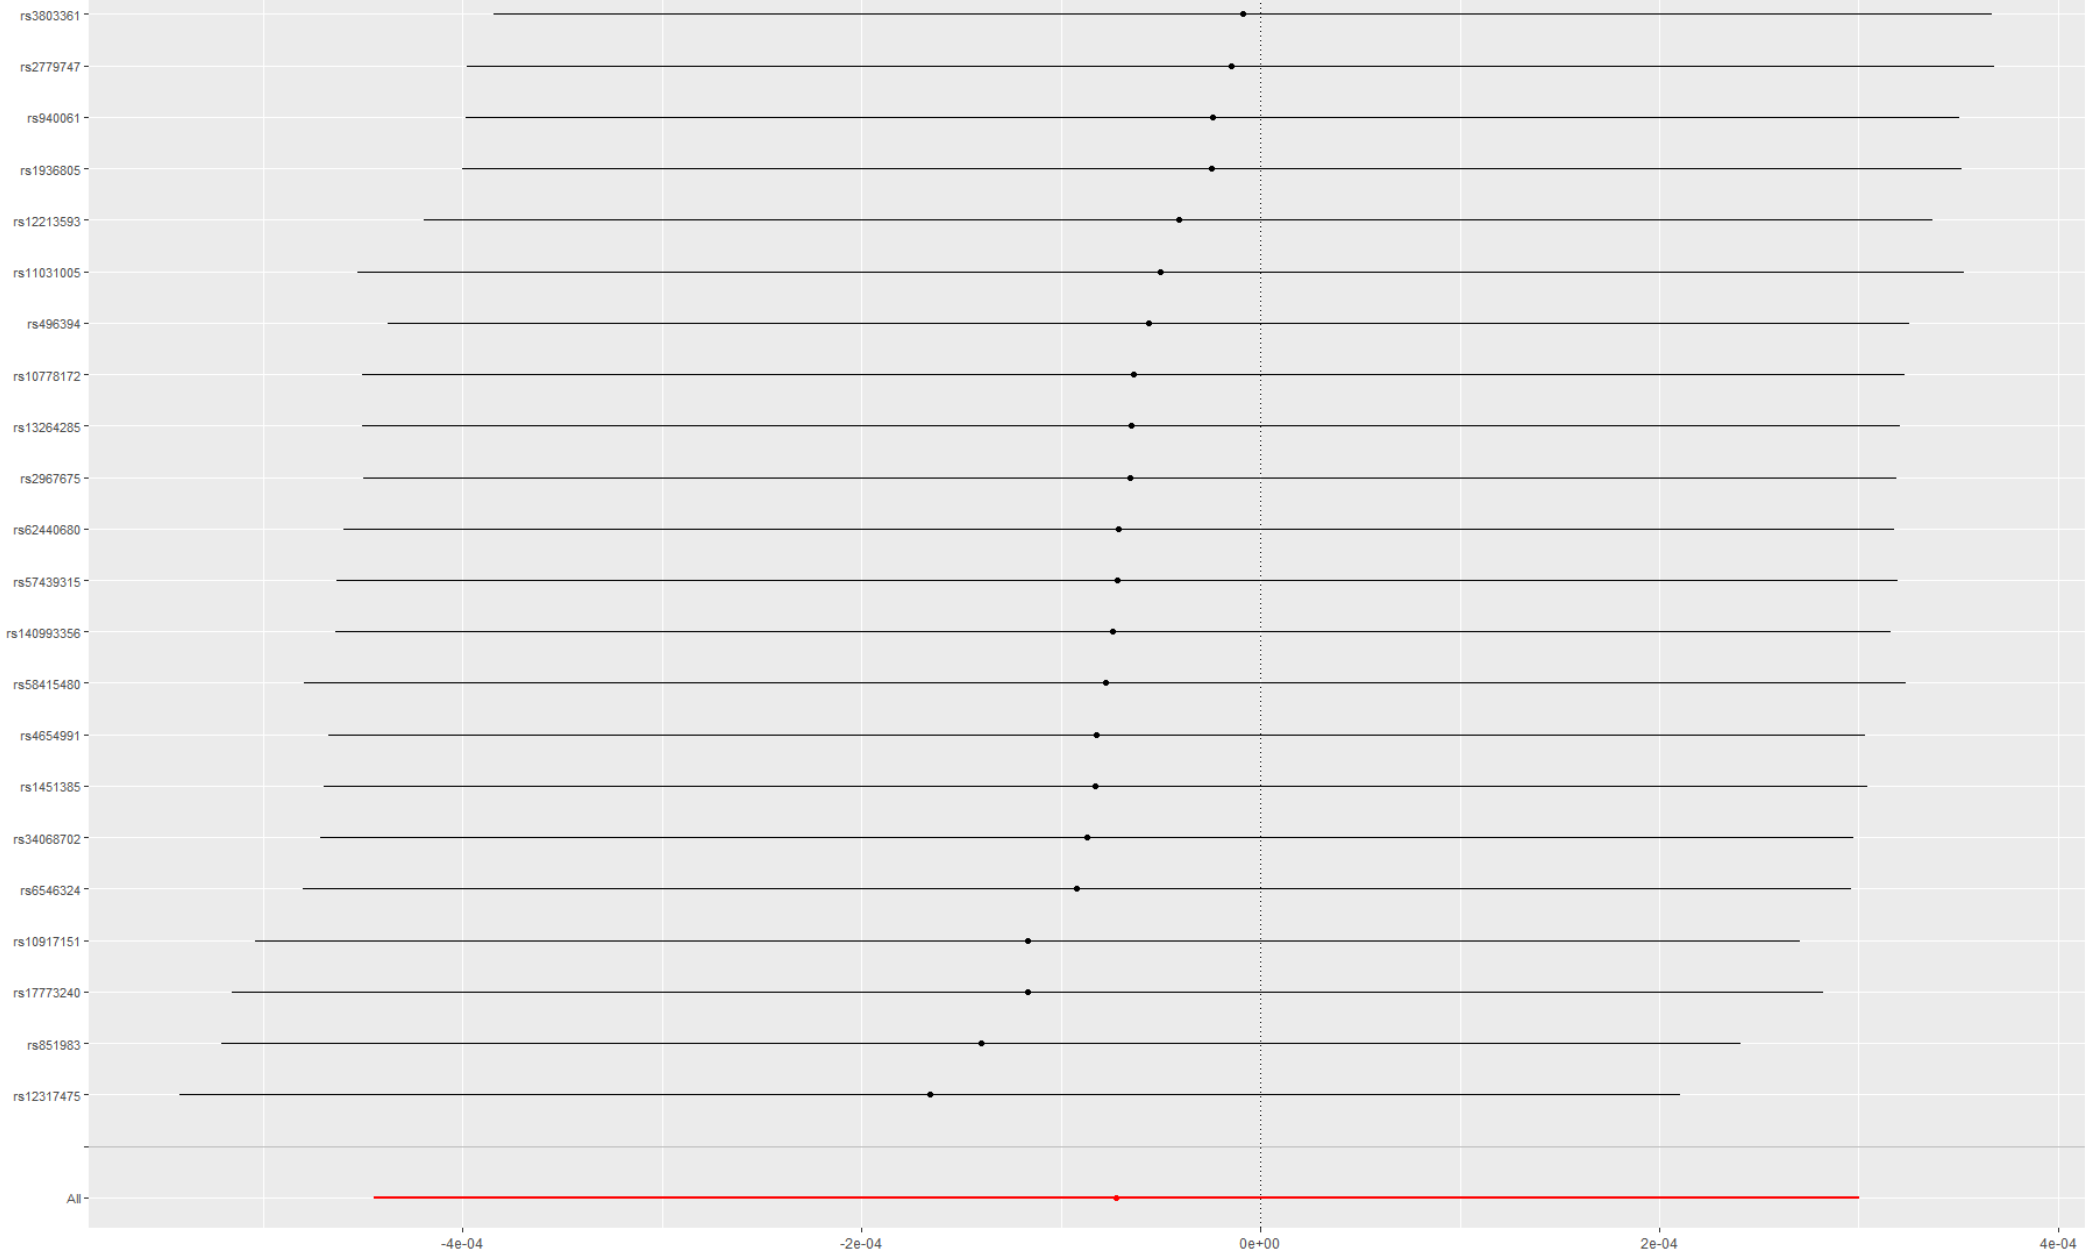

Supplementary Figure 30. Leave-one-out inverse-variance weighted mendelian randomization analyses of endometriosis on oropharyngeal cancer

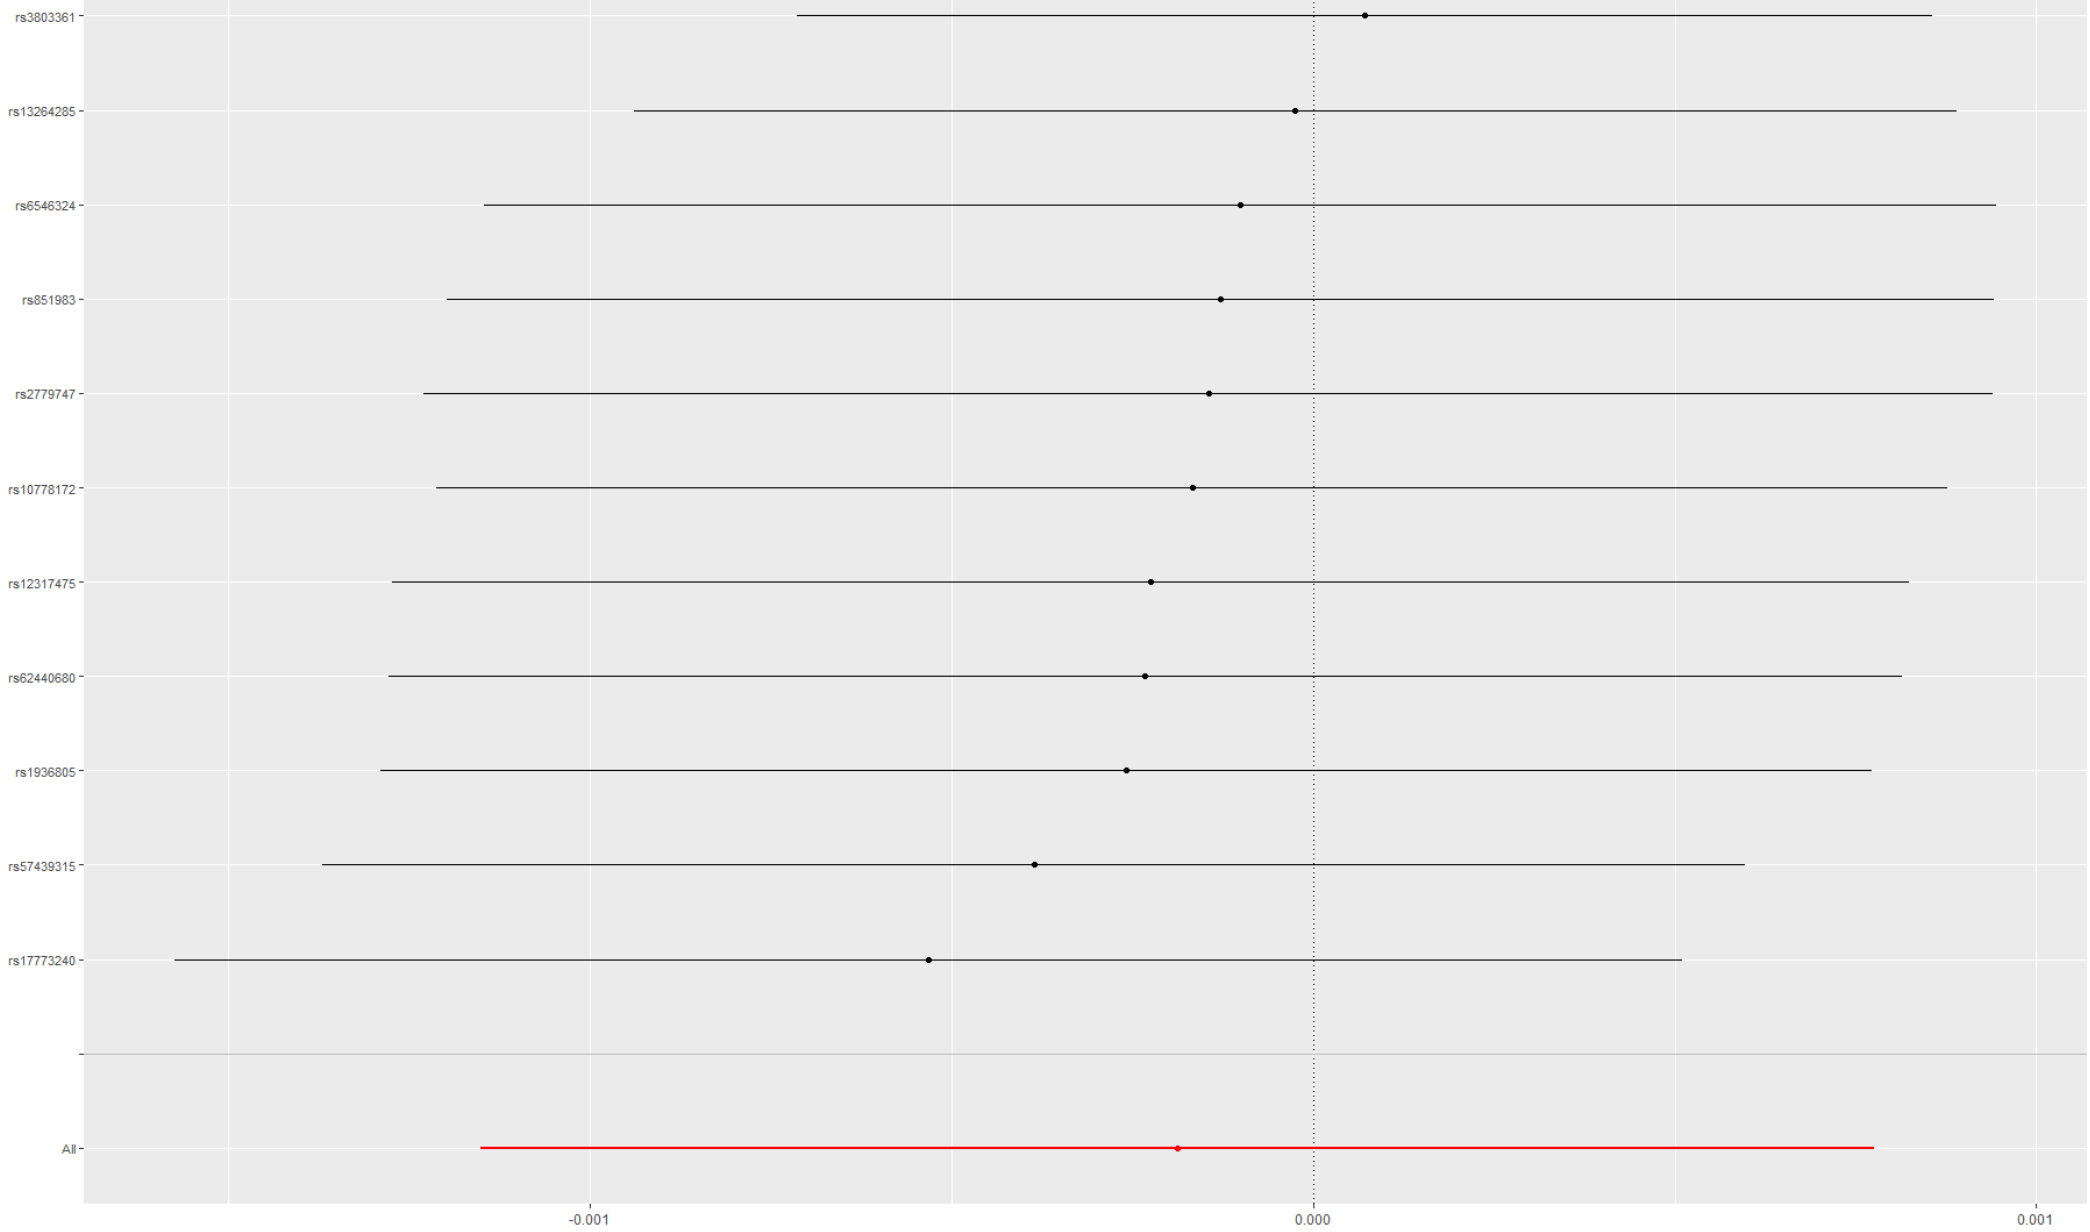

Supplementary Figure 31. Leave-one-out inverse-variance weighted mendelian randomization analyses of endometriosis on endometrial cancer

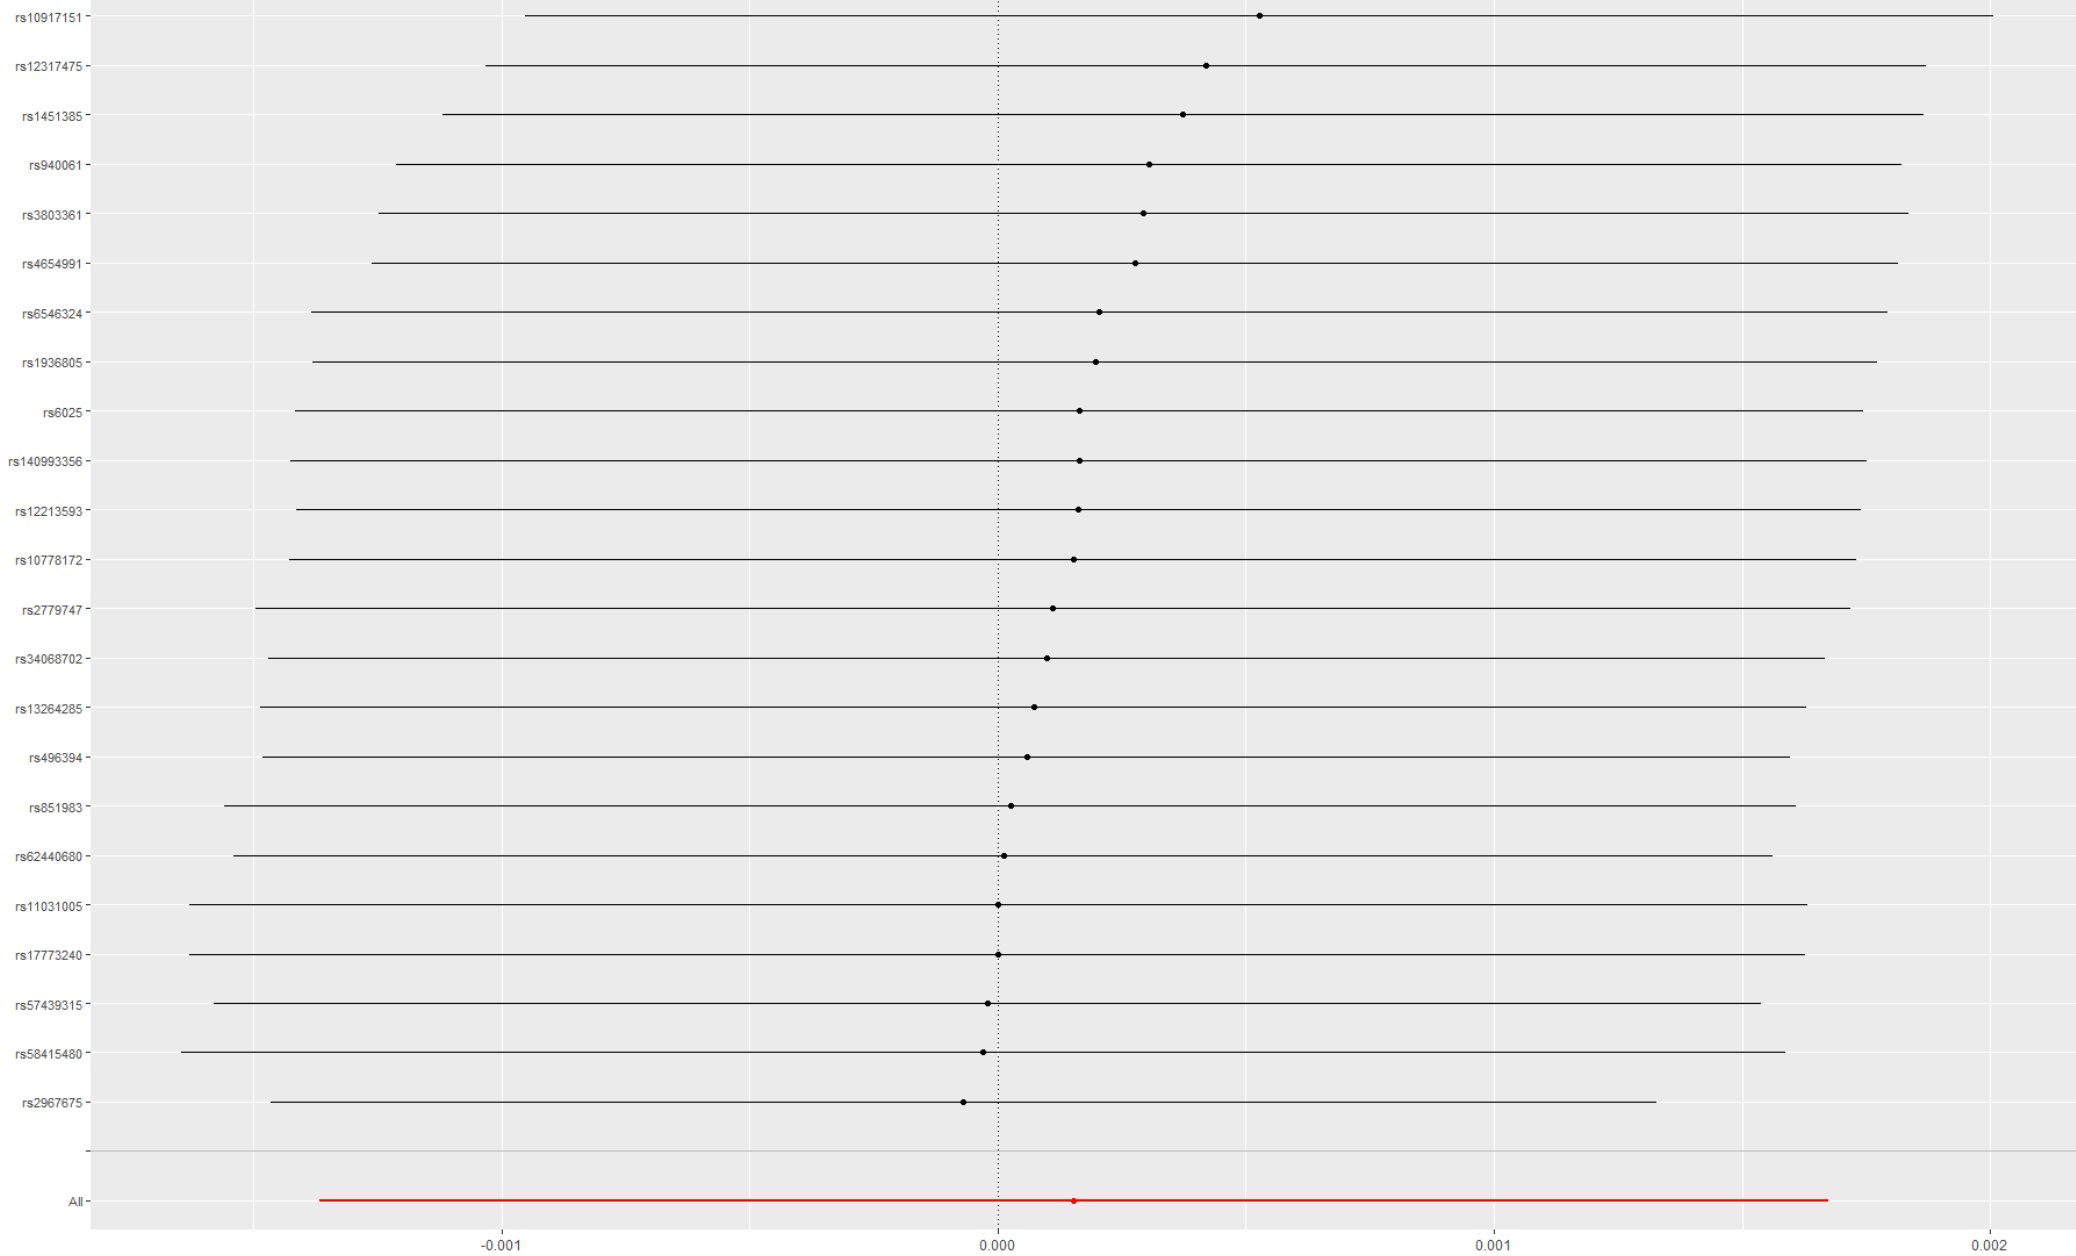

Supplementary Figure 32. Leave-one-out inverse-variance weighted mendelian randomization analyses of endometriosis on colorectal cancer

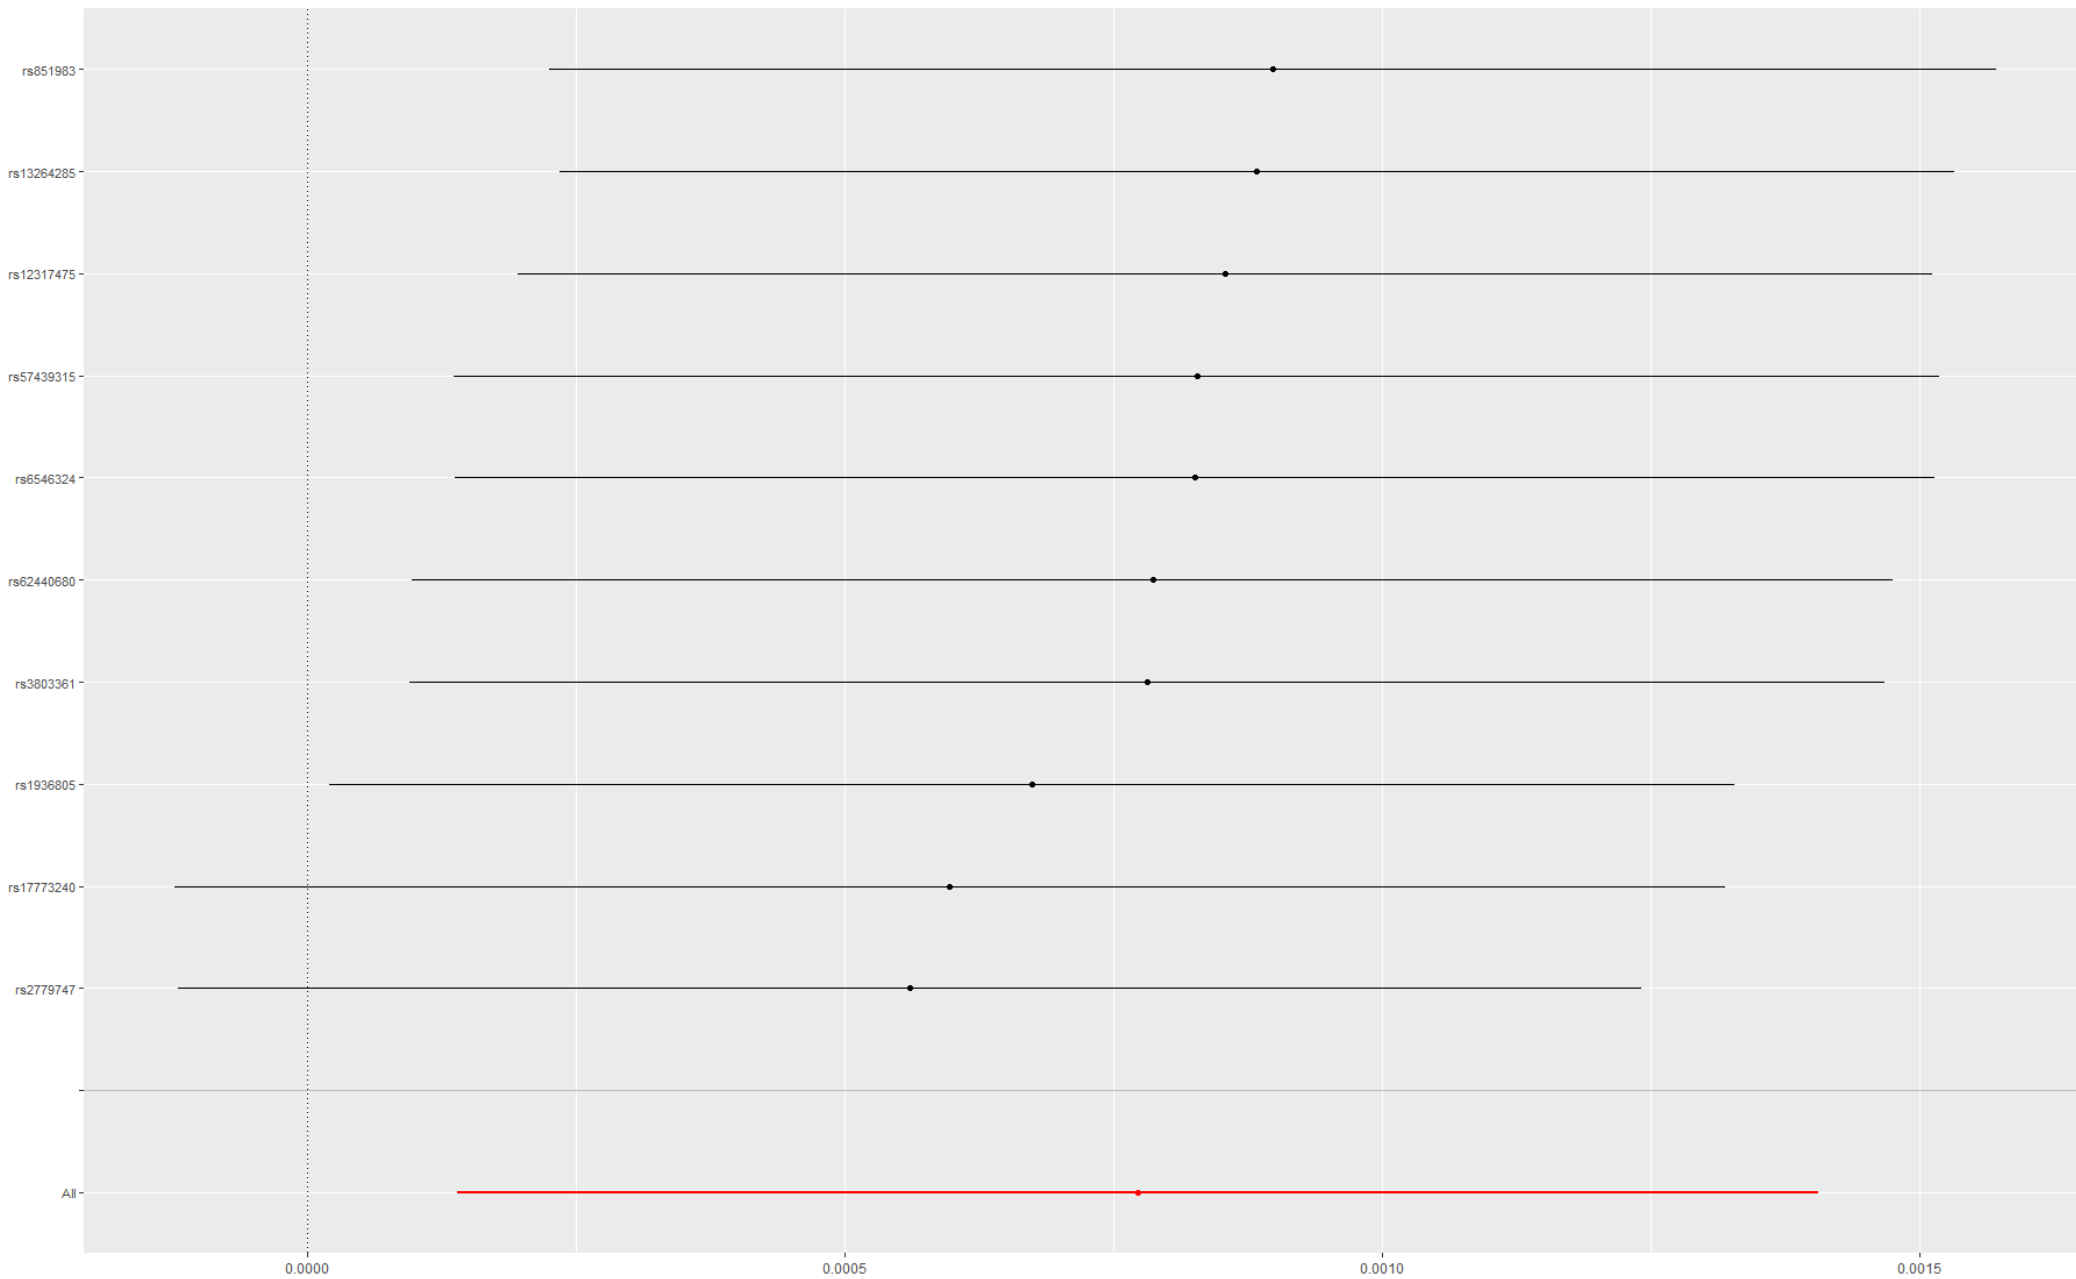

Supplementary Figure 33. Leave-one-out inverse-variance weighted mendelian randomization analyses of endometriosis on bladder cancer

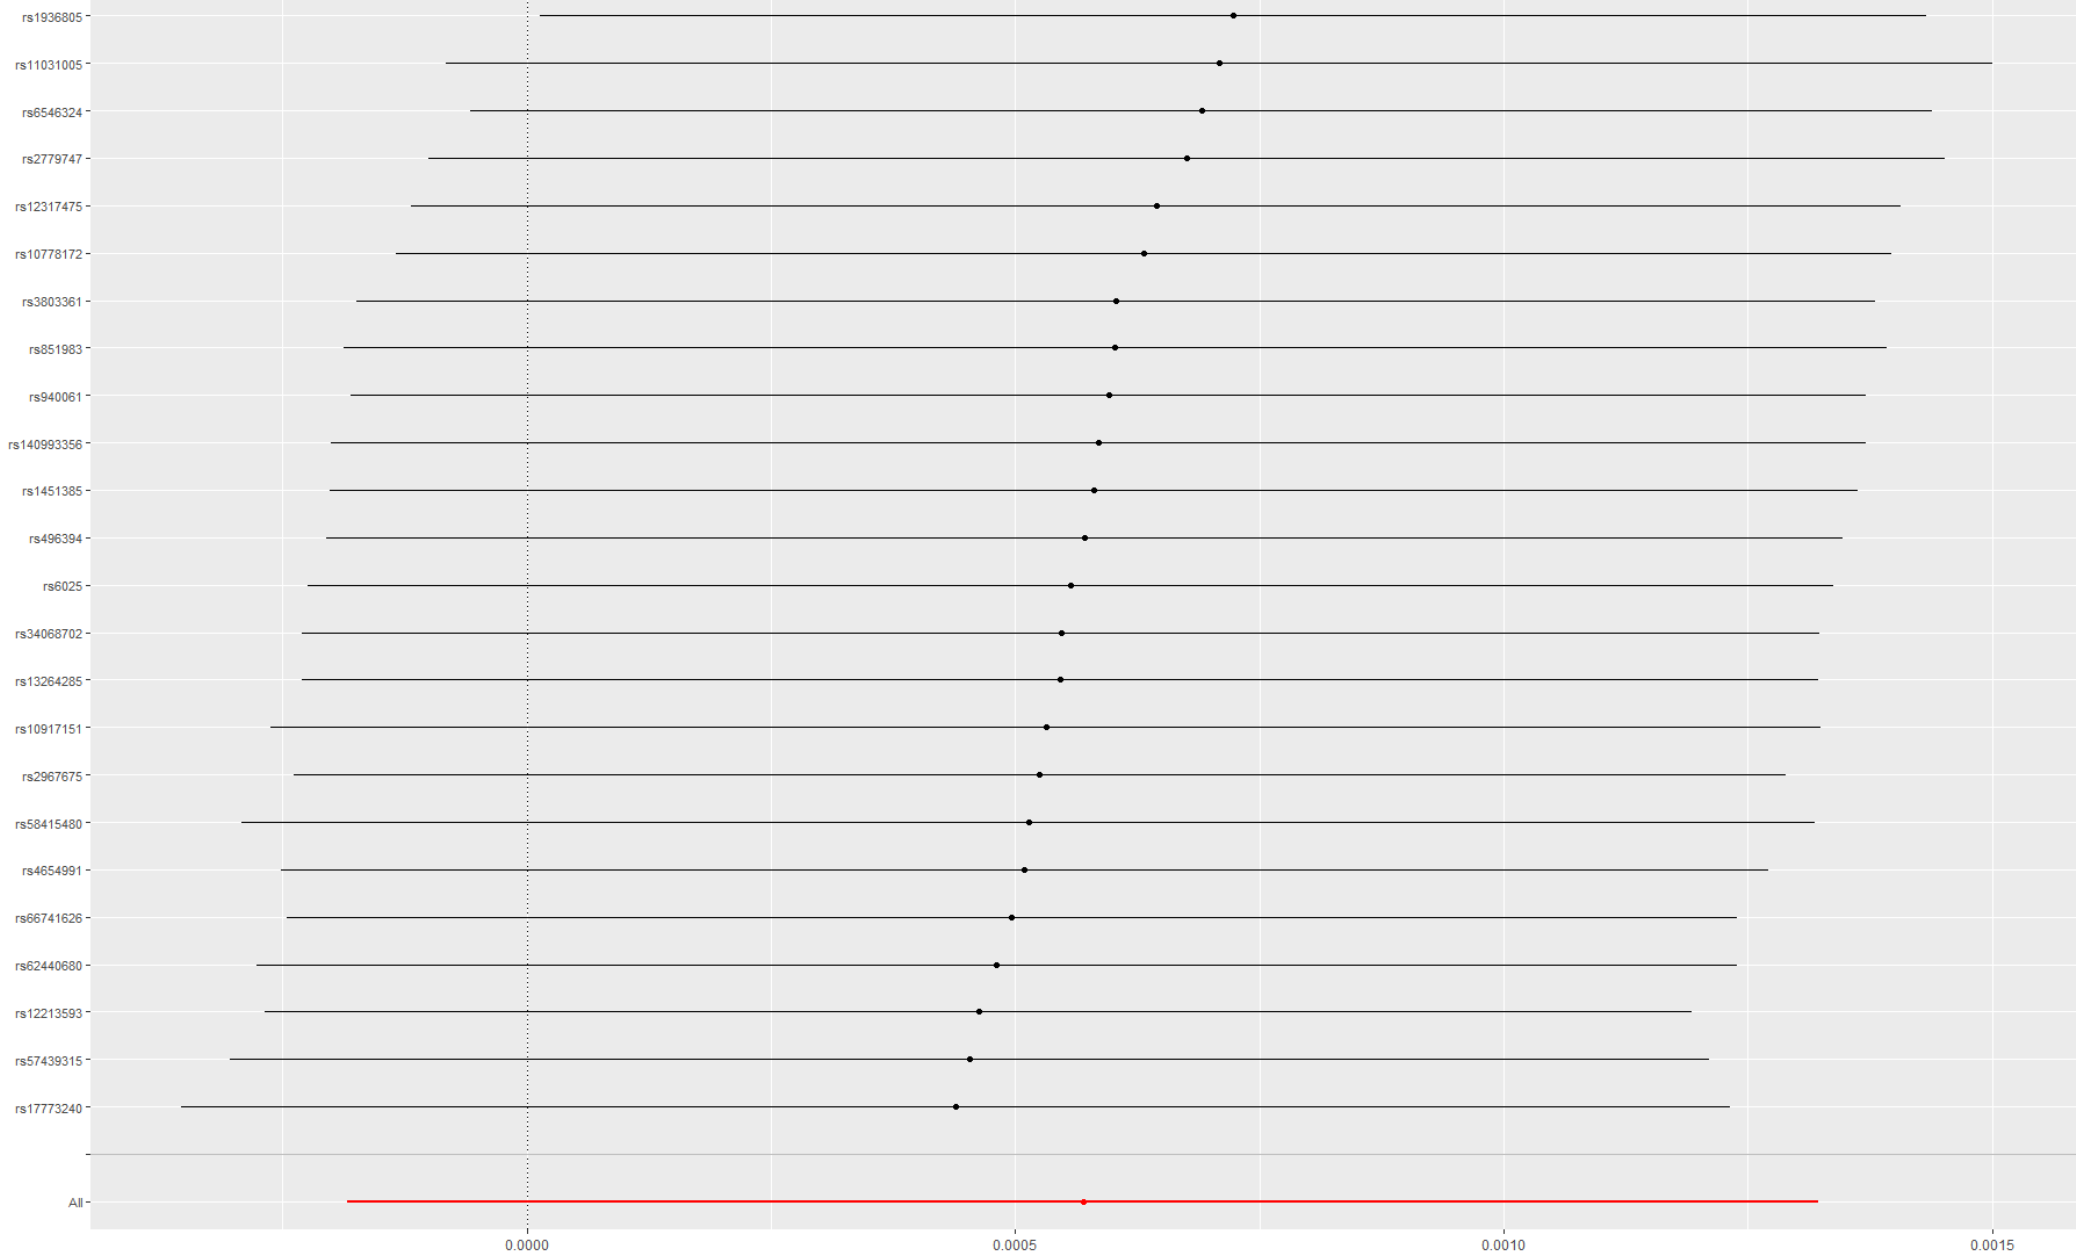

Supplementary Figure 34. Leave-one-out inverse-variance weighted mendelian randomization analyses of endometriosis on lymphoma

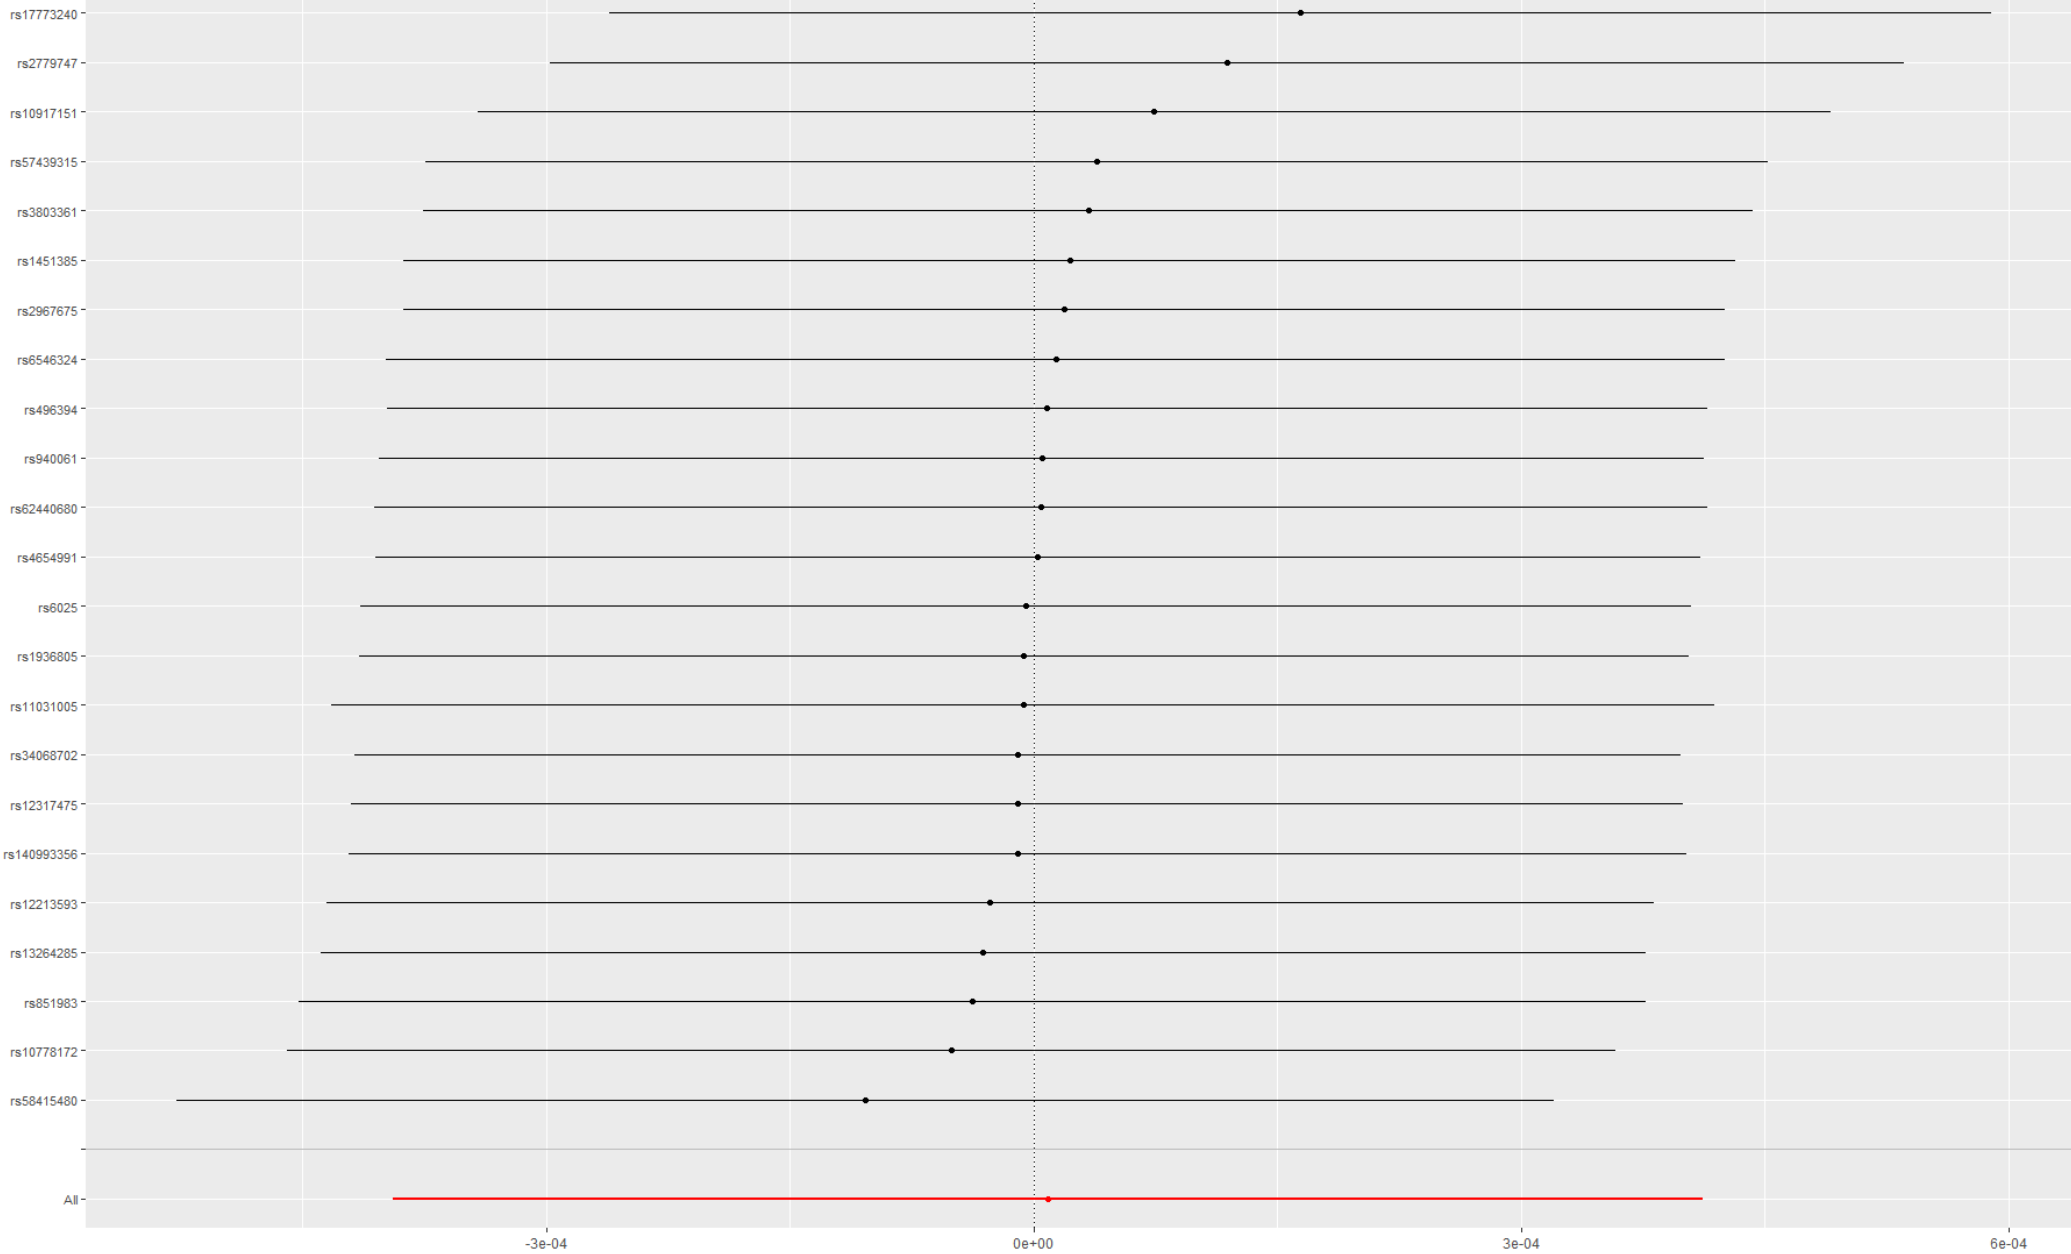

Supplementary Figure 35. Leave-one-out inverse-variance weighted mendelian randomization analyses of endometriosis on brain cancer

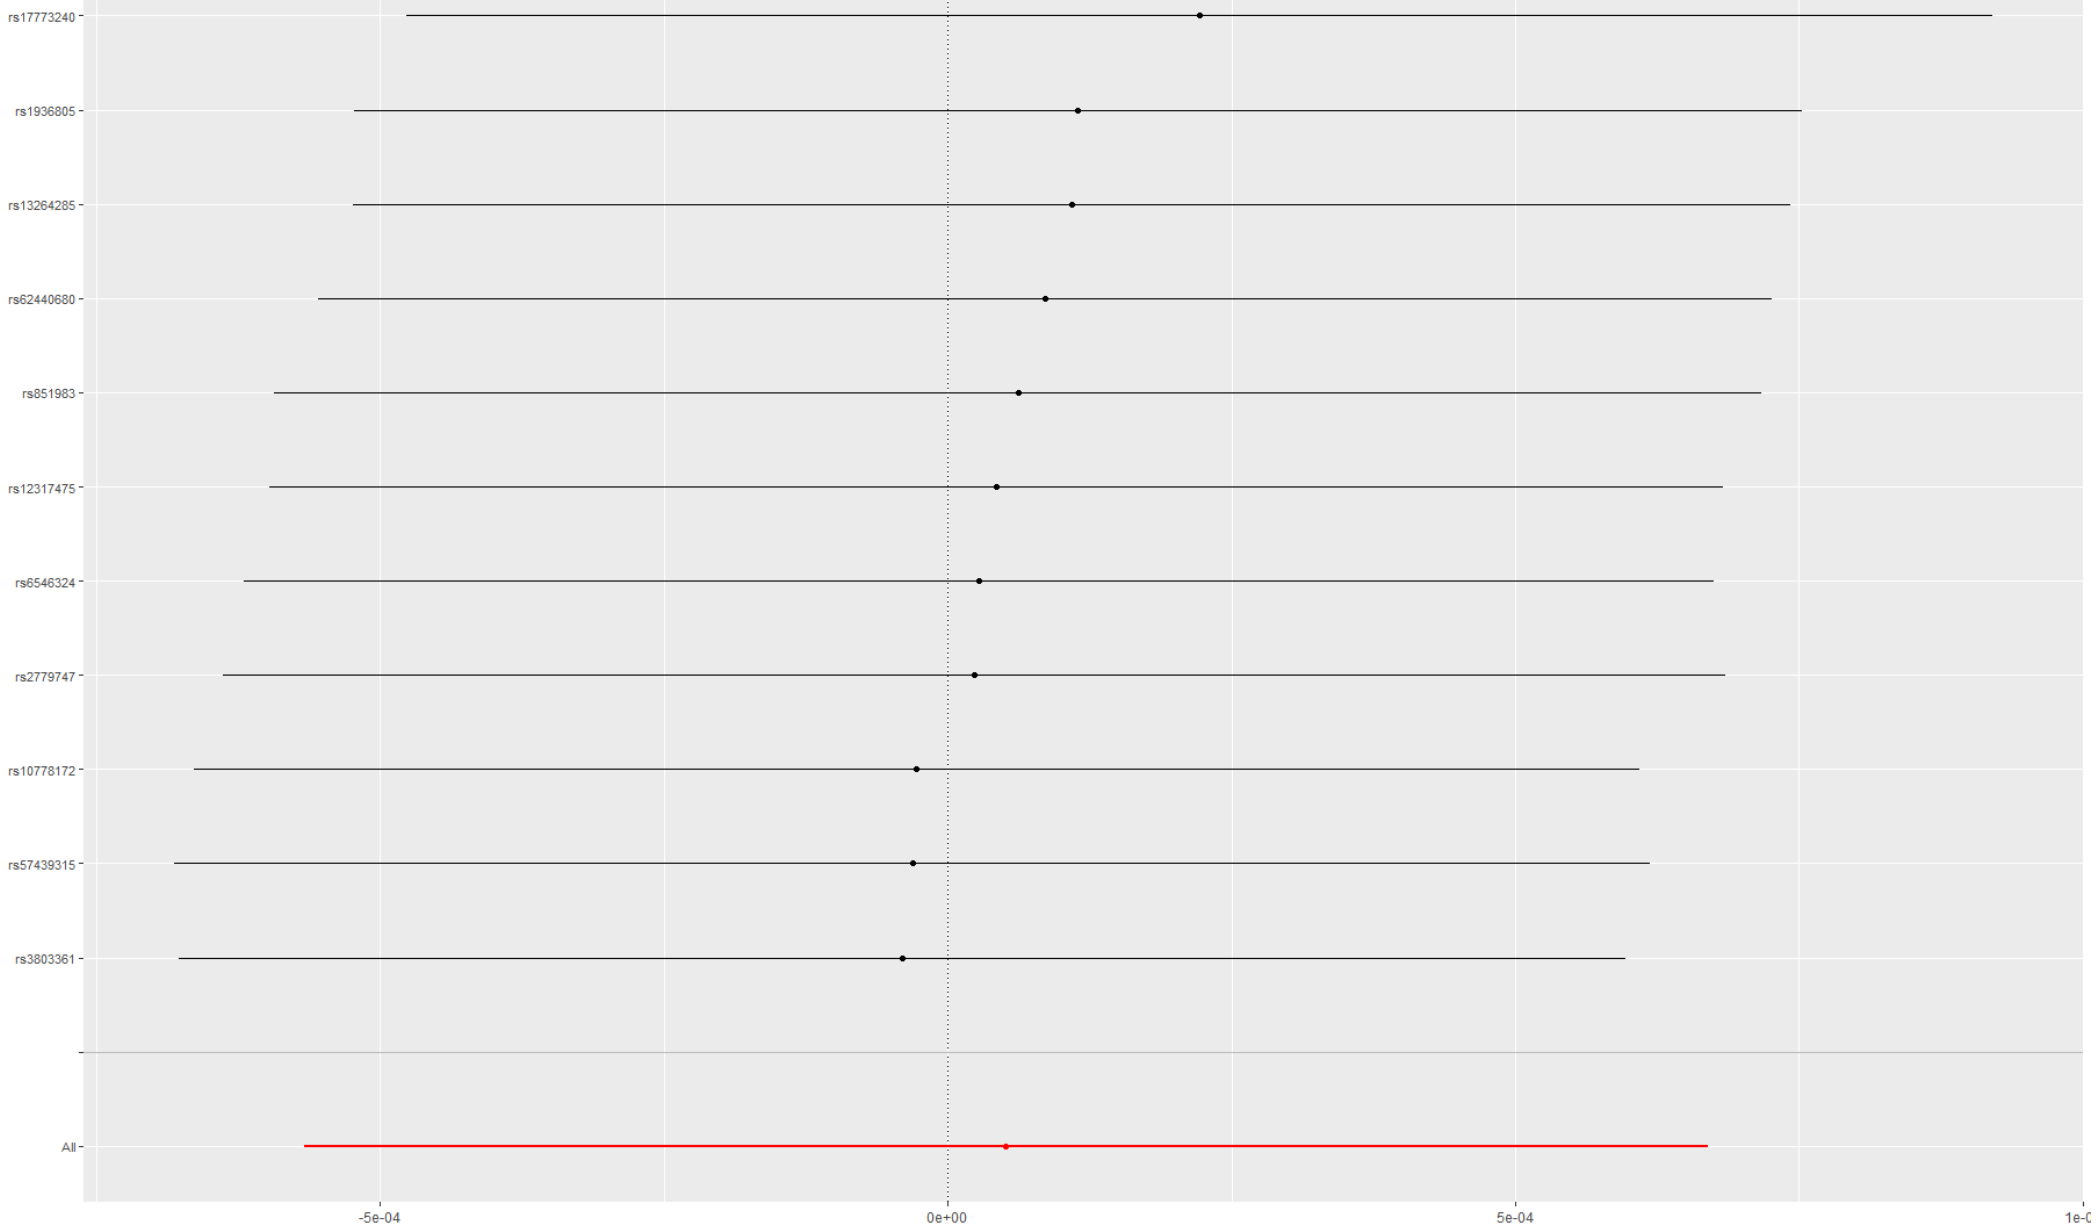

Supplementary Figure 36. Leave-one-out inverse-variance weighted mendelian randomization analyses of endometriosis on kidney cancer

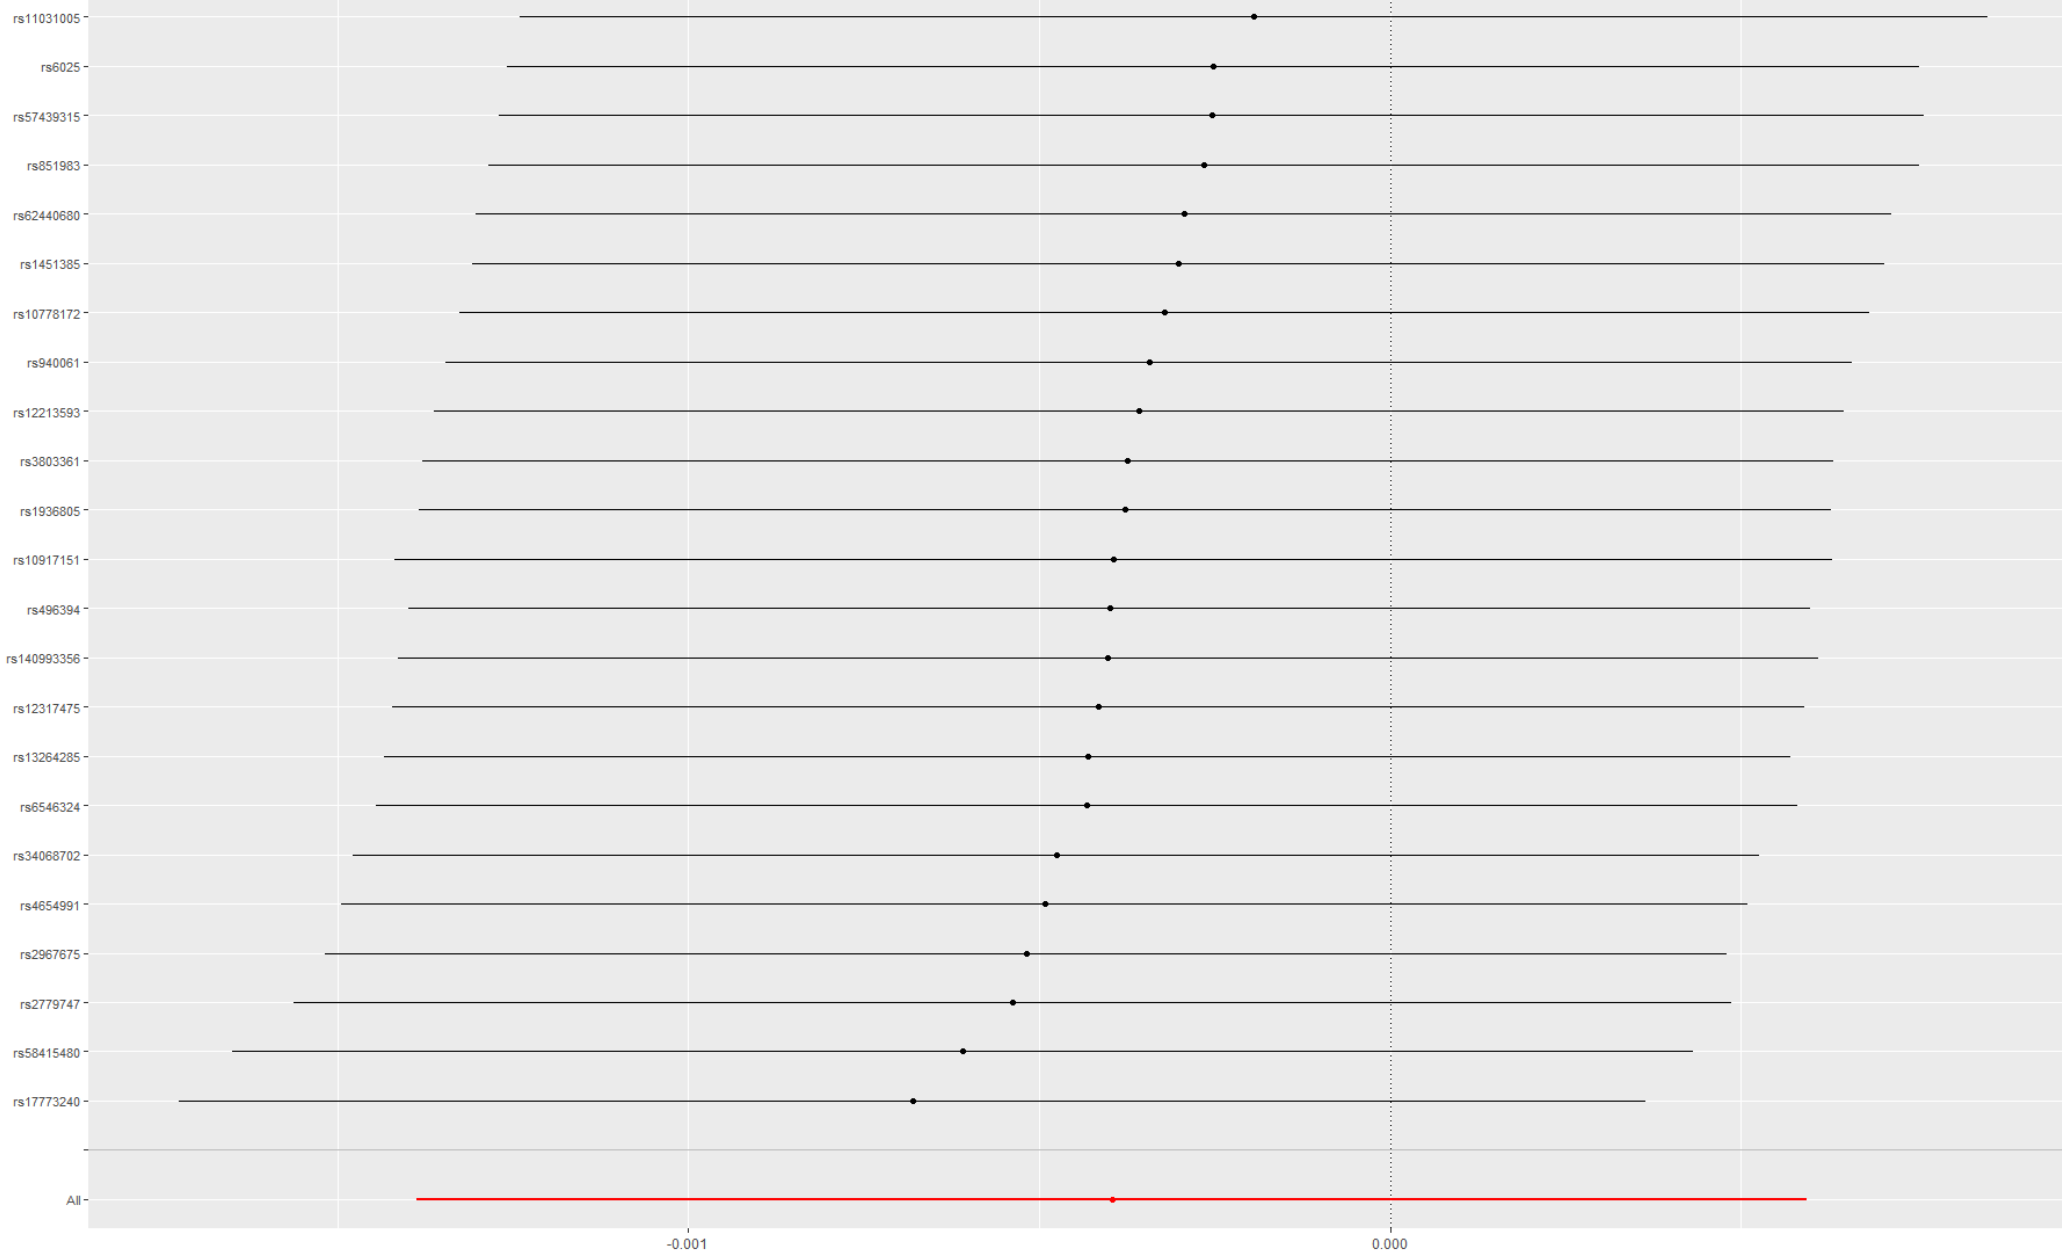

Supplementary Figure 37. Leave-one-out inverse-variance weighted mendelian randomization analyses of endometriosis on melanoma



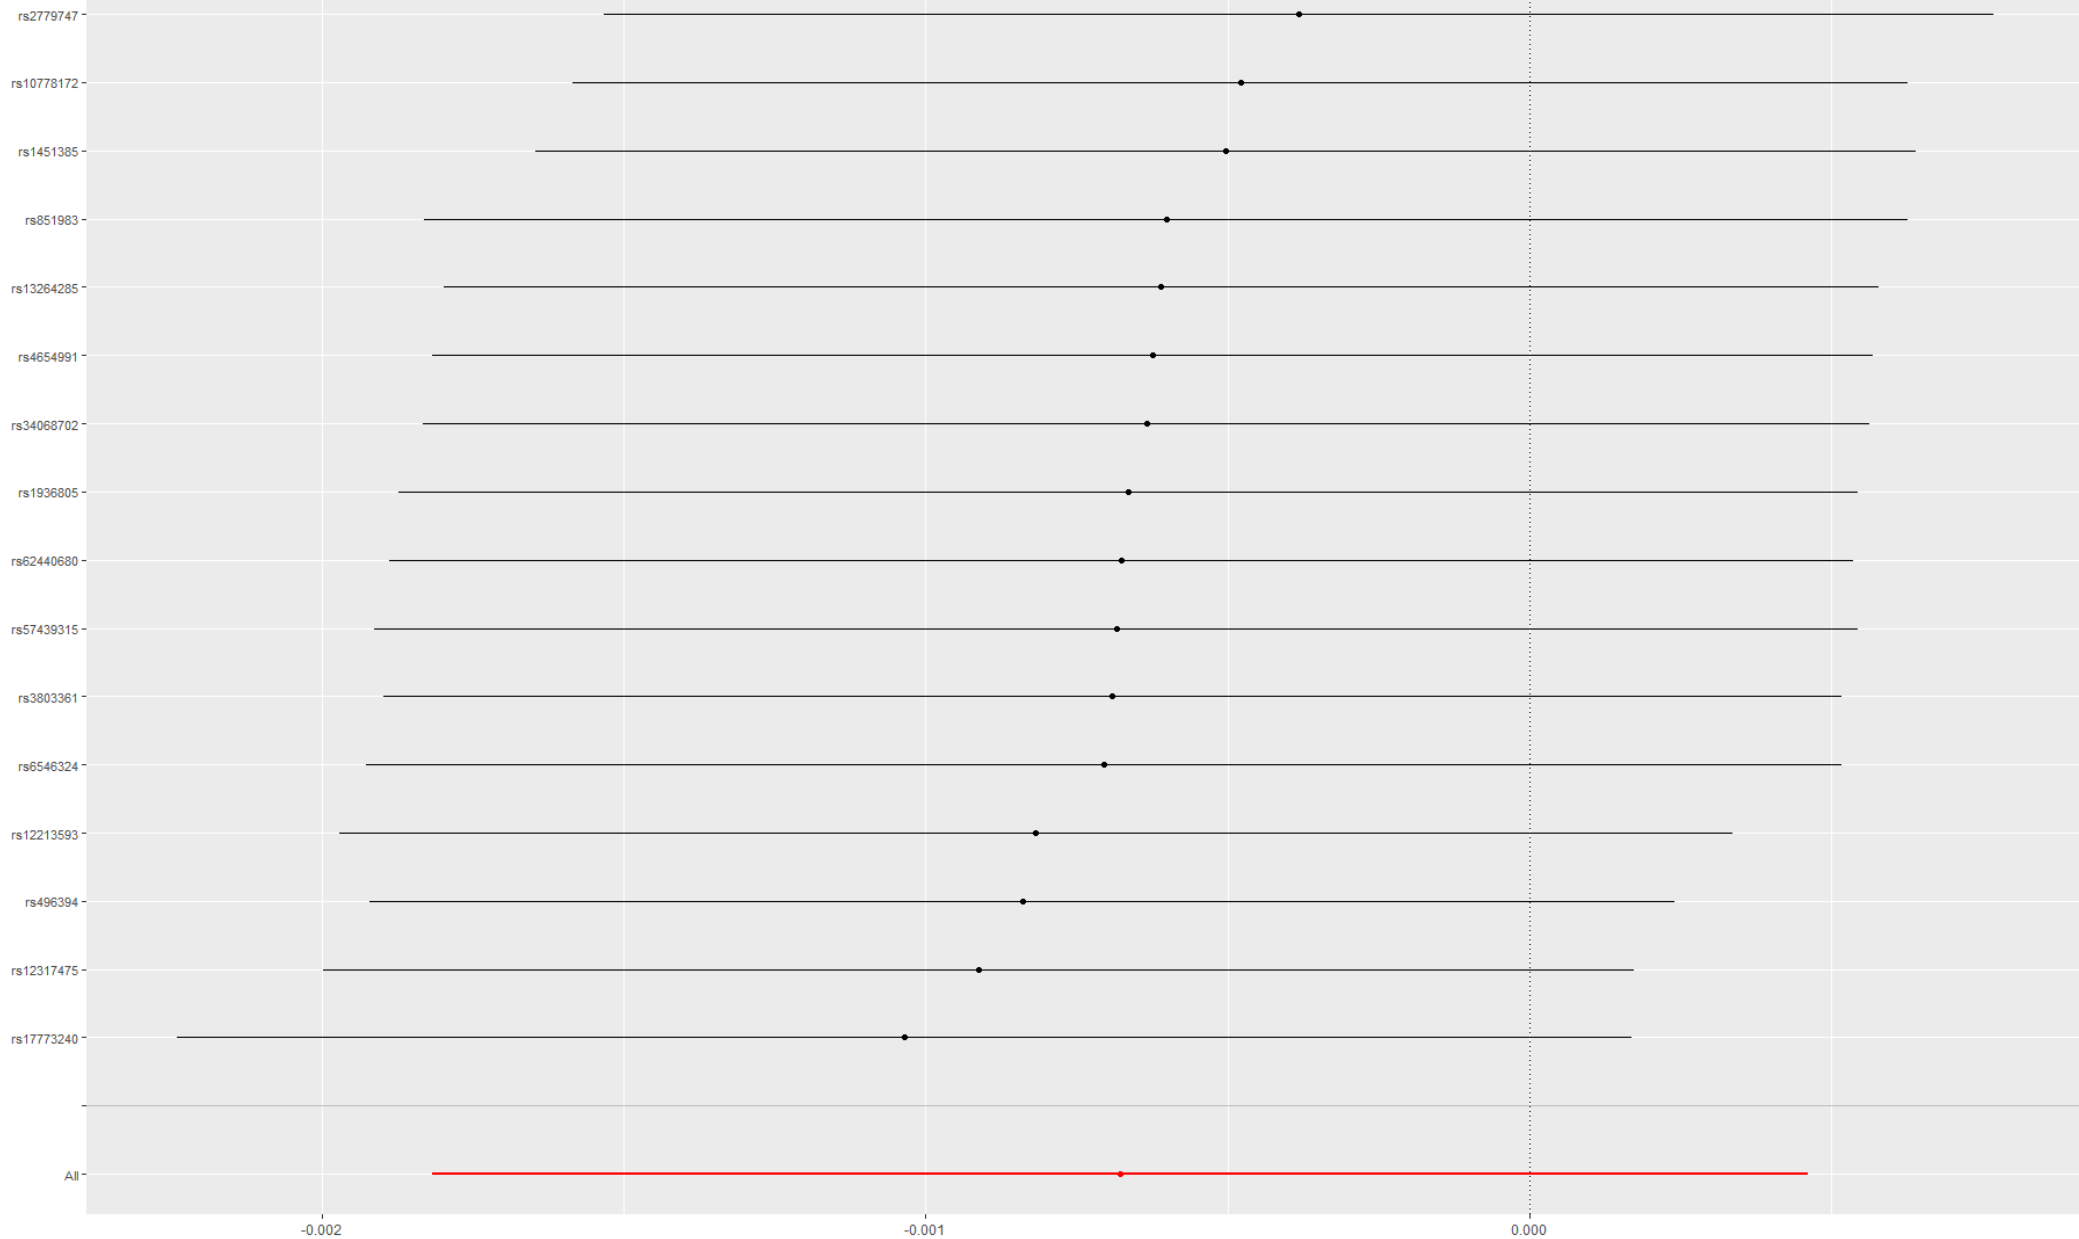

Supplementary Figure 38. Leave-one-out inverse-variance weighted mendelian randomization analyses of endometriosis on cervical cancer
